# Supplementary material for: Recognition Pattern of the Fasciola hepatica Excretome/Secretome during the Course of an Experimental Infection in Sheep by 2D Immunoproteomics
Source: MDPI journal article supplement (doi:10.3390/pathogens10060725), 2021-06-09
Supplement: s1 [file s1]

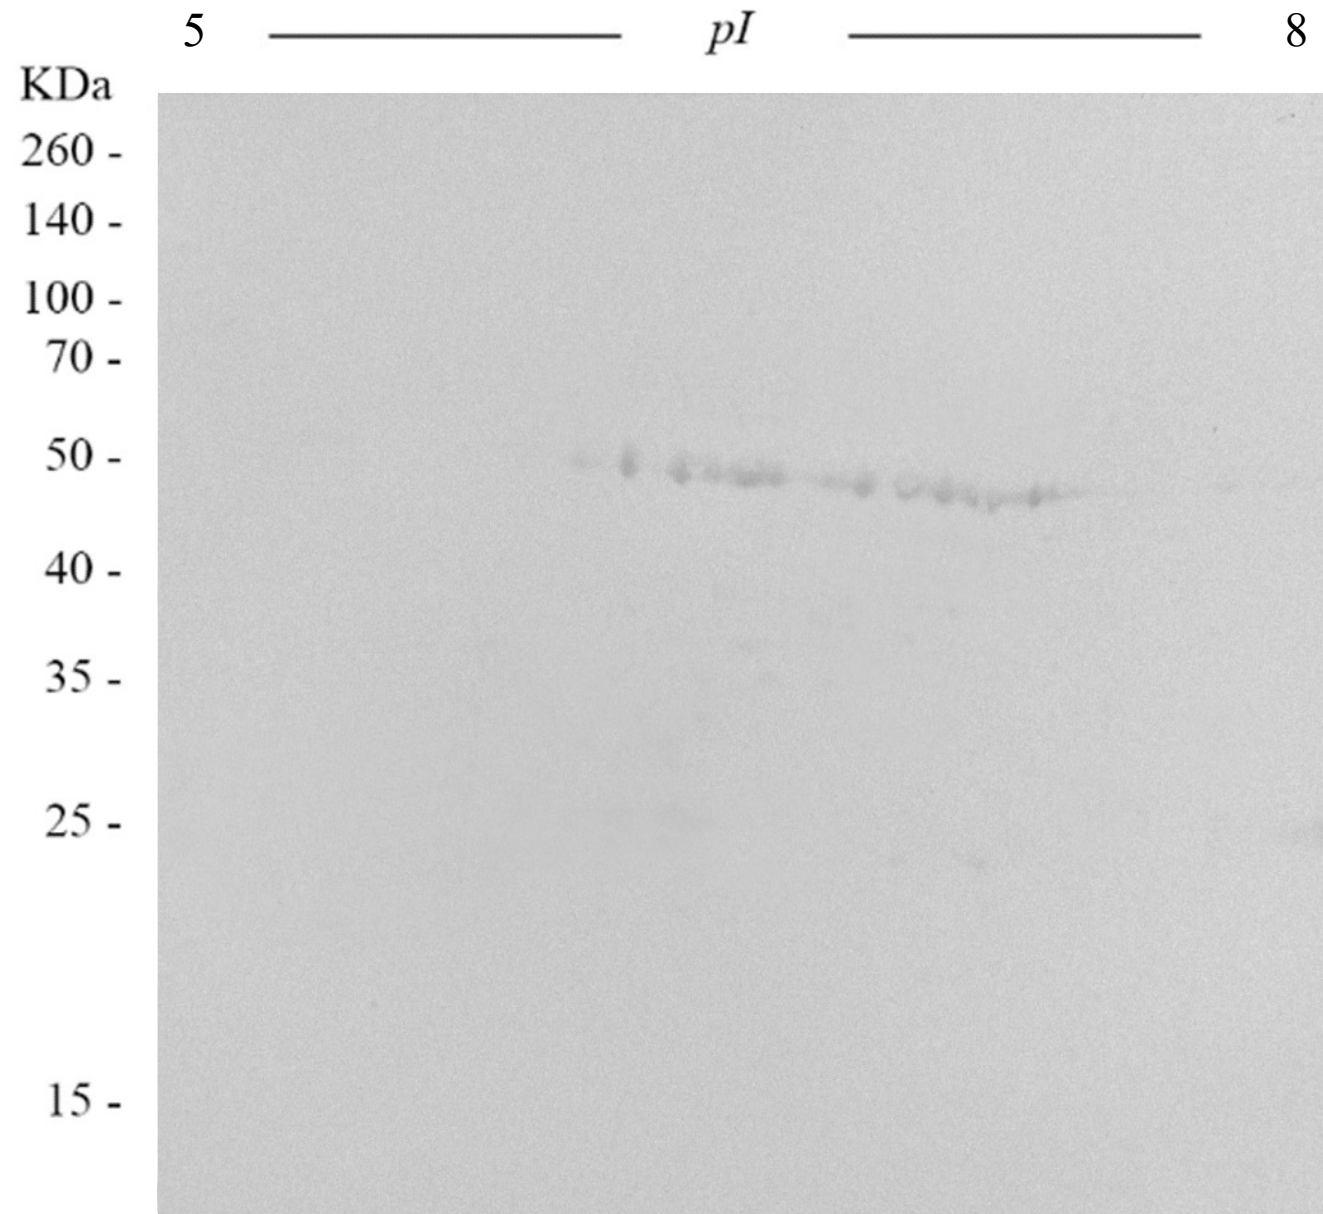

**Figure S2.** Representative western blot of the excretory/secretory products from adult worms of *F. hepatica* (FhES) revealed by a pool of serum samples from experimentally infected sheep before infection (control). The blot was in the 5–8 isoelectrical point range. Reference molecular weight masses are indicated on the left.
