# Supplementary material for: Recognition Pattern of the Fasciola hepatica Excretome/Secretome during the Course of an Experimental Infection in Sheep by 2D Immunoproteomics
Source: MDPI journal article supplement (doi:10.3390/pathogens10060725), 2021-06-09
Supplement: s1 [file s1]

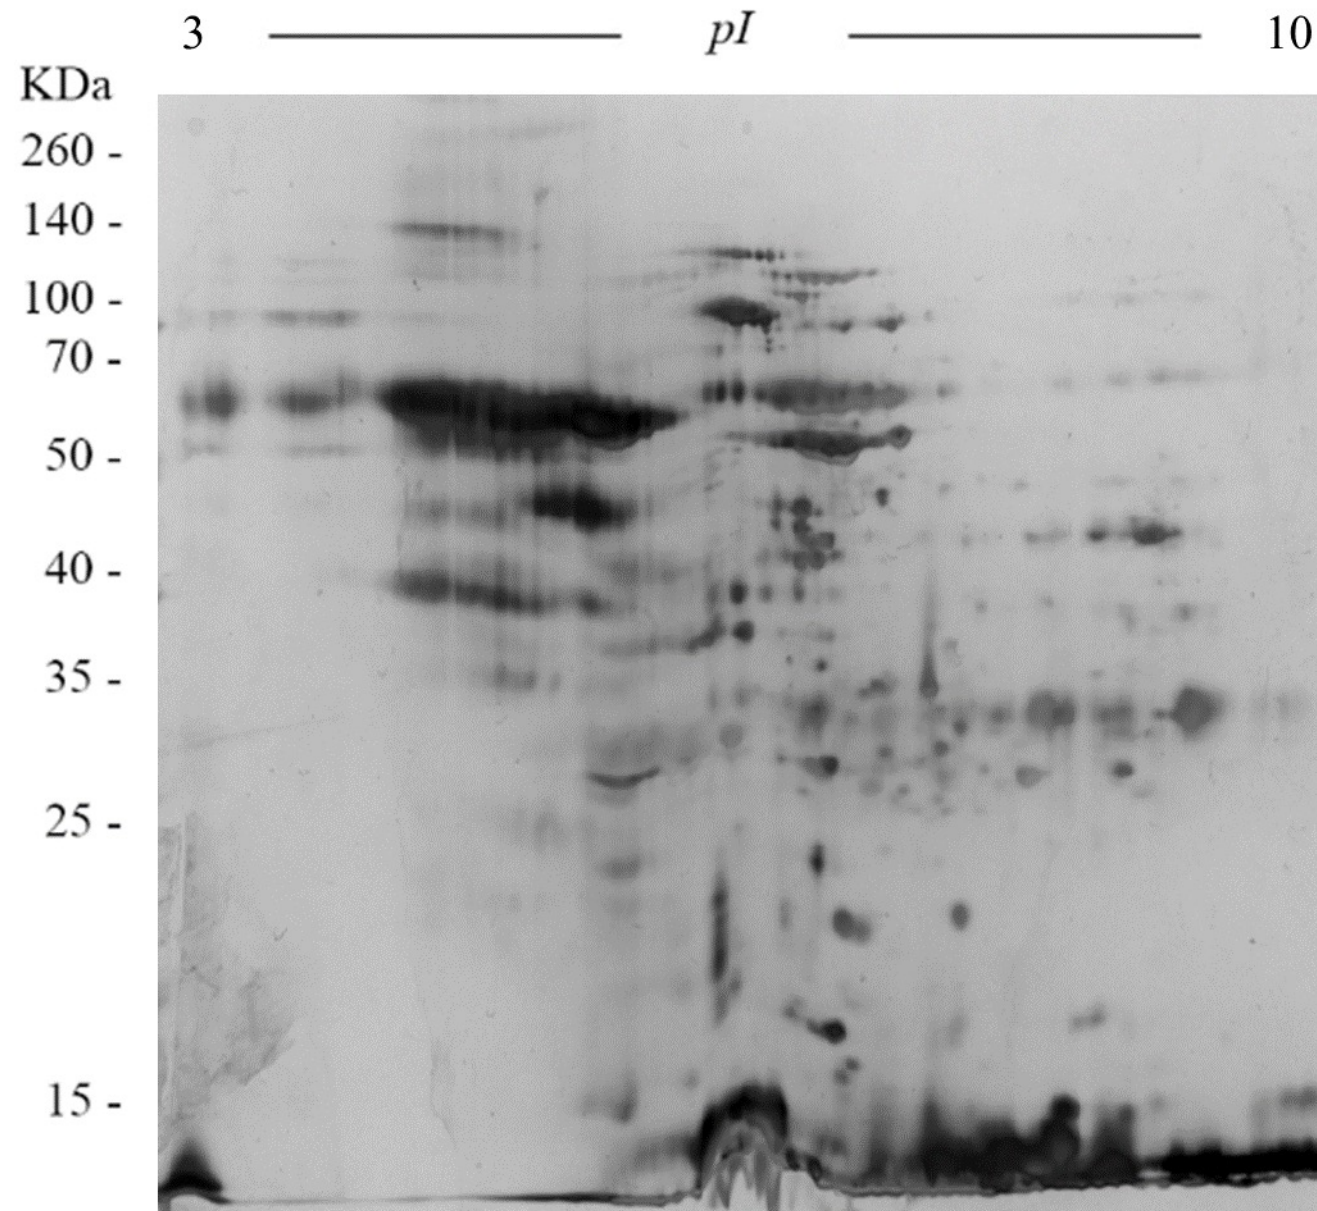

**Figure S1.** Representative two-dimensional electrophoresis of 40  $\mu$ g of the excretory/secretory products from adult worms of *F. hepatica* (FhES). The gels were in the 3–10 isoelectrical point range, 12% poly-acrylamide and silver-stained. Reference molecular weight masses are indicated on the left.
