# Supplementary material for: Recognition Pattern of the Fasciola hepatica Excretome/Secretome during the Course of an Experimental Infection in Sheep by 2D Immunoproteomics
Source: Pathogens. 2021 Jun 9;10(6):725. doi: 10.3390/pathogens10060725 (PMC8228785; doi:10.3390/pathogens10060725)
Supplement: Supplementary file 1 [file pathogens-10-00725-s001.zip › Table S1_R1.xls]

## Sheet: Unique_Fh_Proteins
Spot	Protein	Main Accession	Description	Gene Name	Chromosome	MW [kDa]	Possible Coverage [%]	Coverage [%]	Spectrum Counting	Confidently Localized Modification Sites	# Confidently Localized Modification Sites	Ambiguously Localized Modification Sites	#Ambiguously Localized Modification Sites	Protein Inference	Secondary Accessions	Protein Group	#Validated Peptides	#Peptides	#Unique	#Validated Unique	#Unique to Group	#Validated Unique to Group	#Validated PSMs	#PSMs	Confidence [%]	Validation
1	2	maker-scaffold10x_324_pilon-snap-gene-0.68-mRNA-1 transcript=maker-scaffold10x_324_pilon-snap-gene-0.68-mRNA-1 gene=maker-scaffold10x_324_pilon-snap-gene-0.68				123.061	69.55	0.78	7952.68					Single Protein		maker-scaffold10x_324_pilon-snap-gene-0.68-mRNA-1 transcript=maker-scaffold10x_324_pilon-snap-gene-0.68-mRNA-1 gene=maker-scaffold10x_324_pilon-snap-gene-0.68	1	1	1	1	1	1	2	2	100	Doubtful
1	3	maker-scaffold10x_598_pilon-snap-gene-1.86-mRNA-1 transcript=maker-scaffold10x_598_pilon-snap-gene-1.86-mRNA-1 gene=maker-scaffold10x_598_pilon-snap-gene-1.86				54.3544	90.98	0	0					Single Protein		maker-scaffold10x_598_pilon-snap-gene-1.86-mRNA-1 transcript=maker-scaffold10x_598_pilon-snap-gene-1.86-mRNA-1 gene=maker-scaffold10x_598_pilon-snap-gene-1.86	0	1	1	0	1	0	0	1	100	Doubtful
2	1	maker-scaffold10x_370_pilon-augustus-gene-0.31-mRNA-1 transcript=maker-scaffold10x_370_pilon-augustus-gene-0.31-mRNA-1 gene=maker-scaffold10x_370_pilon-augustus-gene-0.31				223.349	73.06	0.39	NaN					Single Protein		maker-scaffold10x_370_pilon-augustus-gene-0.31-mRNA-1 transcript=maker-scaffold10x_370_pilon-augustus-gene-0.31-mRNA-1 gene=maker-scaffold10x_370_pilon-augustus-gene-0.31	1	2	2	1	2	1	0	2	100	Doubtful
2	2	maker-scaffold10x_1706_pilon-snap-gene-0.6-mRNA-1 transcript=maker-scaffold10x_1706_pilon-snap-gene-0.6-mRNA-1 gene=maker-scaffold10x_1706_pilon-snap-gene-0.6				56.2049	75.44	2.16	NaN	Oxidation of M(M46)	Oxidation of M(1)			Single Protein		maker-scaffold10x_1706_pilon-snap-gene-0.6-mRNA-1 transcript=maker-scaffold10x_1706_pilon-snap-gene-0.6-mRNA-1 gene=maker-scaffold10x_1706_pilon-snap-gene-0.6	1	2	2	1	2	1	0	2	100	Doubtful
3	1	maker-scaffold10x_262_pilon-snap-gene-0.0-mRNA-1 transcript=maker-scaffold10x_262_pilon-snap-gene-0.0-mRNA-1 gene=maker-scaffold10x_262_pilon-snap-gene-0.0				95.0005	78.74	1.17	2783.9					Single Protein		maker-scaffold10x_262_pilon-snap-gene-0.0-mRNA-1 transcript=maker-scaffold10x_262_pilon-snap-gene-0.0-mRNA-1 gene=maker-scaffold10x_262_pilon-snap-gene-0.0	1	1	1	1	1	1	1	1	100	Doubtful
3	2	maker-scaffold10x_297_pilon-augustus-gene-0.99-mRNA-1 transcript=maker-scaffold10x_297_pilon-augustus-gene-0.99-mRNA-1 gene=maker-scaffold10x_297_pilon-augustus-gene-0.99				272.865	81.51	0.55	1803.31					Single Protein		maker-scaffold10x_297_pilon-augustus-gene-0.99-mRNA-1 transcript=maker-scaffold10x_297_pilon-augustus-gene-0.99-mRNA-1 gene=maker-scaffold10x_297_pilon-augustus-gene-0.99	1	2	2	1	2	1	2	4	100	Doubtful
3	3	maker-scaffold10x_598_pilon-snap-gene-1.86-mRNA-1 transcript=maker-scaffold10x_598_pilon-snap-gene-1.86-mRNA-1 gene=maker-scaffold10x_598_pilon-snap-gene-1.86				54.3544	90.98	2.05	4226.01	Deamidation of Q(Q36)	Deamidation of Q(1)			Single Protein		maker-scaffold10x_598_pilon-snap-gene-1.86-mRNA-1 transcript=maker-scaffold10x_598_pilon-snap-gene-1.86-mRNA-1 gene=maker-scaffold10x_598_pilon-snap-gene-1.86	1	1	1	1	1	1	1	1	100	Doubtful
3	5	maker-scaffold10x_309_pilon-snap-gene-0.1-mRNA-1 transcript=maker-scaffold10x_309_pilon-snap-gene-0.1-mRNA-1 gene=maker-scaffold10x_309_pilon-snap-gene-0.1				111.328	75.71	1.18	2427.36					Single Protein		maker-scaffold10x_309_pilon-snap-gene-0.1-mRNA-1 transcript=maker-scaffold10x_309_pilon-snap-gene-0.1-mRNA-1 gene=maker-scaffold10x_309_pilon-snap-gene-0.1	1	1	1	1	1	1	1	1	100	Doubtful
3	6	maker-scaffold10x_205_pilon-snap-gene-0.60-mRNA-1 transcript=maker-scaffold10x_205_pilon-snap-gene-0.60-mRNA-1 gene=maker-scaffold10x_205_pilon-snap-gene-0.60				44.7333	72.43	2.26	6492.55					Single Protein		maker-scaffold10x_205_pilon-snap-gene-0.60-mRNA-1 transcript=maker-scaffold10x_205_pilon-snap-gene-0.60-mRNA-1 gene=maker-scaffold10x_205_pilon-snap-gene-0.60	1	1	1	1	1	1	1	1	100	Doubtful
3	7	maker-scaffold10x_1600_pilon-snap-gene-0.3-mRNA-1 transcript=maker-scaffold10x_1600_pilon-snap-gene-0.3-mRNA-1 gene=maker-scaffold10x_1600_pilon-snap-gene-0.3				28.9939	87.22	4.51	8087.71					Single Protein		maker-scaffold10x_1600_pilon-snap-gene-0.3-mRNA-1 transcript=maker-scaffold10x_1600_pilon-snap-gene-0.3-mRNA-1 gene=maker-scaffold10x_1600_pilon-snap-gene-0.3	1	1	1	1	1	1	1	1	100	Doubtful
4	1	maker-scaffold10x_345_pilon-snap-gene-1.111-mRNA-1 transcript=maker-scaffold10x_345_pilon-snap-gene-1.111-mRNA-1 gene=maker-scaffold10x_345_pilon-snap-gene-1.111				148.06	64.61	1.63	NaN	Deamidation of N(N861)	Deamidation of N(1)			Single Protein		maker-scaffold10x_345_pilon-snap-gene-1.111-mRNA-1 transcript=maker-scaffold10x_345_pilon-snap-gene-1.111-mRNA-1 gene=maker-scaffold10x_345_pilon-snap-gene-1.111	1	2	2	1	2	1	0	2	100	Doubtful
4	2	maker-scaffold10x_1115_pilon-snap-gene-0.5-mRNA-1 transcript=maker-scaffold10x_1115_pilon-snap-gene-0.5-mRNA-1 gene=maker-scaffold10x_1115_pilon-snap-gene-0.5				40.2964	74.18	3.02	NaN					Single Protein		maker-scaffold10x_1115_pilon-snap-gene-0.5-mRNA-1 transcript=maker-scaffold10x_1115_pilon-snap-gene-0.5-mRNA-1 gene=maker-scaffold10x_1115_pilon-snap-gene-0.5	1	1	1	1	1	1	0	1	100	Doubtful
4	3	maker-scaffold10x_598_pilon-snap-gene-1.86-mRNA-1 transcript=maker-scaffold10x_598_pilon-snap-gene-1.86-mRNA-1 gene=maker-scaffold10x_598_pilon-snap-gene-1.86				54.3544	90.98	2.05	NaN	Deamidation of Q(Q36)	Deamidation of Q(1)			Single Protein		maker-scaffold10x_598_pilon-snap-gene-1.86-mRNA-1 transcript=maker-scaffold10x_598_pilon-snap-gene-1.86-mRNA-1 gene=maker-scaffold10x_598_pilon-snap-gene-1.86	1	1	1	1	1	1	0	1	100	Doubtful
4	5	maker-scaffold10x_1272_pilon-snap-gene-0.11-mRNA-1 transcript=maker-scaffold10x_1272_pilon-snap-gene-0.11-mRNA-1 gene=maker-scaffold10x_1272_pilon-snap-gene-0.11				183.626	83.89	0.71	NaN					Single Protein		maker-scaffold10x_1272_pilon-snap-gene-0.11-mRNA-1 transcript=maker-scaffold10x_1272_pilon-snap-gene-0.11-mRNA-1 gene=maker-scaffold10x_1272_pilon-snap-gene-0.11	1	1	1	1	1	1	0	1	100	Doubtful
5	1	maker-scaffold10x_1445_pilon-snap-gene-0.72-mRNA-1 transcript=maker-scaffold10x_1445_pilon-snap-gene-0.72-mRNA-1 gene=maker-scaffold10x_1445_pilon-snap-gene-0.72				117.77	91.08	1.22	2636.89			Deamidation of N (N247-{N247 Q255})	Deamidation of N (1)	Single Protein		maker-scaffold10x_1445_pilon-snap-gene-0.72-mRNA-1 transcript=maker-scaffold10x_1445_pilon-snap-gene-0.72-mRNA-1 gene=maker-scaffold10x_1445_pilon-snap-gene-0.72	1	2	2	1	2	1	1	4	11.3953	Doubtful
5	2	maker-scaffold10x_749_pilon-snap-gene-0.139-mRNA-1 transcript=maker-scaffold10x_749_pilon-snap-gene-0.139-mRNA-1 gene=maker-scaffold10x_749_pilon-snap-gene-0.139				23.9044	80.57	6.16	15045.8					Single Protein		maker-scaffold10x_749_pilon-snap-gene-0.139-mRNA-1 transcript=maker-scaffold10x_749_pilon-snap-gene-0.139-mRNA-1 gene=maker-scaffold10x_749_pilon-snap-gene-0.139	1	1	1	1	1	1	1	1	11.3953	Doubtful
5	3	maker-scaffold10x_297_pilon-augustus-gene-0.99-mRNA-1 transcript=maker-scaffold10x_297_pilon-augustus-gene-0.99-mRNA-1 gene=maker-scaffold10x_297_pilon-augustus-gene-0.99				272.865	81.51	0.55	1229.11					Single Protein		maker-scaffold10x_297_pilon-augustus-gene-0.99-mRNA-1 transcript=maker-scaffold10x_297_pilon-augustus-gene-0.99-mRNA-1 gene=maker-scaffold10x_297_pilon-augustus-gene-0.99	1	2	2	1	2	1	1	3	11.3953	Doubtful
5	4	maker-scaffold10x_598_pilon-snap-gene-1.86-mRNA-1 transcript=maker-scaffold10x_598_pilon-snap-gene-1.86-mRNA-1 gene=maker-scaffold10x_598_pilon-snap-gene-1.86				54.3544	90.98	2.05	5760.78	Deamidation of Q(Q36)	Deamidation of Q(1)			Single Protein		maker-scaffold10x_598_pilon-snap-gene-1.86-mRNA-1 transcript=maker-scaffold10x_598_pilon-snap-gene-1.86-mRNA-1 gene=maker-scaffold10x_598_pilon-snap-gene-1.86	1	1	1	1	1	1	1	1	11.3953	Doubtful
5	5	maker-scaffold10x_113_pilon-snap-gene-0.192-mRNA-1 transcript=maker-scaffold10x_113_pilon-snap-gene-0.192-mRNA-1 gene=maker-scaffold10x_113_pilon-snap-gene-0.192				156.924	81.64	0.85	2220.3					Single Protein		maker-scaffold10x_113_pilon-snap-gene-0.192-mRNA-1 transcript=maker-scaffold10x_113_pilon-snap-gene-0.192-mRNA-1 gene=maker-scaffold10x_113_pilon-snap-gene-0.192	1	1	1	1	1	1	1	1	11.3953	Doubtful
5	6	maker-scaffold10x_1272_pilon-snap-gene-0.11-mRNA-1 transcript=maker-scaffold10x_1272_pilon-snap-gene-0.11-mRNA-1 gene=maker-scaffold10x_1272_pilon-snap-gene-0.11				183.626	83.89	0.71	1812.75					Single Protein		maker-scaffold10x_1272_pilon-snap-gene-0.11-mRNA-1 transcript=maker-scaffold10x_1272_pilon-snap-gene-0.11-mRNA-1 gene=maker-scaffold10x_1272_pilon-snap-gene-0.11	1	1	1	1	1	1	1	1	11.3953	Doubtful
5	7	maker-scaffold10x_815_pilon-snap-gene-1.82-mRNA-1 transcript=maker-scaffold10x_815_pilon-snap-gene-1.82-mRNA-1 gene=maker-scaffold10x_815_pilon-snap-gene-1.82				1151.7	80.4	0	0					Single Protein		maker-scaffold10x_815_pilon-snap-gene-1.82-mRNA-1 transcript=maker-scaffold10x_815_pilon-snap-gene-1.82-mRNA-1 gene=maker-scaffold10x_815_pilon-snap-gene-1.82	0	4	4	0	4	0	0	4	11.3953	Doubtful
5	8	maker-scaffold10x_591_pilon-snap-gene-0.8-mRNA-1 transcript=maker-scaffold10x_591_pilon-snap-gene-0.8-mRNA-1 gene=maker-scaffold10x_591_pilon-snap-gene-0.8				46.5505	64.85	2.38	0					Single Protein		maker-scaffold10x_591_pilon-snap-gene-0.8-mRNA-1 transcript=maker-scaffold10x_591_pilon-snap-gene-0.8-mRNA-1 gene=maker-scaffold10x_591_pilon-snap-gene-0.8	1	1	1	1	1	1	0	1	11.3953	Doubtful
6	1	maker-scaffold10x_1272_pilon-snap-gene-0.11-mRNA-1 transcript=maker-scaffold10x_1272_pilon-snap-gene-0.11-mRNA-1 gene=maker-scaffold10x_1272_pilon-snap-gene-0.11				183.626	83.89	0	NaN					Single Protein		maker-scaffold10x_1272_pilon-snap-gene-0.11-mRNA-1 transcript=maker-scaffold10x_1272_pilon-snap-gene-0.11-mRNA-1 gene=maker-scaffold10x_1272_pilon-snap-gene-0.11	0	2	2	0	2	0	0	2	4.61957	Doubtful
6	2	maker-scaffold10x_19_pilon-augustus-gene-0.63-mRNA-1 transcript=maker-scaffold10x_19_pilon-augustus-gene-0.63-mRNA-1 gene=maker-scaffold10x_19_pilon-augustus-gene-0.63				190.64	62.51	0	NaN					Single Protein		maker-scaffold10x_19_pilon-augustus-gene-0.63-mRNA-1 transcript=maker-scaffold10x_19_pilon-augustus-gene-0.63-mRNA-1 gene=maker-scaffold10x_19_pilon-augustus-gene-0.63	0	1	1	0	1	0	0	1	4.61957	Doubtful
8	1	maker-scaffold10x_1272_pilon-snap-gene-0.11-mRNA-1 transcript=maker-scaffold10x_1272_pilon-snap-gene-0.11-mRNA-1 gene=maker-scaffold10x_1272_pilon-snap-gene-0.11				183.626	83.89	0	0					Single Protein		maker-scaffold10x_1272_pilon-snap-gene-0.11-mRNA-1 transcript=maker-scaffold10x_1272_pilon-snap-gene-0.11-mRNA-1 gene=maker-scaffold10x_1272_pilon-snap-gene-0.11	0	1	1	0	1	0	1	1	10.8401	Doubtful
11	2	maker-scaffold10x_387_pilon-snap-gene-0.68-mRNA-1 transcript=maker-scaffold10x_387_pilon-snap-gene-0.68-mRNA-1 gene=maker-scaffold10x_387_pilon-snap-gene-0.68				56.9172	83.59	1.54	807.942					Single Protein		maker-scaffold10x_387_pilon-snap-gene-0.68-mRNA-1 transcript=maker-scaffold10x_387_pilon-snap-gene-0.68-mRNA-1 gene=maker-scaffold10x_387_pilon-snap-gene-0.68	1	1	1	1	1	1	1	2	100	Doubtful
11	4	augustus_masked-scaffold10x_269_pilon-processed-gene-0.18-mRNA-1 transcript=augustus_masked-scaffold10x_269_pilon-processed-gene-0.18-mRNA-1 gene=augustus_masked-scaffold10x_269_pilon-processed-gene-0.18				41.6188	76.86	2.66	1046.46					Related Proteins	augustus_masked-scaffold10x_269_pilon-processed-gene-0.22-mRNA-1 transcript=augustus_masked-scaffold10x_269_pilon-processed-gene-0.22-mRNA-1 gene=augustus_masked-scaffold10x_269_pilon-processed-gene-0.22, augustus_masked-scaffold10x_502_pilon-processed-gene-0.29-mRNA-1 transcript=augustus_masked-scaffold10x_502_pilon-processed-gene-0.29-mRNA-1 gene=augustus_masked-scaffold10x_502_pilon-processed-…	augustus_masked-scaffold10x_269_pilon-processed-gene-0.18-mRNA-1 transcript=augustus_masked-scaffold10x_269_pilon-processed-gene-0.18-mRNA-1 gene=augustus_masked-scaffold10x_269_pilon-processed-gene-0.18, augustus_masked-scaffold10x_269_pilon-processed-gene-0.22-mRNA-1 transcript=augustus_masked-scaffold10x_269_pilon-processed-gene-0.22-mRNA-1 gene=augustus_masked-scaffold10x_269_pilon-processed-…	1	1	0	0	0	0	1	1	100	Doubtful
11	6	maker-scaffold10x_1061_pilon-snap-gene-0.101-mRNA-1 transcript=maker-scaffold10x_1061_pilon-snap-gene-0.101-mRNA-1 gene=maker-scaffold10x_1061_pilon-snap-gene-0.101				68.7774	87.71	2.99	653.601			Deamidation of N (N127-{N118 Q120 N127 N130})	Deamidation of N (1)	Single Protein		maker-scaffold10x_1061_pilon-snap-gene-0.101-mRNA-1 transcript=maker-scaffold10x_1061_pilon-snap-gene-0.101-mRNA-1 gene=maker-scaffold10x_1061_pilon-snap-gene-0.101	1	1	1	1	1	1	1	1	100	Doubtful
11	8	maker-scaffold10x_466_pilon-snap-gene-0.92-mRNA-1 transcript=maker-scaffold10x_466_pilon-snap-gene-0.92-mRNA-1 gene=maker-scaffold10x_466_pilon-snap-gene-0.92				48.1419	63.02	2.09	1099.07	Oxidation of M(M261)	Oxidation of M(1)			Single Protein		maker-scaffold10x_466_pilon-snap-gene-0.92-mRNA-1 transcript=maker-scaffold10x_466_pilon-snap-gene-0.92-mRNA-1 gene=maker-scaffold10x_466_pilon-snap-gene-0.92	1	1	1	1	1	1	1	2	100	Doubtful
11	9	augustus_masked-scaffold10x_269_pilon-processed-gene-0.18-mRNA-1 transcript=augustus_masked-scaffold10x_269_pilon-processed-gene-0.18-mRNA-1 gene=augustus_masked-scaffold10x_269_pilon-processed-gene-0.18				41.6188	76.86	4.26	0					Related Proteins	augustus_masked-scaffold10x_269_pilon-processed-gene-0.22-mRNA-1 transcript=augustus_masked-scaffold10x_269_pilon-processed-gene-0.22-mRNA-1 gene=augustus_masked-scaffold10x_269_pilon-processed-gene-0.22, augustus_masked-scaffold10x_502_pilon-processed-gene-0.29-mRNA-1 transcript=augustus_masked-scaffold10x_502_pilon-processed-gene-0.29-mRNA-1 gene=augustus_masked-scaffold10x_502_pilon-processed-…	augustus_masked-scaffold10x_269_pilon-processed-gene-0.18-mRNA-1 transcript=augustus_masked-scaffold10x_269_pilon-processed-gene-0.18-mRNA-1 gene=augustus_masked-scaffold10x_269_pilon-processed-gene-0.18, augustus_masked-scaffold10x_269_pilon-processed-gene-0.22-mRNA-1 transcript=augustus_masked-scaffold10x_269_pilon-processed-gene-0.22-mRNA-1 gene=augustus_masked-scaffold10x_269_pilon-processed-…	1	1	0	0	0	0	0	1	95	Doubtful
11	10	maker-scaffold10x_245_pilon-snap-gene-0.128-mRNA-1 transcript=maker-scaffold10x_245_pilon-snap-gene-0.128-mRNA-1 gene=maker-scaffold10x_245_pilon-snap-gene-0.128				113.972	62.78	1.04	448.652					Single Protein		maker-scaffold10x_245_pilon-snap-gene-0.128-mRNA-1 transcript=maker-scaffold10x_245_pilon-snap-gene-0.128-mRNA-1 gene=maker-scaffold10x_245_pilon-snap-gene-0.128	1	1	1	1	1	1	1	3	100	Doubtful
11	11	maker-scaffold10x_894_pilon-augustus-gene-0.86-mRNA-1 transcript=maker-scaffold10x_894_pilon-augustus-gene-0.86-mRNA-1 gene=maker-scaffold10x_894_pilon-augustus-gene-0.86				78.4245	69.59	1.46	826.613					Single Protein		maker-scaffold10x_894_pilon-augustus-gene-0.86-mRNA-1 transcript=maker-scaffold10x_894_pilon-augustus-gene-0.86-mRNA-1 gene=maker-scaffold10x_894_pilon-augustus-gene-0.86	1	1	1	1	1	1	1	1	100	Doubtful
11	14	maker-scaffold10x_445_pilon-snap-gene-0.20-mRNA-1 transcript=maker-scaffold10x_445_pilon-snap-gene-0.20-mRNA-1 gene=maker-scaffold10x_445_pilon-snap-gene-0.20				175.666	86.69	0.62	485.463					Single Protein		maker-scaffold10x_445_pilon-snap-gene-0.20-mRNA-1 transcript=maker-scaffold10x_445_pilon-snap-gene-0.20-mRNA-1 gene=maker-scaffold10x_445_pilon-snap-gene-0.20	1	1	1	1	1	1	2	2	100	Doubtful
11	18	maker-scaffold10x_137_pilon-snap-gene-0.19-mRNA-1 transcript=maker-scaffold10x_137_pilon-snap-gene-0.19-mRNA-1 gene=maker-scaffold10x_137_pilon-snap-gene-0.19				204.281	77.19	0.49	235.892					Single Protein		maker-scaffold10x_137_pilon-snap-gene-0.19-mRNA-1 transcript=maker-scaffold10x_137_pilon-snap-gene-0.19-mRNA-1 gene=maker-scaffold10x_137_pilon-snap-gene-0.19	1	2	2	1	2	1	1	2	100	Doubtful
11	19	maker-scaffold10x_330_pilon-snap-gene-0.93-mRNA-1 transcript=maker-scaffold10x_330_pilon-snap-gene-0.93-mRNA-1 gene=maker-scaffold10x_330_pilon-snap-gene-0.93				74.8455	62.62	1.26	746.618					Single Protein		maker-scaffold10x_330_pilon-snap-gene-0.93-mRNA-1 transcript=maker-scaffold10x_330_pilon-snap-gene-0.93-mRNA-1 gene=maker-scaffold10x_330_pilon-snap-gene-0.93	1	1	1	1	1	1	1	1	100	Doubtful
14	2	maker-scaffold10x_45_pilon-snap-gene-0.54-mRNA-1 transcript=maker-scaffold10x_45_pilon-snap-gene-0.54-mRNA-1 gene=maker-scaffold10x_45_pilon-snap-gene-0.54				38.0224	84.84	10.5	3803.57	Deamidation of N(N300)	Deamidation of N(1)			Single Protein		maker-scaffold10x_45_pilon-snap-gene-0.54-mRNA-1 transcript=maker-scaffold10x_45_pilon-snap-gene-0.54-mRNA-1 gene=maker-scaffold10x_45_pilon-snap-gene-0.54	3	7	7	3	7	3	7	8	100	Doubtful
14	5	maker-scaffold10x_114_pilon-snap-gene-0.90-mRNA-1 transcript=maker-scaffold10x_114_pilon-snap-gene-0.90-mRNA-1 gene=maker-scaffold10x_114_pilon-snap-gene-0.90				29.8868	100	4.85	2252.72					Single Protein		maker-scaffold10x_114_pilon-snap-gene-0.90-mRNA-1 transcript=maker-scaffold10x_114_pilon-snap-gene-0.90-mRNA-1 gene=maker-scaffold10x_114_pilon-snap-gene-0.90	1	5	5	1	5	1	1	5	100	Doubtful
14	6	maker-scaffold10x_1382_pilon-snap-gene-0.57-mRNA-1 transcript=maker-scaffold10x_1382_pilon-snap-gene-0.57-mRNA-1 gene=maker-scaffold10x_1382_pilon-snap-gene-0.57				35.725	100	3.48	1910.54					Single Protein		maker-scaffold10x_1382_pilon-snap-gene-0.57-mRNA-1 transcript=maker-scaffold10x_1382_pilon-snap-gene-0.57-mRNA-1 gene=maker-scaffold10x_1382_pilon-snap-gene-0.57	1	2	2	1	2	1	1	2	100	Doubtful
14	10	maker-scaffold10x_80_pilon-augustus-gene-0.131-mRNA-1 transcript=maker-scaffold10x_80_pilon-augustus-gene-0.131-mRNA-1 gene=maker-scaffold10x_80_pilon-augustus-gene-0.131				23.343	84.91	0	0					Single Protein		maker-scaffold10x_80_pilon-augustus-gene-0.131-mRNA-1 transcript=maker-scaffold10x_80_pilon-augustus-gene-0.131-mRNA-1 gene=maker-scaffold10x_80_pilon-augustus-gene-0.131	0	1	1	0	1	0	0	1	82.3529	Doubtful
15	2	maker-scaffold10x_1189_pilon-snap-gene-0.113-mRNA-1 transcript=maker-scaffold10x_1189_pilon-snap-gene-0.113-mRNA-1 gene=maker-scaffold10x_1189_pilon-snap-gene-0.113				67.8437	92.7	1.66	691.622					Single Protein		maker-scaffold10x_1189_pilon-snap-gene-0.113-mRNA-1 transcript=maker-scaffold10x_1189_pilon-snap-gene-0.113-mRNA-1 gene=maker-scaffold10x_1189_pilon-snap-gene-0.113	1	2	2	1	2	1	1	2	9.21502	Doubtful
15	5	maker-scaffold10x_113_pilon-augustus-gene-0.45-mRNA-1 transcript=maker-scaffold10x_113_pilon-augustus-gene-0.45-mRNA-1 gene=maker-scaffold10x_113_pilon-augustus-gene-0.45				27.1849	86.53	7.76	911.832					Single Protein		maker-scaffold10x_113_pilon-augustus-gene-0.45-mRNA-1 transcript=maker-scaffold10x_113_pilon-augustus-gene-0.45-mRNA-1 gene=maker-scaffold10x_113_pilon-augustus-gene-0.45	2	5	5	2	5	2	1	8	9.21502	Doubtful
15	6	maker-scaffold10x_794_pilon-snap-gene-0.129-mRNA-1 transcript=maker-scaffold10x_794_pilon-snap-gene-0.129-mRNA-1 gene=maker-scaffold10x_794_pilon-snap-gene-0.129				31.4931	100	10.49	4055.42					Single Protein		maker-scaffold10x_794_pilon-snap-gene-0.129-mRNA-1 transcript=maker-scaffold10x_794_pilon-snap-gene-0.129-mRNA-1 gene=maker-scaffold10x_794_pilon-snap-gene-0.129	2	2	2	2	2	2	5	5	9.21502	Doubtful
15	7	maker-scaffold10x_65_pilon-snap-gene-0.12-mRNA-1 transcript=maker-scaffold10x_65_pilon-snap-gene-0.12-mRNA-1 gene=maker-scaffold10x_65_pilon-snap-gene-0.12				27.4146	83	6.48	1885.94					Single Protein		maker-scaffold10x_65_pilon-snap-gene-0.12-mRNA-1 transcript=maker-scaffold10x_65_pilon-snap-gene-0.12-mRNA-1 gene=maker-scaffold10x_65_pilon-snap-gene-0.12	1	1	1	1	1	1	1	1	9.21502	Doubtful
15	11	maker-scaffold10x_137_pilon-snap-gene-0.19-mRNA-1 transcript=maker-scaffold10x_137_pilon-snap-gene-0.19-mRNA-1 gene=maker-scaffold10x_137_pilon-snap-gene-0.19				204.281	91.7	0.49	231.785					Single Protein		maker-scaffold10x_137_pilon-snap-gene-0.19-mRNA-1 transcript=maker-scaffold10x_137_pilon-snap-gene-0.19-mRNA-1 gene=maker-scaffold10x_137_pilon-snap-gene-0.19	1	1	1	1	1	1	1	1	9.21502	Doubtful
16	1	maker-scaffold10x_82_pilon-snap-gene-0.81-mRNA-1 transcript=maker-scaffold10x_82_pilon-snap-gene-0.81-mRNA-1 gene=maker-scaffold10x_82_pilon-snap-gene-0.81				35.9154	100	3.24	667.502	Deamidation of N(N103)	Deamidation of N(1)	Deamidation of Q (Q111-{N106 Q111})	Deamidation of Q (1)	Single Protein		maker-scaffold10x_82_pilon-snap-gene-0.81-mRNA-1 transcript=maker-scaffold10x_82_pilon-snap-gene-0.81-mRNA-1 gene=maker-scaffold10x_82_pilon-snap-gene-0.81	1	2	2	1	2	1	1	2	100	Doubtful
16	3	maker-scaffold10x_250_pilon-snap-gene-0.13-mRNA-1 transcript=maker-scaffold10x_250_pilon-snap-gene-0.13-mRNA-1 gene=maker-scaffold10x_250_pilon-snap-gene-0.13				28.4545	76.59	3.57	950.498					Related Proteins	maker-scaffold10x_2740_pilon-augustus-gene-0.0-mRNA-1 transcript=maker-scaffold10x_2740_pilon-augustus-gene-0.0-mRNA-1 gene=maker-scaffold10x_2740_pilon-augustus-gene-0.0, maker-scaffold10x_2740_pilon-augustus-gene-0.1-mRNA-1 transcript=maker-scaffold10x_2740_pilon-augustus-gene-0.1-mRNA-1 gene=maker-scaffold10x_2740_pilon-augustus-gene-0.1	maker-scaffold10x_250_pilon-snap-gene-0.13-mRNA-1 transcript=maker-scaffold10x_250_pilon-snap-gene-0.13-mRNA-1 gene=maker-scaffold10x_250_pilon-snap-gene-0.13, maker-scaffold10x_2740_pilon-augustus-gene-0.0-mRNA-1 transcript=maker-scaffold10x_2740_pilon-augustus-gene-0.0-mRNA-1 gene=maker-scaffold10x_2740_pilon-augustus-gene-0.0, maker-scaffold10x_2740_pilon-augustus-gene-0.1-mRNA-1 transcript=ma…	1	1	1	1	1	1	1	1	100	Doubtful
16	4	maker-scaffold10x_693_pilon-augustus-gene-0.35-mRNA-1 transcript=maker-scaffold10x_693_pilon-augustus-gene-0.35-mRNA-1 gene=maker-scaffold10x_693_pilon-augustus-gene-0.35				75.1325	66.62	4.23	596.122					Single Protein		maker-scaffold10x_693_pilon-augustus-gene-0.35-mRNA-1 transcript=maker-scaffold10x_693_pilon-augustus-gene-0.35-mRNA-1 gene=maker-scaffold10x_693_pilon-augustus-gene-0.35	2	2	2	2	2	2	2	2	100	Doubtful
16	5	maker-scaffold10x_819_pilon-augustus-gene-0.18-mRNA-1 transcript=maker-scaffold10x_819_pilon-augustus-gene-0.18-mRNA-1 gene=maker-scaffold10x_819_pilon-augustus-gene-0.18				28.8853	85.71	34.13	10484	Oxidation of M(M236, M247)	Oxidation of M(2)	Deamidation of Q (Q186-{Q179 Q184 Q186})	Deamidation of Q (1)	Single Protein		maker-scaffold10x_819_pilon-augustus-gene-0.18-mRNA-1 transcript=maker-scaffold10x_819_pilon-augustus-gene-0.18-mRNA-1 gene=maker-scaffold10x_819_pilon-augustus-gene-0.18	18	24	23	17	23	17	40	45	100	Doubtful
16	6	maker-scaffold10x_383_pilon-snap-gene-1.15-mRNA-1 transcript=maker-scaffold10x_383_pilon-snap-gene-1.15-mRNA-1 gene=maker-scaffold10x_383_pilon-snap-gene-1.15				18.3516	62.5	0	0					Single Protein		maker-scaffold10x_383_pilon-snap-gene-1.15-mRNA-1 transcript=maker-scaffold10x_383_pilon-snap-gene-1.15-mRNA-1 gene=maker-scaffold10x_383_pilon-snap-gene-1.15	0	1	1	0	1	0	1	1	71.4286	Doubtful
16	9	maker-scaffold10x_137_pilon-snap-gene-0.19-mRNA-1 transcript=maker-scaffold10x_137_pilon-snap-gene-0.19-mRNA-1 gene=maker-scaffold10x_137_pilon-snap-gene-0.19				204.281	77.19	0	0					Single Protein		maker-scaffold10x_137_pilon-snap-gene-0.19-mRNA-1 transcript=maker-scaffold10x_137_pilon-snap-gene-0.19-mRNA-1 gene=maker-scaffold10x_137_pilon-snap-gene-0.19	0	2	2	0	2	0	1	2	71.4286	Doubtful
16	11	maker-scaffold10x_1194_pilon-snap-gene-0.52-mRNA-1 transcript=maker-scaffold10x_1194_pilon-snap-gene-0.52-mRNA-1 gene=maker-scaffold10x_1194_pilon-snap-gene-0.52				27.8961	72.22	55.95	6135.62	Deamidation of N(N215); Deamidation of Q(Q112); Oxidation of M(M236, M247)	Deamidation of N(1); Deamidation of Q(1); Oxidation of M(2)	Oxidation of M (M67-{M67 M72})	Oxidation of M (1)	Single Protein		maker-scaffold10x_1194_pilon-snap-gene-0.52-mRNA-1 transcript=maker-scaffold10x_1194_pilon-snap-gene-0.52-mRNA-1 gene=maker-scaffold10x_1194_pilon-snap-gene-0.52	20	29	6	4	6	4	58	61	100	Doubtful
16	12	maker-scaffold10x_685_pilon-snap-gene-0.26-mRNA-1 transcript=maker-scaffold10x_685_pilon-snap-gene-0.26-mRNA-1 gene=maker-scaffold10x_685_pilon-snap-gene-0.26				36.9567	63.8	14.72	1639.49			Oxidation of M (M141-{M141 M146})	Oxidation of M (1)	Single Protein		maker-scaffold10x_685_pilon-snap-gene-0.26-mRNA-1 transcript=maker-scaffold10x_685_pilon-snap-gene-0.26-mRNA-1 gene=maker-scaffold10x_685_pilon-snap-gene-0.26	6	11	2	0	2	0	22	24	71.4286	Doubtful
16	13	maker-scaffold10x_1194_pilon-snap-gene-0.35-mRNA-1 transcript=maker-scaffold10x_1194_pilon-snap-gene-0.35-mRNA-1 gene=maker-scaffold10x_1194_pilon-snap-gene-0.35				47.4948	79.52	32.05	4131	Deamidation of N(N289, N326); Deamidation of Q(Q186)	Deamidation of N(2); Deamidation of Q(1)	Deamidation of Q (Q260-{Q258 Q260}), Oxidation of M (M141-{M141 M146})	Deamidation of Q (1), Oxidation of M (1)	Single Protein		maker-scaffold10x_1194_pilon-snap-gene-0.35-mRNA-1 transcript=maker-scaffold10x_1194_pilon-snap-gene-0.35-mRNA-1 gene=maker-scaffold10x_1194_pilon-snap-gene-0.35	19	26	2	2	2	2	55	56	100	Doubtful
16	14	maker-scaffold10x_1213_pilon-augustus-gene-0.9-mRNA-1 transcript=maker-scaffold10x_1213_pilon-augustus-gene-0.9-mRNA-1 gene=maker-scaffold10x_1213_pilon-augustus-gene-0.9				67.1521	53.5	1.67	488.763					Single Protein		maker-scaffold10x_1213_pilon-augustus-gene-0.9-mRNA-1 transcript=maker-scaffold10x_1213_pilon-augustus-gene-0.9-mRNA-1 gene=maker-scaffold10x_1213_pilon-augustus-gene-0.9	1	1	1	1	1	1	1	1	100	Doubtful
16	15	maker-scaffold10x_439_pilon-augustus-gene-0.21-mRNA-1 transcript=maker-scaffold10x_439_pilon-augustus-gene-0.21-mRNA-1 gene=maker-scaffold10x_439_pilon-augustus-gene-0.21				27.2487	74.07	5.76	1145.88					Single Protein		maker-scaffold10x_439_pilon-augustus-gene-0.21-mRNA-1 transcript=maker-scaffold10x_439_pilon-augustus-gene-0.21-mRNA-1 gene=maker-scaffold10x_439_pilon-augustus-gene-0.21	1	2	2	1	2	1	2	2	100	Doubtful
16	18	maker-scaffold10x_147_pilon-snap-gene-0.16-mRNA-1 transcript=maker-scaffold10x_147_pilon-snap-gene-0.16-mRNA-1 gene=maker-scaffold10x_147_pilon-snap-gene-0.16				45.3912	92.73	13.78	3489.33					Single Protein		maker-scaffold10x_147_pilon-snap-gene-0.16-mRNA-1 transcript=maker-scaffold10x_147_pilon-snap-gene-0.16-mRNA-1 gene=maker-scaffold10x_147_pilon-snap-gene-0.16	5	6	3	3	4	3	20	20	100	Doubtful
19	1	maker-scaffold10x_819_pilon-augustus-gene-0.18-mRNA-1 transcript=maker-scaffold10x_819_pilon-augustus-gene-0.18-mRNA-1 gene=maker-scaffold10x_819_pilon-augustus-gene-0.18				28.8853	85.71	6.75	1425.37					Single Protein		maker-scaffold10x_819_pilon-augustus-gene-0.18-mRNA-1 transcript=maker-scaffold10x_819_pilon-augustus-gene-0.18-mRNA-1 gene=maker-scaffold10x_819_pilon-augustus-gene-0.18	1	1	1	1	1	1	1	1	100	Doubtful
19	3	maker-scaffold10x_145_pilon-snap-gene-2.172-mRNA-1 transcript=maker-scaffold10x_145_pilon-snap-gene-2.172-mRNA-1 gene=maker-scaffold10x_145_pilon-snap-gene-2.172				156.08	66.55	0.7	0					Single Protein		maker-scaffold10x_145_pilon-snap-gene-2.172-mRNA-1 transcript=maker-scaffold10x_145_pilon-snap-gene-2.172-mRNA-1 gene=maker-scaffold10x_145_pilon-snap-gene-2.172	1	1	1	1	1	1	0	2	100	Doubtful
19	4	maker-scaffold10x_1194_pilon-snap-gene-0.52-mRNA-1 transcript=maker-scaffold10x_1194_pilon-snap-gene-0.52-mRNA-1 gene=maker-scaffold10x_1194_pilon-snap-gene-0.52				27.8961	72.22	56.75	14849.1	Deamidation of N(N133, N215); Deamidation of Q(Q135); Oxidation of M(M72, M236, M247)	Deamidation of N(2); Deamidation of Q(1); Oxidation of M(3)			Single Protein		maker-scaffold10x_1194_pilon-snap-gene-0.52-mRNA-1 transcript=maker-scaffold10x_1194_pilon-snap-gene-0.52-mRNA-1 gene=maker-scaffold10x_1194_pilon-snap-gene-0.52	24	28	8	8	8	8	46	58	100	Doubtful
19	5	maker-scaffold10x_685_pilon-snap-gene-0.26-mRNA-1 transcript=maker-scaffold10x_685_pilon-snap-gene-0.26-mRNA-1 gene=maker-scaffold10x_685_pilon-snap-gene-0.26				36.9567	79.75	33.13	4432.17	Oxidation of M(M146)	Oxidation of M(1)			Single Protein		maker-scaffold10x_685_pilon-snap-gene-0.26-mRNA-1 transcript=maker-scaffold10x_685_pilon-snap-gene-0.26-mRNA-1 gene=maker-scaffold10x_685_pilon-snap-gene-0.26	11	13	5	4	5	4	19	22	100	Doubtful
19	6	maker-scaffold10x_1194_pilon-snap-gene-0.35-mRNA-1 transcript=maker-scaffold10x_1194_pilon-snap-gene-0.35-mRNA-1 gene=maker-scaffold10x_1194_pilon-snap-gene-0.35				47.4948	91.57	33.73	7527.96	Deamidation of N(N289, N326); Deamidation of Q(Q258); Oxidation of M(M146)	Deamidation of N(2); Deamidation of Q(1); Oxidation of M(1)			Single Protein		maker-scaffold10x_1194_pilon-snap-gene-0.35-mRNA-1 transcript=maker-scaffold10x_1194_pilon-snap-gene-0.35-mRNA-1 gene=maker-scaffold10x_1194_pilon-snap-gene-0.35	19	24	2	2	2	2	42	52	100	Doubtful
19	7	maker-scaffold10x_1092_pilon-snap-gene-0.4-mRNA-1 transcript=maker-scaffold10x_1092_pilon-snap-gene-0.4-mRNA-1 gene=maker-scaffold10x_1092_pilon-snap-gene-0.4				494.2	91.55	0.32	77.6495	Deamidation of N(N1234); Deamidation of Q(Q1231); Oxidation of M(M1233)	Deamidation of N(1); Deamidation of Q(1); Oxidation of M(1)			Single Protein		maker-scaffold10x_1092_pilon-snap-gene-0.4-mRNA-1 transcript=maker-scaffold10x_1092_pilon-snap-gene-0.4-mRNA-1 gene=maker-scaffold10x_1092_pilon-snap-gene-0.4	1	1	1	1	1	1	1	1	100	Doubtful
19	9	maker-scaffold10x_281_pilon-snap-gene-0.169-mRNA-1 transcript=maker-scaffold10x_281_pilon-snap-gene-0.169-mRNA-1 gene=maker-scaffold10x_281_pilon-snap-gene-0.169				63.6612	93.37	1.79	0	Deamidation of N(N409); Oxidation of M(M405)	Deamidation of N(1); Oxidation of M(1)			Single Protein		maker-scaffold10x_281_pilon-snap-gene-0.169-mRNA-1 transcript=maker-scaffold10x_281_pilon-snap-gene-0.169-mRNA-1 gene=maker-scaffold10x_281_pilon-snap-gene-0.169	1	1	1	1	1	1	0	1	100	Doubtful
19	10	maker-scaffold10x_1010_pilon-snap-gene-0.110-mRNA-1 transcript=maker-scaffold10x_1010_pilon-snap-gene-0.110-mRNA-1 gene=maker-scaffold10x_1010_pilon-snap-gene-0.110				126.687	85.04	0.77	311.305	Deamidation of N(N629)	Deamidation of N(1)			Single Protein		maker-scaffold10x_1010_pilon-snap-gene-0.110-mRNA-1 transcript=maker-scaffold10x_1010_pilon-snap-gene-0.110-mRNA-1 gene=maker-scaffold10x_1010_pilon-snap-gene-0.110	1	1	1	1	1	1	1	1	100	Doubtful
19	11	maker-scaffold10x_147_pilon-snap-gene-0.16-mRNA-1 transcript=maker-scaffold10x_147_pilon-snap-gene-0.16-mRNA-1 gene=maker-scaffold10x_147_pilon-snap-gene-0.16				45.3912	100	18.8	2404.91					Single Protein		maker-scaffold10x_147_pilon-snap-gene-0.16-mRNA-1 transcript=maker-scaffold10x_147_pilon-snap-gene-0.16-mRNA-1 gene=maker-scaffold10x_147_pilon-snap-gene-0.16	4	6	4	3	4	3	14	18	100	Doubtful
19	14	maker-scaffold10x_2740_pilon-augustus-gene-0.0-mRNA-1 transcript=maker-scaffold10x_2740_pilon-augustus-gene-0.0-mRNA-1 gene=maker-scaffold10x_2740_pilon-augustus-gene-0.0				42.1067	81.74	4.9	205.254					Related Proteins	maker-scaffold10x_250_pilon-snap-gene-0.13-mRNA-1 transcript=maker-scaffold10x_250_pilon-snap-gene-0.13-mRNA-1 gene=maker-scaffold10x_250_pilon-snap-gene-0.13, maker-scaffold10x_2740_pilon-augustus-gene-0.1-mRNA-1 transcript=maker-scaffold10x_2740_pilon-augustus-gene-0.1-mRNA-1 gene=maker-scaffold10x_2740_pilon-augustus-gene-0.1	maker-scaffold10x_250_pilon-snap-gene-0.13-mRNA-1 transcript=maker-scaffold10x_250_pilon-snap-gene-0.13-mRNA-1 gene=maker-scaffold10x_250_pilon-snap-gene-0.13, maker-scaffold10x_2740_pilon-augustus-gene-0.0-mRNA-1 transcript=maker-scaffold10x_2740_pilon-augustus-gene-0.0-mRNA-1 gene=maker-scaffold10x_2740_pilon-augustus-gene-0.0, maker-scaffold10x_2740_pilon-augustus-gene-0.1-mRNA-1 transcript=ma…	1	1	0	0	1	1	1	1	100	Doubtful
20	2	maker-scaffold10x_2740_pilon-augustus-gene-0.1-mRNA-1 transcript=maker-scaffold10x_2740_pilon-augustus-gene-0.1-mRNA-1 gene=maker-scaffold10x_2740_pilon-augustus-gene-0.1				23.0584	100	8	6720.3					Single Protein		maker-scaffold10x_2740_pilon-augustus-gene-0.1-mRNA-1 transcript=maker-scaffold10x_2740_pilon-augustus-gene-0.1-mRNA-1 gene=maker-scaffold10x_2740_pilon-augustus-gene-0.1	1	1	1	1	1	1	3	5	19.4444	Doubtful
20	3	maker-scaffold10x_1194_pilon-snap-gene-0.52-mRNA-1 transcript=maker-scaffold10x_1194_pilon-snap-gene-0.52-mRNA-1 gene=maker-scaffold10x_1194_pilon-snap-gene-0.52				27.8961	72.22	38.1	8508.36	Deamidation of N(N215, N235); Oxidation of M(M236, M247)	Deamidation of N(2); Oxidation of M(2)			Single Protein		maker-scaffold10x_1194_pilon-snap-gene-0.52-mRNA-1 transcript=maker-scaffold10x_1194_pilon-snap-gene-0.52-mRNA-1 gene=maker-scaffold10x_1194_pilon-snap-gene-0.52	12	15	5	4	5	4	24	30	19.4444	Doubtful
20	4	maker-scaffold10x_685_pilon-snap-gene-0.26-mRNA-1 transcript=maker-scaffold10x_685_pilon-snap-gene-0.26-mRNA-1 gene=maker-scaffold10x_685_pilon-snap-gene-0.26				36.9567	79.75	13.5	4381.73					Single Protein		maker-scaffold10x_685_pilon-snap-gene-0.26-mRNA-1 transcript=maker-scaffold10x_685_pilon-snap-gene-0.26-mRNA-1 gene=maker-scaffold10x_685_pilon-snap-gene-0.26	3	6	4	1	4	1	5	10	19.4444	Doubtful
20	5	maker-scaffold10x_1194_pilon-snap-gene-0.35-mRNA-1 transcript=maker-scaffold10x_1194_pilon-snap-gene-0.35-mRNA-1 gene=maker-scaffold10x_1194_pilon-snap-gene-0.35				47.4948	91.57	26.51	9415.06	Deamidation of N(N326)	Deamidation of N(1)			Single Protein		maker-scaffold10x_1194_pilon-snap-gene-0.35-mRNA-1 transcript=maker-scaffold10x_1194_pilon-snap-gene-0.35-mRNA-1 gene=maker-scaffold10x_1194_pilon-snap-gene-0.35	10	13	4	3	4	3	27	36	19.4444	Doubtful
20	6	augustus_masked-scaffold10x_436_pilon-processed-gene-0.81-mRNA-1 transcript=augustus_masked-scaffold10x_436_pilon-processed-gene-0.81-mRNA-1 gene=augustus_masked-scaffold10x_436_pilon-processed-gene-0.81				74.9392	89.94	1.37	0			Deamidation of Q (Q17-{Q17 Q20 Q23})	Deamidation of Q (1)	Single Protein		augustus_masked-scaffold10x_436_pilon-processed-gene-0.81-mRNA-1 transcript=augustus_masked-scaffold10x_436_pilon-processed-gene-0.81-mRNA-1 gene=augustus_masked-scaffold10x_436_pilon-processed-gene-0.81	1	1	1	1	1	1	0	1	19.4444	Doubtful
23	4	maker-scaffold10x_819_pilon-augustus-gene-0.18-mRNA-1 transcript=maker-scaffold10x_819_pilon-augustus-gene-0.18-mRNA-1 gene=maker-scaffold10x_819_pilon-augustus-gene-0.18				28.8853	76.59	16.27	2226.72	Deamidation of N(N235); Oxidation of M(M236, M247)	Deamidation of N(1); Oxidation of M(2)			Single Protein		maker-scaffold10x_819_pilon-augustus-gene-0.18-mRNA-1 transcript=maker-scaffold10x_819_pilon-augustus-gene-0.18-mRNA-1 gene=maker-scaffold10x_819_pilon-augustus-gene-0.18	7	7	5	5	5	5	7	7	100	Doubtful
23	5	maker-scaffold10x_2740_pilon-augustus-gene-0.1-mRNA-1 transcript=maker-scaffold10x_2740_pilon-augustus-gene-0.1-mRNA-1 gene=maker-scaffold10x_2740_pilon-augustus-gene-0.1				23.0584	65	12.5	3668.4					Single Protein		maker-scaffold10x_2740_pilon-augustus-gene-0.1-mRNA-1 transcript=maker-scaffold10x_2740_pilon-augustus-gene-0.1-mRNA-1 gene=maker-scaffold10x_2740_pilon-augustus-gene-0.1	6	7	5	4	5	4	12	15	100	Doubtful
23	9	maker-scaffold10x_137_pilon-snap-gene-0.19-mRNA-1 transcript=maker-scaffold10x_137_pilon-snap-gene-0.19-mRNA-1 gene=maker-scaffold10x_137_pilon-snap-gene-0.19				204.281	77.19	0.49	116.702					Single Protein		maker-scaffold10x_137_pilon-snap-gene-0.19-mRNA-1 transcript=maker-scaffold10x_137_pilon-snap-gene-0.19-mRNA-1 gene=maker-scaffold10x_137_pilon-snap-gene-0.19	1	1	1	1	1	1	1	1	100	Doubtful
23	11	augustus_masked-scaffold10x_1084_pilon-processed-gene-0.111-mRNA-1 transcript=augustus_masked-scaffold10x_1084_pilon-processed-gene-0.111-mRNA-1 gene=augustus_masked-scaffold10x_1084_pilon-processed-gene-0.111				37.1208	77.68	3.27	289.671			Deamidation of N (N206-{N206 N207})	Deamidation of N (1)	Related Proteins	augustus_masked-scaffold10x_267_pilon-processed-gene-0.68-mRNA-1 transcript=augustus_masked-scaffold10x_267_pilon-processed-gene-0.68-mRNA-1 gene=augustus_masked-scaffold10x_267_pilon-processed-gene-0.68, maker-scaffold10x_1542_pilon-snap-gene-0.12-mRNA-1 transcript=maker-scaffold10x_1542_pilon-snap-gene-0.12-mRNA-1 gene=maker-scaffold10x_1542_pilon-snap-gene-0.12, maker-scaffold10x_53_pilon-snap…	augustus_masked-scaffold10x_1084_pilon-processed-gene-0.111-mRNA-1 transcript=augustus_masked-scaffold10x_1084_pilon-processed-gene-0.111-mRNA-1 gene=augustus_masked-scaffold10x_1084_pilon-processed-gene-0.111, augustus_masked-scaffold10x_267_pilon-processed-gene-0.68-mRNA-1 transcript=augustus_masked-scaffold10x_267_pilon-processed-gene-0.68-mRNA-1 gene=augustus_masked-scaffold10x_267_pilon-proc…	1	1	0	0	1	1	1	1	100	Doubtful
23	13	maker-scaffold10x_2285_pilon-snap-gene-0.13-mRNA-1 transcript=maker-scaffold10x_2285_pilon-snap-gene-0.13-mRNA-1 gene=maker-scaffold10x_2285_pilon-snap-gene-0.13				23.777	88.67	5.91	958.912					Related Proteins	maker-scaffold10x_490_pilon-snap-gene-0.8-mRNA-1 transcript=maker-scaffold10x_490_pilon-snap-gene-0.8-mRNA-1 gene=maker-scaffold10x_490_pilon-snap-gene-0.8	maker-scaffold10x_2285_pilon-snap-gene-0.13-mRNA-1 transcript=maker-scaffold10x_2285_pilon-snap-gene-0.13-mRNA-1 gene=maker-scaffold10x_2285_pilon-snap-gene-0.13, maker-scaffold10x_490_pilon-snap-gene-0.8-mRNA-1 transcript=maker-scaffold10x_490_pilon-snap-gene-0.8-mRNA-1 gene=maker-scaffold10x_490_pilon-snap-gene-0.8	1	1	1	1	1	1	1	1	100	Doubtful
23	14	maker-scaffold10x_1194_pilon-snap-gene-0.52-mRNA-1 transcript=maker-scaffold10x_1194_pilon-snap-gene-0.52-mRNA-1 gene=maker-scaffold10x_1194_pilon-snap-gene-0.52				27.8961	53.97	46.43	3496.37	Deamidation of N(N235); Deamidation of Q(Q70); Oxidation of M(M67, M72, M236, M247)	Deamidation of N(1); Deamidation of Q(1); Oxidation of M(4)	Deamidation of Q (Q108-{N105 Q108})	Deamidation of Q (1)	Single Protein		maker-scaffold10x_1194_pilon-snap-gene-0.52-mRNA-1 transcript=maker-scaffold10x_1194_pilon-snap-gene-0.52-mRNA-1 gene=maker-scaffold10x_1194_pilon-snap-gene-0.52	19	19	5	5	5	5	26	26	100	Doubtful
23	15	maker-scaffold10x_685_pilon-snap-gene-0.26-mRNA-1 transcript=maker-scaffold10x_685_pilon-snap-gene-0.26-mRNA-1 gene=maker-scaffold10x_685_pilon-snap-gene-0.26				36.9567	49.69	19.33	1966.34	Deamidation of Q(Q144); Oxidation of M(M141, M146, M177)	Deamidation of Q(1); Oxidation of M(3)			Single Protein		maker-scaffold10x_685_pilon-snap-gene-0.26-mRNA-1 transcript=maker-scaffold10x_685_pilon-snap-gene-0.26-mRNA-1 gene=maker-scaffold10x_685_pilon-snap-gene-0.26	12	12	3	3	3	3	13	13	100	Doubtful
23	16	maker-scaffold10x_1194_pilon-snap-gene-0.35-mRNA-1 transcript=maker-scaffold10x_1194_pilon-snap-gene-0.35-mRNA-1 gene=maker-scaffold10x_1194_pilon-snap-gene-0.35				47.4948	62.89	24.58	1251.04	Deamidation of N(N289); Deamidation of Q(Q144); Oxidation of M(M141, M146)	Deamidation of N(1); Deamidation of Q(1); Oxidation of M(2)			Single Protein		maker-scaffold10x_1194_pilon-snap-gene-0.35-mRNA-1 transcript=maker-scaffold10x_1194_pilon-snap-gene-0.35-mRNA-1 gene=maker-scaffold10x_1194_pilon-snap-gene-0.35	16	16	1	1	1	1	24	24	100	Doubtful
23	19	maker-scaffold10x_439_pilon-augustus-gene-0.21-mRNA-1 transcript=maker-scaffold10x_439_pilon-augustus-gene-0.21-mRNA-1 gene=maker-scaffold10x_439_pilon-augustus-gene-0.21				27.2487	74.07	16.05	2685.58			Deamidation of N (N189-{Q185 N189})	Deamidation of N (1)	Single Protein		maker-scaffold10x_439_pilon-augustus-gene-0.21-mRNA-1 transcript=maker-scaffold10x_439_pilon-augustus-gene-0.21-mRNA-1 gene=maker-scaffold10x_439_pilon-augustus-gene-0.21	5	7	7	5	7	5	6	9	100	Doubtful
23	23	maker-scaffold10x_147_pilon-snap-gene-0.16-mRNA-1 transcript=maker-scaffold10x_147_pilon-snap-gene-0.16-mRNA-1 gene=maker-scaffold10x_147_pilon-snap-gene-0.16				45.3912	63.91	9.27	971.3					Single Protein		maker-scaffold10x_147_pilon-snap-gene-0.16-mRNA-1 transcript=maker-scaffold10x_147_pilon-snap-gene-0.16-mRNA-1 gene=maker-scaffold10x_147_pilon-snap-gene-0.16	5	5	3	3	3	3	5	5	100	Doubtful
23	24	maker-scaffold10x_2740_pilon-augustus-gene-0.0-mRNA-1 transcript=maker-scaffold10x_2740_pilon-augustus-gene-0.0-mRNA-1 gene=maker-scaffold10x_2740_pilon-augustus-gene-0.0				42.1067	62.67	17.17	1546.75	Deamidation of N(N330)	Deamidation of N(1)			Single Protein		maker-scaffold10x_2740_pilon-augustus-gene-0.0-mRNA-1 transcript=maker-scaffold10x_2740_pilon-augustus-gene-0.0-mRNA-1 gene=maker-scaffold10x_2740_pilon-augustus-gene-0.0	10	10	2	2	2	2	15	16	100	Doubtful
24	4	maker-scaffold10x_1573_pilon-snap-gene-0.39-mRNA-1 transcript=maker-scaffold10x_1573_pilon-snap-gene-0.39-mRNA-1 gene=maker-scaffold10x_1573_pilon-snap-gene-0.39				35.3648	100	2.95	942.15					Single Protein		maker-scaffold10x_1573_pilon-snap-gene-0.39-mRNA-1 transcript=maker-scaffold10x_1573_pilon-snap-gene-0.39-mRNA-1 gene=maker-scaffold10x_1573_pilon-snap-gene-0.39	1	1	1	1	1	1	1	2	100	Doubtful
24	5	maker-scaffold10x_819_pilon-augustus-gene-0.18-mRNA-1 transcript=maker-scaffold10x_819_pilon-augustus-gene-0.18-mRNA-1 gene=maker-scaffold10x_819_pilon-augustus-gene-0.18				28.8853	67.86	6.35	1330.35					Single Protein		maker-scaffold10x_819_pilon-augustus-gene-0.18-mRNA-1 transcript=maker-scaffold10x_819_pilon-augustus-gene-0.18-mRNA-1 gene=maker-scaffold10x_819_pilon-augustus-gene-0.18	1	2	2	1	2	1	1	2	100	Doubtful
24	6	maker-scaffold10x_2740_pilon-augustus-gene-0.1-mRNA-1 transcript=maker-scaffold10x_2740_pilon-augustus-gene-0.1-mRNA-1 gene=maker-scaffold10x_2740_pilon-augustus-gene-0.1				23.0584	65	12.5	3591.95					Single Protein		maker-scaffold10x_2740_pilon-augustus-gene-0.1-mRNA-1 transcript=maker-scaffold10x_2740_pilon-augustus-gene-0.1-mRNA-1 gene=maker-scaffold10x_2740_pilon-augustus-gene-0.1	2	2	2	2	2	2	3	3	100	Doubtful
24	8	maker-scaffold10x_37_pilon-augustus-gene-0.7-mRNA-1 transcript=maker-scaffold10x_37_pilon-augustus-gene-0.7-mRNA-1 gene=maker-scaffold10x_37_pilon-augustus-gene-0.7				33.7469	60.73	2.97	1105.21	Deamidation of Q(Q179)	Deamidation of Q(1)			Single Protein		maker-scaffold10x_37_pilon-augustus-gene-0.7-mRNA-1 transcript=maker-scaffold10x_37_pilon-augustus-gene-0.7-mRNA-1 gene=maker-scaffold10x_37_pilon-augustus-gene-0.7	1	1	1	1	1	1	1	1	100	Doubtful
24	11	maker-scaffold10x_1189_pilon-snap-gene-0.91-mRNA-1 transcript=maker-scaffold10x_1189_pilon-snap-gene-0.91-mRNA-1 gene=maker-scaffold10x_1189_pilon-snap-gene-0.91				24.583	77.98	4.59	1318.15	Deamidation of Q(Q14); Oxidation of M(M15)	Deamidation of Q(1); Oxidation of M(1)			Single Protein		maker-scaffold10x_1189_pilon-snap-gene-0.91-mRNA-1 transcript=maker-scaffold10x_1189_pilon-snap-gene-0.91-mRNA-1 gene=maker-scaffold10x_1189_pilon-snap-gene-0.91	1	1	1	1	1	1	1	1	92.3077	Doubtful
24	12	augustus_masked-scaffold10x_267_pilon-processed-gene-0.68-mRNA-1 transcript=augustus_masked-scaffold10x_267_pilon-processed-gene-0.68-mRNA-1 gene=augustus_masked-scaffold10x_267_pilon-processed-gene-0.68				72.118	69.02	1.84	462.731					Single Protein		augustus_masked-scaffold10x_267_pilon-processed-gene-0.68-mRNA-1 transcript=augustus_masked-scaffold10x_267_pilon-processed-gene-0.68-mRNA-1 gene=augustus_masked-scaffold10x_267_pilon-processed-gene-0.68	1	2	1	1	2	1	1	2	100	Doubtful
24	13	augustus_masked-scaffold10x_269_pilon-processed-gene-0.18-mRNA-1 transcript=augustus_masked-scaffold10x_269_pilon-processed-gene-0.18-mRNA-1 gene=augustus_masked-scaffold10x_269_pilon-processed-gene-0.18				41.6188	64.63	8.78	496.759					Related Proteins	augustus_masked-scaffold10x_269_pilon-processed-gene-0.22-mRNA-1 transcript=augustus_masked-scaffold10x_269_pilon-processed-gene-0.22-mRNA-1 gene=augustus_masked-scaffold10x_269_pilon-processed-gene-0.22, augustus_masked-scaffold10x_502_pilon-processed-gene-0.29-mRNA-1 transcript=augustus_masked-scaffold10x_502_pilon-processed-gene-0.29-mRNA-1 gene=augustus_masked-scaffold10x_502_pilon-processed-…	augustus_masked-scaffold10x_269_pilon-processed-gene-0.18-mRNA-1 transcript=augustus_masked-scaffold10x_269_pilon-processed-gene-0.18-mRNA-1 gene=augustus_masked-scaffold10x_269_pilon-processed-gene-0.18, augustus_masked-scaffold10x_269_pilon-processed-gene-0.22-mRNA-1 transcript=augustus_masked-scaffold10x_269_pilon-processed-gene-0.22-mRNA-1 gene=augustus_masked-scaffold10x_269_pilon-processed-…	4	4	0	0	4	4	5	5	100	Doubtful
24	14	maker-scaffold10x_1013_pilon-snap-gene-0.133-mRNA-1 transcript=maker-scaffold10x_1013_pilon-snap-gene-0.133-mRNA-1 gene=maker-scaffold10x_1013_pilon-snap-gene-0.133				16.8109	75.17	19.46	3848.52	Deamidation of N(N98)	Deamidation of N(1)			Related Proteins	maker-scaffold10x_208_pilon-snap-gene-0.18-mRNA-1 transcript=maker-scaffold10x_208_pilon-snap-gene-0.18-mRNA-1 gene=maker-scaffold10x_208_pilon-snap-gene-0.18	maker-scaffold10x_1013_pilon-snap-gene-0.133-mRNA-1 transcript=maker-scaffold10x_1013_pilon-snap-gene-0.133-mRNA-1 gene=maker-scaffold10x_1013_pilon-snap-gene-0.133, maker-scaffold10x_208_pilon-snap-gene-0.18-mRNA-1 transcript=maker-scaffold10x_208_pilon-snap-gene-0.18-mRNA-1 gene=maker-scaffold10x_208_pilon-snap-gene-0.18	2	3	3	2	3	2	2	3	100	Doubtful
24	16	maker-scaffold10x_466_pilon-snap-gene-0.92-mRNA-1 transcript=maker-scaffold10x_466_pilon-snap-gene-0.92-mRNA-1 gene=maker-scaffold10x_466_pilon-snap-gene-0.92				48.1419	58.14	2.09	0	Oxidation of M(M261)	Oxidation of M(1)			Single Protein		maker-scaffold10x_466_pilon-snap-gene-0.92-mRNA-1 transcript=maker-scaffold10x_466_pilon-snap-gene-0.92-mRNA-1 gene=maker-scaffold10x_466_pilon-snap-gene-0.92	1	1	1	1	1	1	0	2	100	Doubtful
24	17	maker-scaffold10x_14_pilon-pred_gff_StringTie-gene-0.66-mRNA-1 transcript=maker-scaffold10x_14_pilon-pred_gff_StringTie-gene-0.66-mRNA-1 gene=maker-scaffold10x_14_pilon-pred_gff_StringTie-gene-0.66				18.8657	22.62	7.14	3056.98			Deamidation of N (N11-{N11 N15})	Deamidation of N (1)	Single Protein		maker-scaffold10x_14_pilon-pred_gff_StringTie-gene-0.66-mRNA-1 transcript=maker-scaffold10x_14_pilon-pred_gff_StringTie-gene-0.66-mRNA-1 gene=maker-scaffold10x_14_pilon-pred_gff_StringTie-gene-0.66	1	1	1	1	1	1	1	1	100	Doubtful
24	18	maker-scaffold10x_439_pilon-augustus-gene-0.21-mRNA-1 transcript=maker-scaffold10x_439_pilon-augustus-gene-0.21-mRNA-1 gene=maker-scaffold10x_439_pilon-augustus-gene-0.21				27.2487	65.02	11.52	3724.98					Single Protein		maker-scaffold10x_439_pilon-augustus-gene-0.21-mRNA-1 transcript=maker-scaffold10x_439_pilon-augustus-gene-0.21-mRNA-1 gene=maker-scaffold10x_439_pilon-augustus-gene-0.21	3	6	6	3	6	3	4	8	100	Doubtful
24	19	maker-scaffold10x_457_pilon-snap-gene-0.53-mRNA-1 transcript=maker-scaffold10x_457_pilon-snap-gene-0.53-mRNA-1 gene=maker-scaffold10x_457_pilon-snap-gene-0.53				84.2423	38.26	2.02	0					Single Protein		maker-scaffold10x_457_pilon-snap-gene-0.53-mRNA-1 transcript=maker-scaffold10x_457_pilon-snap-gene-0.53-mRNA-1 gene=maker-scaffold10x_457_pilon-snap-gene-0.53	1	1	1	1	1	1	0	1	92.3077	Doubtful
25	1	maker-scaffold10x_1309_pilon-snap-gene-0.100-mRNA-1 transcript=maker-scaffold10x_1309_pilon-snap-gene-0.100-mRNA-1 gene=maker-scaffold10x_1309_pilon-snap-gene-0.100				12.3116	79.28	0	0					Single Protein		maker-scaffold10x_1309_pilon-snap-gene-0.100-mRNA-1 transcript=maker-scaffold10x_1309_pilon-snap-gene-0.100-mRNA-1 gene=maker-scaffold10x_1309_pilon-snap-gene-0.100	0	2	2	0	2	0	1	2	60	Doubtful
25	2	maker-scaffold10x_1453_pilon-snap-gene-0.18-mRNA-1 transcript=maker-scaffold10x_1453_pilon-snap-gene-0.18-mRNA-1 gene=maker-scaffold10x_1453_pilon-snap-gene-0.18				100.679	49.89	0	0					Single Protein		maker-scaffold10x_1453_pilon-snap-gene-0.18-mRNA-1 transcript=maker-scaffold10x_1453_pilon-snap-gene-0.18-mRNA-1 gene=maker-scaffold10x_1453_pilon-snap-gene-0.18	0	1	1	0	1	0	0	2	100	Doubtful
25	3	maker-scaffold10x_490_pilon-snap-gene-0.8-mRNA-1 transcript=maker-scaffold10x_490_pilon-snap-gene-0.8-mRNA-1 gene=maker-scaffold10x_490_pilon-snap-gene-0.8				36.7394	85.4	36.19	1083.99	Deamidation of Q(Q168, Q265); Oxidation of M(M72, M81, M94, M100, M132, M191, M197, M229)	Deamidation of Q(2); Oxidation of M(8)			Single Protein		maker-scaffold10x_490_pilon-snap-gene-0.8-mRNA-1 transcript=maker-scaffold10x_490_pilon-snap-gene-0.8-mRNA-1 gene=maker-scaffold10x_490_pilon-snap-gene-0.8	13	14	6	6	6	6	23	34	100	Doubtful
25	7	maker-scaffold10x_819_pilon-augustus-gene-0.18-mRNA-1 transcript=maker-scaffold10x_819_pilon-augustus-gene-0.18-mRNA-1 gene=maker-scaffold10x_819_pilon-augustus-gene-0.18				28.8853	67.86	6.35	1857.8					Single Protein		maker-scaffold10x_819_pilon-augustus-gene-0.18-mRNA-1 transcript=maker-scaffold10x_819_pilon-augustus-gene-0.18-mRNA-1 gene=maker-scaffold10x_819_pilon-augustus-gene-0.18	1	1	1	1	1	1	2	2	100	Doubtful
25	10	maker-scaffold10x_137_pilon-snap-gene-0.19-mRNA-1 transcript=maker-scaffold10x_137_pilon-snap-gene-0.19-mRNA-1 gene=maker-scaffold10x_137_pilon-snap-gene-0.19				204.281	75.98	0.49	240.579					Single Protein		maker-scaffold10x_137_pilon-snap-gene-0.19-mRNA-1 transcript=maker-scaffold10x_137_pilon-snap-gene-0.19-mRNA-1 gene=maker-scaffold10x_137_pilon-snap-gene-0.19	1	2	2	1	2	1	2	3	100	Doubtful
25	11	maker-scaffold10x_1184_pilon-snap-gene-0.31-mRNA-1 transcript=maker-scaffold10x_1184_pilon-snap-gene-0.31-mRNA-1 gene=maker-scaffold10x_1184_pilon-snap-gene-0.31				51.1535	84.49	29.89	594.138	Oxidation of M(M25, M34, M47, M53, M202, M211, M224, M230, M321, M327)	Oxidation of M(10)			Single Protein		maker-scaffold10x_1184_pilon-snap-gene-0.31-mRNA-1 transcript=maker-scaffold10x_1184_pilon-snap-gene-0.31-mRNA-1 gene=maker-scaffold10x_1184_pilon-snap-gene-0.31	9	10	2	2	2	2	11	15	100	Doubtful
25	12	maker-scaffold10x_1482_pilon-snap-gene-0.2-mRNA-1 transcript=maker-scaffold10x_1482_pilon-snap-gene-0.2-mRNA-1 gene=maker-scaffold10x_1482_pilon-snap-gene-0.2				100.811	90.29	0	0					Single Protein		maker-scaffold10x_1482_pilon-snap-gene-0.2-mRNA-1 transcript=maker-scaffold10x_1482_pilon-snap-gene-0.2-mRNA-1 gene=maker-scaffold10x_1482_pilon-snap-gene-0.2	0	1	1	0	1	0	0	1	66.6667	Doubtful
25	14	maker-scaffold10x_225_pilon-snap-gene-0.6-mRNA-1 transcript=maker-scaffold10x_225_pilon-snap-gene-0.6-mRNA-1 gene=maker-scaffold10x_225_pilon-snap-gene-0.6				110.684	76.57	0	0					Single Protein		maker-scaffold10x_225_pilon-snap-gene-0.6-mRNA-1 transcript=maker-scaffold10x_225_pilon-snap-gene-0.6-mRNA-1 gene=maker-scaffold10x_225_pilon-snap-gene-0.6	0	1	1	0	1	0	0	2	100	Doubtful
25	15	maker-scaffold10x_145_pilon-snap-gene-2.185-mRNA-1 transcript=maker-scaffold10x_145_pilon-snap-gene-2.185-mRNA-1 gene=maker-scaffold10x_145_pilon-snap-gene-2.185				217.574	57.43	0	0					Single Protein		maker-scaffold10x_145_pilon-snap-gene-2.185-mRNA-1 transcript=maker-scaffold10x_145_pilon-snap-gene-2.185-mRNA-1 gene=maker-scaffold10x_145_pilon-snap-gene-2.185	0	1	1	0	1	0	0	4	100	Doubtful
25	16	maker-scaffold10x_38_pilon-snap-gene-0.22-mRNA-1 transcript=maker-scaffold10x_38_pilon-snap-gene-0.22-mRNA-1 gene=maker-scaffold10x_38_pilon-snap-gene-0.22				62.1511	69.98	0	0					Single Protein		maker-scaffold10x_38_pilon-snap-gene-0.22-mRNA-1 transcript=maker-scaffold10x_38_pilon-snap-gene-0.22-mRNA-1 gene=maker-scaffold10x_38_pilon-snap-gene-0.22	0	1	1	0	1	0	0	2	100	Doubtful
25	18	maker-scaffold10x_439_pilon-augustus-gene-0.21-mRNA-1 transcript=maker-scaffold10x_439_pilon-augustus-gene-0.21-mRNA-1 gene=maker-scaffold10x_439_pilon-augustus-gene-0.21				27.2487	65.02	13.58	4272.95					Single Protein		maker-scaffold10x_439_pilon-augustus-gene-0.21-mRNA-1 transcript=maker-scaffold10x_439_pilon-augustus-gene-0.21-mRNA-1 gene=maker-scaffold10x_439_pilon-augustus-gene-0.21	3	5	5	3	5	3	5	12	100	Doubtful
26	1	maker-scaffold10x_1184_pilon-snap-gene-0.31-mRNA-1 transcript=maker-scaffold10x_1184_pilon-snap-gene-0.31-mRNA-1 gene=maker-scaffold10x_1184_pilon-snap-gene-0.31				51.1535	84.49	20.9	391.348					Single Protein		maker-scaffold10x_1184_pilon-snap-gene-0.31-mRNA-1 transcript=maker-scaffold10x_1184_pilon-snap-gene-0.31-mRNA-1 gene=maker-scaffold10x_1184_pilon-snap-gene-0.31	3	3	3	3	3	3	3	3	100	Doubtful
26	6	maker-scaffold10x_38_pilon-snap-gene-0.22-mRNA-1 transcript=maker-scaffold10x_38_pilon-snap-gene-0.22-mRNA-1 gene=maker-scaffold10x_38_pilon-snap-gene-0.22				62.1511	69.98	1.45	0					Single Protein		maker-scaffold10x_38_pilon-snap-gene-0.22-mRNA-1 transcript=maker-scaffold10x_38_pilon-snap-gene-0.22-mRNA-1 gene=maker-scaffold10x_38_pilon-snap-gene-0.22	1	1	1	1	1	1	0	4	100	Doubtful
26	8	augustus_masked-scaffold10x_269_pilon-processed-gene-0.18-mRNA-1 transcript=augustus_masked-scaffold10x_269_pilon-processed-gene-0.18-mRNA-1 gene=augustus_masked-scaffold10x_269_pilon-processed-gene-0.18				41.6188	64.63	4.26	561.411					Related Proteins	augustus_masked-scaffold10x_269_pilon-processed-gene-0.22-mRNA-1 transcript=augustus_masked-scaffold10x_269_pilon-processed-gene-0.22-mRNA-1 gene=augustus_masked-scaffold10x_269_pilon-processed-gene-0.22, augustus_masked-scaffold10x_502_pilon-processed-gene-0.29-mRNA-1 transcript=augustus_masked-scaffold10x_502_pilon-processed-gene-0.29-mRNA-1 gene=augustus_masked-scaffold10x_502_pilon-processed-…	augustus_masked-scaffold10x_269_pilon-processed-gene-0.18-mRNA-1 transcript=augustus_masked-scaffold10x_269_pilon-processed-gene-0.18-mRNA-1 gene=augustus_masked-scaffold10x_269_pilon-processed-gene-0.18, augustus_masked-scaffold10x_269_pilon-processed-gene-0.22-mRNA-1 transcript=augustus_masked-scaffold10x_269_pilon-processed-gene-0.22-mRNA-1 gene=augustus_masked-scaffold10x_269_pilon-processed-…	1	2	2	1	2	1	1	2	100	Doubtful
26	9	maker-scaffold10x_819_pilon-augustus-gene-0.18-mRNA-1 transcript=maker-scaffold10x_819_pilon-augustus-gene-0.18-mRNA-1 gene=maker-scaffold10x_819_pilon-augustus-gene-0.18				28.8853	67.86	6.35	1954.54					Single Protein		maker-scaffold10x_819_pilon-augustus-gene-0.18-mRNA-1 transcript=maker-scaffold10x_819_pilon-augustus-gene-0.18-mRNA-1 gene=maker-scaffold10x_819_pilon-augustus-gene-0.18	1	1	1	1	1	1	2	2	100	Doubtful
26	10	maker-scaffold10x_439_pilon-augustus-gene-0.21-mRNA-1 transcript=maker-scaffold10x_439_pilon-augustus-gene-0.21-mRNA-1 gene=maker-scaffold10x_439_pilon-augustus-gene-0.21				27.2487	65.02	22.63	4475.9					Single Protein		maker-scaffold10x_439_pilon-augustus-gene-0.21-mRNA-1 transcript=maker-scaffold10x_439_pilon-augustus-gene-0.21-mRNA-1 gene=maker-scaffold10x_439_pilon-augustus-gene-0.21	6	6	6	6	6	6	7	13	100	Doubtful
26	13	maker-scaffold10x_718_pilon-snap-gene-0.9-mRNA-1 transcript=maker-scaffold10x_718_pilon-snap-gene-0.9-mRNA-1 gene=maker-scaffold10x_718_pilon-snap-gene-0.9				25.9683	86.81	27.66	4483.95	Deamidation of N(N41)	Deamidation of N(1)	Deamidation of N (N167-{N167}), Deamidation of Q (Q169-{Q169 N170})	Deamidation of N (1), Deamidation of Q (1)	Single Protein		maker-scaffold10x_718_pilon-snap-gene-0.9-mRNA-1 transcript=maker-scaffold10x_718_pilon-snap-gene-0.9-mRNA-1 gene=maker-scaffold10x_718_pilon-snap-gene-0.9	6	7	7	6	7	6	8	15	100	Doubtful
27	5	maker-scaffold10x_1184_pilon-snap-gene-0.31-mRNA-1 transcript=maker-scaffold10x_1184_pilon-snap-gene-0.31-mRNA-1 gene=maker-scaffold10x_1184_pilon-snap-gene-0.31				51.1535	84.49	8.09	132.026					Related Proteins	maker-scaffold10x_2285_pilon-snap-gene-0.13-mRNA-1 transcript=maker-scaffold10x_2285_pilon-snap-gene-0.13-mRNA-1 gene=maker-scaffold10x_2285_pilon-snap-gene-0.13, maker-scaffold10x_490_pilon-snap-gene-0.5-mRNA-1 transcript=maker-scaffold10x_490_pilon-snap-gene-0.5-mRNA-1 gene=maker-scaffold10x_490_pilon-snap-gene-0.5, maker-scaffold10x_490_pilon-snap-gene-0.8-mRNA-1 transcript=maker-scaffold10x_4…	maker-scaffold10x_1184_pilon-snap-gene-0.31-mRNA-1 transcript=maker-scaffold10x_1184_pilon-snap-gene-0.31-mRNA-1 gene=maker-scaffold10x_1184_pilon-snap-gene-0.31, maker-scaffold10x_2285_pilon-snap-gene-0.13-mRNA-1 transcript=maker-scaffold10x_2285_pilon-snap-gene-0.13-mRNA-1 gene=maker-scaffold10x_2285_pilon-snap-gene-0.13, maker-scaffold10x_490_pilon-snap-gene-0.5-mRNA-1 transcript=maker-scaffol…	1	1	1	1	1	1	1	1	100	Doubtful
27	12	maker-scaffold10x_439_pilon-augustus-gene-0.21-mRNA-1 transcript=maker-scaffold10x_439_pilon-augustus-gene-0.21-mRNA-1 gene=maker-scaffold10x_439_pilon-augustus-gene-0.21				27.2487	65.02	39.92	6496.49	Oxidation of M(M55)	Oxidation of M(1)	Deamidation of Q (Q63-{N59 Q63})	Deamidation of Q (1)	Single Protein		maker-scaffold10x_439_pilon-augustus-gene-0.21-mRNA-1 transcript=maker-scaffold10x_439_pilon-augustus-gene-0.21-mRNA-1 gene=maker-scaffold10x_439_pilon-augustus-gene-0.21	13	13	13	13	13	13	28	37	100	Doubtful
28	1	maker-scaffold10x_2706_pilon-snap-gene-0.15-mRNA-1 transcript=maker-scaffold10x_2706_pilon-snap-gene-0.15-mRNA-1 gene=maker-scaffold10x_2706_pilon-snap-gene-0.15				36.4446	80.71	4.15	744.545					Single Protein		maker-scaffold10x_2706_pilon-snap-gene-0.15-mRNA-1 transcript=maker-scaffold10x_2706_pilon-snap-gene-0.15-mRNA-1 gene=maker-scaffold10x_2706_pilon-snap-gene-0.15	1	1	1	1	1	1	1	1	100	Doubtful
28	3	maker-scaffold10x_327_pilon-snap-gene-0.32-mRNA-1 transcript=maker-scaffold10x_327_pilon-snap-gene-0.32-mRNA-1 gene=maker-scaffold10x_327_pilon-snap-gene-0.32				166.703	78.28	0.62	156.995					Single Protein		maker-scaffold10x_327_pilon-snap-gene-0.32-mRNA-1 transcript=maker-scaffold10x_327_pilon-snap-gene-0.32-mRNA-1 gene=maker-scaffold10x_327_pilon-snap-gene-0.32	1	3	3	1	3	1	2	3	100	Doubtful
28	4	maker-scaffold10x_1194_pilon-snap-gene-0.52-mRNA-1 transcript=maker-scaffold10x_1194_pilon-snap-gene-0.52-mRNA-1 gene=maker-scaffold10x_1194_pilon-snap-gene-0.52				27.8961	53.97	10.32	1223.18	Oxidation of M(M247)	Oxidation of M(1)			Single Protein		maker-scaffold10x_1194_pilon-snap-gene-0.52-mRNA-1 transcript=maker-scaffold10x_1194_pilon-snap-gene-0.52-mRNA-1 gene=maker-scaffold10x_1194_pilon-snap-gene-0.52	2	2	1	1	1	1	1	2	100	Doubtful
28	5	maker-scaffold10x_1194_pilon-snap-gene-0.35-mRNA-1 transcript=maker-scaffold10x_1194_pilon-snap-gene-0.35-mRNA-1 gene=maker-scaffold10x_1194_pilon-snap-gene-0.35				47.4948	57.59	5.3	585.839					Single Protein		maker-scaffold10x_1194_pilon-snap-gene-0.35-mRNA-1 transcript=maker-scaffold10x_1194_pilon-snap-gene-0.35-mRNA-1 gene=maker-scaffold10x_1194_pilon-snap-gene-0.35	2	3	2	1	2	1	1	3	100	Doubtful
28	9	maker-scaffold10x_2740_pilon-augustus-gene-0.1-mRNA-1 transcript=maker-scaffold10x_2740_pilon-augustus-gene-0.1-mRNA-1 gene=maker-scaffold10x_2740_pilon-augustus-gene-0.1				23.0584	65	12.5	1669.64					Single Protein		maker-scaffold10x_2740_pilon-augustus-gene-0.1-mRNA-1 transcript=maker-scaffold10x_2740_pilon-augustus-gene-0.1-mRNA-1 gene=maker-scaffold10x_2740_pilon-augustus-gene-0.1	2	3	3	2	3	2	2	4	100	Doubtful
28	10	maker-scaffold10x_439_pilon-augustus-gene-0.21-mRNA-1 transcript=maker-scaffold10x_439_pilon-augustus-gene-0.21-mRNA-1 gene=maker-scaffold10x_439_pilon-augustus-gene-0.21				27.2487	65.02	16.46	3091.93					Single Protein		maker-scaffold10x_439_pilon-augustus-gene-0.21-mRNA-1 transcript=maker-scaffold10x_439_pilon-augustus-gene-0.21-mRNA-1 gene=maker-scaffold10x_439_pilon-augustus-gene-0.21	4	5	5	4	5	4	5	9	100	Doubtful
28	12	maker-scaffold10x_311_pilon-augustus-gene-0.72-mRNA-1 transcript=maker-scaffold10x_311_pilon-augustus-gene-0.72-mRNA-1 gene=maker-scaffold10x_311_pilon-augustus-gene-0.72				27.7772	80.63	3.16	879.916					Single Protein		maker-scaffold10x_311_pilon-augustus-gene-0.72-mRNA-1 transcript=maker-scaffold10x_311_pilon-augustus-gene-0.72-mRNA-1 gene=maker-scaffold10x_311_pilon-augustus-gene-0.72	1	1	1	1	1	1	1	1	100	Doubtful
28	14	maker-scaffold10x_445_pilon-augustus-gene-0.18-mRNA-1 transcript=maker-scaffold10x_445_pilon-augustus-gene-0.18-mRNA-1 gene=maker-scaffold10x_445_pilon-augustus-gene-0.18				37.1513	67.35	3.24	720.449					Single Protein		maker-scaffold10x_445_pilon-augustus-gene-0.18-mRNA-1 transcript=maker-scaffold10x_445_pilon-augustus-gene-0.18-mRNA-1 gene=maker-scaffold10x_445_pilon-augustus-gene-0.18	1	1	1	1	1	1	1	1	100	Doubtful
29	1	maker-scaffold10x_819_pilon-augustus-gene-0.18-mRNA-1 transcript=maker-scaffold10x_819_pilon-augustus-gene-0.18-mRNA-1 gene=maker-scaffold10x_819_pilon-augustus-gene-0.18				28.8853	85.71	21.83	9749.82	Oxidation of M(M236, M247)	Oxidation of M(2)			Single Protein		maker-scaffold10x_819_pilon-augustus-gene-0.18-mRNA-1 transcript=maker-scaffold10x_819_pilon-augustus-gene-0.18-mRNA-1 gene=maker-scaffold10x_819_pilon-augustus-gene-0.18	7	8	8	7	8	7	7	10	55.5556	Doubtful
29	3	maker-scaffold10x_1194_pilon-snap-gene-0.52-mRNA-1 transcript=maker-scaffold10x_1194_pilon-snap-gene-0.52-mRNA-1 gene=maker-scaffold10x_1194_pilon-snap-gene-0.52				27.8961	72.22	41.67	10157.5	Deamidation of N(N133); Deamidation of Q(Q135); Oxidation of M(M236, M247)	Deamidation of N(1); Deamidation of Q(1); Oxidation of M(2)			Single Protein		maker-scaffold10x_1194_pilon-snap-gene-0.52-mRNA-1 transcript=maker-scaffold10x_1194_pilon-snap-gene-0.52-mRNA-1 gene=maker-scaffold10x_1194_pilon-snap-gene-0.52	9	14	7	4	7	4	15	29	55.5556	Doubtful
29	4	maker-scaffold10x_1194_pilon-snap-gene-0.35-mRNA-1 transcript=maker-scaffold10x_1194_pilon-snap-gene-0.35-mRNA-1 gene=maker-scaffold10x_1194_pilon-snap-gene-0.35				47.4948	91.57	18.55	7496.81					Single Protein		maker-scaffold10x_1194_pilon-snap-gene-0.35-mRNA-1 transcript=maker-scaffold10x_1194_pilon-snap-gene-0.35-mRNA-1 gene=maker-scaffold10x_1194_pilon-snap-gene-0.35	6	10	3	1	3	1	13	28	55.5556	Doubtful
29	5	maker-scaffold10x_445_pilon-augustus-gene-0.18-mRNA-1 transcript=maker-scaffold10x_445_pilon-augustus-gene-0.18-mRNA-1 gene=maker-scaffold10x_445_pilon-augustus-gene-0.18				37.1513	90.88	3.24	2329.11					Single Protein		maker-scaffold10x_445_pilon-augustus-gene-0.18-mRNA-1 transcript=maker-scaffold10x_445_pilon-augustus-gene-0.18-mRNA-1 gene=maker-scaffold10x_445_pilon-augustus-gene-0.18	1	1	1	1	1	1	1	1	55.5556	Doubtful
29	7	maker-scaffold10x_147_pilon-snap-gene-0.16-mRNA-1 transcript=maker-scaffold10x_147_pilon-snap-gene-0.16-mRNA-1 gene=maker-scaffold10x_147_pilon-snap-gene-0.16				45.3912	100	11.28	1503.12					Single Protein		maker-scaffold10x_147_pilon-snap-gene-0.16-mRNA-1 transcript=maker-scaffold10x_147_pilon-snap-gene-0.16-mRNA-1 gene=maker-scaffold10x_147_pilon-snap-gene-0.16	3	5	4	2	4	2	2	7	55.5556	Doubtful
30	5	augustus_masked-scaffold10x_269_pilon-processed-gene-0.18-mRNA-1 transcript=augustus_masked-scaffold10x_269_pilon-processed-gene-0.18-mRNA-1 gene=augustus_masked-scaffold10x_269_pilon-processed-gene-0.18				41.6188	64.63	4.26	369.842					Related Proteins	augustus_masked-scaffold10x_269_pilon-processed-gene-0.22-mRNA-1 transcript=augustus_masked-scaffold10x_269_pilon-processed-gene-0.22-mRNA-1 gene=augustus_masked-scaffold10x_269_pilon-processed-gene-0.22, augustus_masked-scaffold10x_502_pilon-processed-gene-0.29-mRNA-1 transcript=augustus_masked-scaffold10x_502_pilon-processed-gene-0.29-mRNA-1 gene=augustus_masked-scaffold10x_502_pilon-processed-…	augustus_masked-scaffold10x_269_pilon-processed-gene-0.18-mRNA-1 transcript=augustus_masked-scaffold10x_269_pilon-processed-gene-0.18-mRNA-1 gene=augustus_masked-scaffold10x_269_pilon-processed-gene-0.18, augustus_masked-scaffold10x_269_pilon-processed-gene-0.22-mRNA-1 transcript=augustus_masked-scaffold10x_269_pilon-processed-gene-0.22-mRNA-1 gene=augustus_masked-scaffold10x_269_pilon-processed-…	1	1	0	0	1	1	1	1	100	Doubtful
30	8	maker-scaffold10x_439_pilon-augustus-gene-0.21-mRNA-1 transcript=maker-scaffold10x_439_pilon-augustus-gene-0.21-mRNA-1 gene=maker-scaffold10x_439_pilon-augustus-gene-0.21				27.2487	65.02	5.76	1545.12					Single Protein		maker-scaffold10x_439_pilon-augustus-gene-0.21-mRNA-1 transcript=maker-scaffold10x_439_pilon-augustus-gene-0.21-mRNA-1 gene=maker-scaffold10x_439_pilon-augustus-gene-0.21	1	2	2	1	2	1	1	2	100	Doubtful
30	14	maker-scaffold10x_137_pilon-snap-gene-0.19-mRNA-1 transcript=maker-scaffold10x_137_pilon-snap-gene-0.19-mRNA-1 gene=maker-scaffold10x_137_pilon-snap-gene-0.19				204.281	75.98	0.49	166.739					Single Protein		maker-scaffold10x_137_pilon-snap-gene-0.19-mRNA-1 transcript=maker-scaffold10x_137_pilon-snap-gene-0.19-mRNA-1 gene=maker-scaffold10x_137_pilon-snap-gene-0.19	1	2	2	1	2	1	1	2	100	Doubtful
31	4	maker-scaffold10x_377_pilon-snap-gene-0.46-mRNA-1 transcript=maker-scaffold10x_377_pilon-snap-gene-0.46-mRNA-1 gene=maker-scaffold10x_377_pilon-snap-gene-0.46				24.8098	65.93	7.96	602.551					Single Protein		maker-scaffold10x_377_pilon-snap-gene-0.46-mRNA-1 transcript=maker-scaffold10x_377_pilon-snap-gene-0.46-mRNA-1 gene=maker-scaffold10x_377_pilon-snap-gene-0.46	2	4	4	2	4	2	2	13	86.6667	Doubtful
32	5	maker-scaffold10x_2706_pilon-snap-gene-0.16-mRNA-1 transcript=maker-scaffold10x_2706_pilon-snap-gene-0.16-mRNA-1 gene=maker-scaffold10x_2706_pilon-snap-gene-0.16				36.9106	92.9	4.44	1076.85					Single Protein		maker-scaffold10x_2706_pilon-snap-gene-0.16-mRNA-1 transcript=maker-scaffold10x_2706_pilon-snap-gene-0.16-mRNA-1 gene=maker-scaffold10x_2706_pilon-snap-gene-0.16	1	1	1	1	1	1	1	1	100	Doubtful
33	5	maker-scaffold10x_377_pilon-snap-gene-0.46-mRNA-1 transcript=maker-scaffold10x_377_pilon-snap-gene-0.46-mRNA-1 gene=maker-scaffold10x_377_pilon-snap-gene-0.46				24.8098	65.93	7.96	6222.57					Single Protein		maker-scaffold10x_377_pilon-snap-gene-0.46-mRNA-1 transcript=maker-scaffold10x_377_pilon-snap-gene-0.46-mRNA-1 gene=maker-scaffold10x_377_pilon-snap-gene-0.46	3	3	3	3	3	3	14	23	100	Doubtful
33	6	maker-scaffold10x_38_pilon-snap-gene-0.22-mRNA-1 transcript=maker-scaffold10x_38_pilon-snap-gene-0.22-mRNA-1 gene=maker-scaffold10x_38_pilon-snap-gene-0.22				62.1511	69.98	1.45	955.26					Single Protein		maker-scaffold10x_38_pilon-snap-gene-0.22-mRNA-1 transcript=maker-scaffold10x_38_pilon-snap-gene-0.22-mRNA-1 gene=maker-scaffold10x_38_pilon-snap-gene-0.22	1	1	1	1	1	1	4	5	92.8571	Doubtful
33	11	snap_masked-scaffold10x_416_pilon-processed-gene-0.61-mRNA-1 transcript=snap_masked-scaffold10x_416_pilon-processed-gene-0.61-mRNA-1 gene=snap_masked-scaffold10x_416_pilon-processed-gene-0.61				416.622	58.32	0.35	0	Deamidation of N(N179)	Deamidation of N(1)			Single Protein		snap_masked-scaffold10x_416_pilon-processed-gene-0.61-mRNA-1 transcript=snap_masked-scaffold10x_416_pilon-processed-gene-0.61-mRNA-1 gene=snap_masked-scaffold10x_416_pilon-processed-gene-0.61	1	1	1	1	1	1	0	4	86.6667	Doubtful
34	2	maker-scaffold10x_1194_pilon-snap-gene-0.35-mRNA-1 transcript=maker-scaffold10x_1194_pilon-snap-gene-0.35-mRNA-1 gene=maker-scaffold10x_1194_pilon-snap-gene-0.35				47.4948	62.89	3.13	825.292					Single Protein		maker-scaffold10x_1194_pilon-snap-gene-0.35-mRNA-1 transcript=maker-scaffold10x_1194_pilon-snap-gene-0.35-mRNA-1 gene=maker-scaffold10x_1194_pilon-snap-gene-0.35	1	1	1	1	1	1	1	1	12.7796	Doubtful
34	5	maker-scaffold10x_439_pilon-augustus-gene-0.21-mRNA-1 transcript=maker-scaffold10x_439_pilon-augustus-gene-0.21-mRNA-1 gene=maker-scaffold10x_439_pilon-augustus-gene-0.21				27.2487	74.07	16.87	5807.61					Single Protein		maker-scaffold10x_439_pilon-augustus-gene-0.21-mRNA-1 transcript=maker-scaffold10x_439_pilon-augustus-gene-0.21-mRNA-1 gene=maker-scaffold10x_439_pilon-augustus-gene-0.21	5	5	5	5	5	5	8	14	12.7796	Doubtful
34	7	maker-scaffold10x_445_pilon-augustus-gene-0.18-mRNA-1 transcript=maker-scaffold10x_445_pilon-augustus-gene-0.18-mRNA-1 gene=maker-scaffold10x_445_pilon-augustus-gene-0.18				37.1513	67.35	3.24	1014.92					Single Protein		maker-scaffold10x_445_pilon-augustus-gene-0.18-mRNA-1 transcript=maker-scaffold10x_445_pilon-augustus-gene-0.18-mRNA-1 gene=maker-scaffold10x_445_pilon-augustus-gene-0.18	1	1	1	1	1	1	1	1	12.7796	Doubtful
34	11	maker-scaffold10x_137_pilon-snap-gene-0.19-mRNA-1 transcript=maker-scaffold10x_137_pilon-snap-gene-0.19-mRNA-1 gene=maker-scaffold10x_137_pilon-snap-gene-0.19				204.281	77.19	0.49	188.016					Single Protein		maker-scaffold10x_137_pilon-snap-gene-0.19-mRNA-1 transcript=maker-scaffold10x_137_pilon-snap-gene-0.19-mRNA-1 gene=maker-scaffold10x_137_pilon-snap-gene-0.19	1	4	4	1	4	1	1	4	12.7796	Doubtful
35	4	maker-scaffold10x_693_pilon-augustus-gene-0.35-mRNA-1 transcript=maker-scaffold10x_693_pilon-augustus-gene-0.35-mRNA-1 gene=maker-scaffold10x_693_pilon-augustus-gene-0.35				75.1325	60.12	2.11	465.21					Single Protein		maker-scaffold10x_693_pilon-augustus-gene-0.35-mRNA-1 transcript=maker-scaffold10x_693_pilon-augustus-gene-0.35-mRNA-1 gene=maker-scaffold10x_693_pilon-augustus-gene-0.35	1	1	1	1	1	1	1	1	100	Doubtful
35	7	maker-scaffold10x_265_pilon-snap-gene-0.26-mRNA-1 transcript=maker-scaffold10x_265_pilon-snap-gene-0.26-mRNA-1 gene=maker-scaffold10x_265_pilon-snap-gene-0.26				37.8465	63.16	10.82	2412.09					Single Protein		maker-scaffold10x_265_pilon-snap-gene-0.26-mRNA-1 transcript=maker-scaffold10x_265_pilon-snap-gene-0.26-mRNA-1 gene=maker-scaffold10x_265_pilon-snap-gene-0.26	4	4	4	4	4	4	7	12	100	Doubtful
36	1	augustus_masked-scaffold10x_269_pilon-processed-gene-0.18-mRNA-1 transcript=augustus_masked-scaffold10x_269_pilon-processed-gene-0.18-mRNA-1 gene=augustus_masked-scaffold10x_269_pilon-processed-gene-0.18				41.6188	59.04	10.64	805.677					Related Proteins	augustus_masked-scaffold10x_502_pilon-processed-gene-0.29-mRNA-1 transcript=augustus_masked-scaffold10x_502_pilon-processed-gene-0.29-mRNA-1 gene=augustus_masked-scaffold10x_502_pilon-processed-gene-0.29, maker-scaffold10x_502_pilon-augustus-gene-0.20-mRNA-1 transcript=maker-scaffold10x_502_pilon-augustus-gene-0.20-mRNA-1 gene=maker-scaffold10x_502_pilon-augustus-gene-0.20, maker-scaffold10x_502_…	augustus_masked-scaffold10x_269_pilon-processed-gene-0.18-mRNA-1 transcript=augustus_masked-scaffold10x_269_pilon-processed-gene-0.18-mRNA-1 gene=augustus_masked-scaffold10x_269_pilon-processed-gene-0.18, augustus_masked-scaffold10x_502_pilon-processed-gene-0.29-mRNA-1 transcript=augustus_masked-scaffold10x_502_pilon-processed-gene-0.29-mRNA-1 gene=augustus_masked-scaffold10x_502_pilon-processed-…	4	4	0	0	0	0	4	4	15.739	Doubtful
36	2	maker-scaffold10x_922_pilon-snap-gene-0.60-mRNA-1 transcript=maker-scaffold10x_922_pilon-snap-gene-0.60-mRNA-1 gene=maker-scaffold10x_922_pilon-snap-gene-0.60				88.3819	55.11	1.39	360.255			Deamidation of Q (Q713-{N712 Q713})	Deamidation of Q (1)	Single Protein		maker-scaffold10x_922_pilon-snap-gene-0.60-mRNA-1 transcript=maker-scaffold10x_922_pilon-snap-gene-0.60-mRNA-1 gene=maker-scaffold10x_922_pilon-snap-gene-0.60	1	1	1	1	1	1	1	1	15.739	Doubtful
36	6	augustus_masked-scaffold10x_1318_pilon-processed-gene-0.40-mRNA-1 transcript=augustus_masked-scaffold10x_1318_pilon-processed-gene-0.40-mRNA-1 gene=augustus_masked-scaffold10x_1318_pilon-processed-gene-0.40				14.4319	78.36	6.72	1712.56					Related Proteins	augustus_masked-scaffold10x_377_pilon-processed-gene-0.182-mRNA-1 transcript=augustus_masked-scaffold10x_377_pilon-processed-gene-0.182-mRNA-1 gene=augustus_masked-scaffold10x_377_pilon-processed-gene-0.182, maker-scaffold10x_1697_pilon-snap-gene-0.105-mRNA-1 transcript=maker-scaffold10x_1697_pilon-snap-gene-0.105-mRNA-1 gene=maker-scaffold10x_1697_pilon-snap-gene-0.105	augustus_masked-scaffold10x_1318_pilon-processed-gene-0.40-mRNA-1 transcript=augustus_masked-scaffold10x_1318_pilon-processed-gene-0.40-mRNA-1 gene=augustus_masked-scaffold10x_1318_pilon-processed-gene-0.40, augustus_masked-scaffold10x_377_pilon-processed-gene-0.182-mRNA-1 transcript=augustus_masked-scaffold10x_377_pilon-processed-gene-0.182-mRNA-1 gene=augustus_masked-scaffold10x_377_pilon-proce…	1	1	1	1	1	1	1	1	15.739	Doubtful
36	13	augustus_masked-scaffold10x_269_pilon-processed-gene-0.18-mRNA-1 transcript=augustus_masked-scaffold10x_269_pilon-processed-gene-0.18-mRNA-1 gene=augustus_masked-scaffold10x_269_pilon-processed-gene-0.18				41.6188	59.04	12.77	601.276					Related Proteins	augustus_masked-scaffold10x_269_pilon-processed-gene-0.22-mRNA-1 transcript=augustus_masked-scaffold10x_269_pilon-processed-gene-0.22-mRNA-1 gene=augustus_masked-scaffold10x_269_pilon-processed-gene-0.22, augustus_masked-scaffold10x_502_pilon-processed-gene-0.29-mRNA-1 transcript=augustus_masked-scaffold10x_502_pilon-processed-gene-0.29-mRNA-1 gene=augustus_masked-scaffold10x_502_pilon-processed-…	augustus_masked-scaffold10x_269_pilon-processed-gene-0.18-mRNA-1 transcript=augustus_masked-scaffold10x_269_pilon-processed-gene-0.18-mRNA-1 gene=augustus_masked-scaffold10x_269_pilon-processed-gene-0.18, augustus_masked-scaffold10x_269_pilon-processed-gene-0.22-mRNA-1 transcript=augustus_masked-scaffold10x_269_pilon-processed-gene-0.22-mRNA-1 gene=augustus_masked-scaffold10x_269_pilon-processed-…	5	5	0	0	0	0	5	5	15.739	Doubtful
36	15	augustus_masked-scaffold10x_269_pilon-processed-gene-0.18-mRNA-1 transcript=augustus_masked-scaffold10x_269_pilon-processed-gene-0.18-mRNA-1 gene=augustus_masked-scaffold10x_269_pilon-processed-gene-0.18				41.6188	59.04	11.97	479.115					Related Proteins	augustus_masked-scaffold10x_269_pilon-processed-gene-0.22-mRNA-1 transcript=augustus_masked-scaffold10x_269_pilon-processed-gene-0.22-mRNA-1 gene=augustus_masked-scaffold10x_269_pilon-processed-gene-0.22, augustus_masked-scaffold10x_502_pilon-processed-gene-0.29-mRNA-1 transcript=augustus_masked-scaffold10x_502_pilon-processed-gene-0.29-mRNA-1 gene=augustus_masked-scaffold10x_502_pilon-processed-…	augustus_masked-scaffold10x_269_pilon-processed-gene-0.18-mRNA-1 transcript=augustus_masked-scaffold10x_269_pilon-processed-gene-0.18-mRNA-1 gene=augustus_masked-scaffold10x_269_pilon-processed-gene-0.18, augustus_masked-scaffold10x_269_pilon-processed-gene-0.22-mRNA-1 transcript=augustus_masked-scaffold10x_269_pilon-processed-gene-0.22-mRNA-1 gene=augustus_masked-scaffold10x_269_pilon-processed-…	4	4	0	0	0	0	4	4	15.739	Doubtful
36	17	augustus_masked-scaffold10x_2264_pilon-processed-gene-0.1-mRNA-1 transcript=augustus_masked-scaffold10x_2264_pilon-processed-gene-0.1-mRNA-1 gene=augustus_masked-scaffold10x_2264_pilon-processed-gene-0.1				13.6686	100	15.57	3448.51					Related Proteins	augustus_masked-scaffold10x_2264_pilon-processed-gene-0.2-mRNA-1 transcript=augustus_masked-scaffold10x_2264_pilon-processed-gene-0.2-mRNA-1 gene=augustus_masked-scaffold10x_2264_pilon-processed-gene-0.2, maker-scaffold10x_281_pilon-pred_gff_StringTie-gene-0.88-mRNA-1 transcript=maker-scaffold10x_281_pilon-pred_gff_StringTie-gene-0.88-mRNA-1 gene=maker-scaffold10x_281_pilon-pred_gff_StringTie-gen…	augustus_masked-scaffold10x_2264_pilon-processed-gene-0.1-mRNA-1 transcript=augustus_masked-scaffold10x_2264_pilon-processed-gene-0.1-mRNA-1 gene=augustus_masked-scaffold10x_2264_pilon-processed-gene-0.1, augustus_masked-scaffold10x_2264_pilon-processed-gene-0.2-mRNA-1 transcript=augustus_masked-scaffold10x_2264_pilon-processed-gene-0.2-mRNA-1 gene=augustus_masked-scaffold10x_2264_pilon-processed…	3	4	4	3	4	3	3	4	15.739	Doubtful
36	19	maker-scaffold10x_281_pilon-snap-gene-0.160-mRNA-1 transcript=maker-scaffold10x_281_pilon-snap-gene-0.160-mRNA-1 gene=maker-scaffold10x_281_pilon-snap-gene-0.160				26.3538	100	18.72	683.565					Single Protein		maker-scaffold10x_281_pilon-snap-gene-0.160-mRNA-1 transcript=maker-scaffold10x_281_pilon-snap-gene-0.160-mRNA-1 gene=maker-scaffold10x_281_pilon-snap-gene-0.160	2	2	2	2	2	2	2	2	15.739	Doubtful
38	4	maker-scaffold10x_439_pilon-augustus-gene-0.21-mRNA-1 transcript=maker-scaffold10x_439_pilon-augustus-gene-0.21-mRNA-1 gene=maker-scaffold10x_439_pilon-augustus-gene-0.21				27.2487	65.02	10.29	2753.1					Single Protein		maker-scaffold10x_439_pilon-augustus-gene-0.21-mRNA-1 transcript=maker-scaffold10x_439_pilon-augustus-gene-0.21-mRNA-1 gene=maker-scaffold10x_439_pilon-augustus-gene-0.21	2	3	3	2	3	2	2	3	8.69565	Doubtful
38	10	maker-scaffold10x_137_pilon-snap-gene-0.19-mRNA-1 transcript=maker-scaffold10x_137_pilon-snap-gene-0.19-mRNA-1 gene=maker-scaffold10x_137_pilon-snap-gene-0.19				204.281	75.98	0.49	198.065					Single Protein		maker-scaffold10x_137_pilon-snap-gene-0.19-mRNA-1 transcript=maker-scaffold10x_137_pilon-snap-gene-0.19-mRNA-1 gene=maker-scaffold10x_137_pilon-snap-gene-0.19	1	1	1	1	1	1	1	1	15.1515	Doubtful
39	4	maker-scaffold10x_38_pilon-snap-gene-0.22-mRNA-1 transcript=maker-scaffold10x_38_pilon-snap-gene-0.22-mRNA-1 gene=maker-scaffold10x_38_pilon-snap-gene-0.22				62.1511	69.98	1.45	1155.31					Single Protein		maker-scaffold10x_38_pilon-snap-gene-0.22-mRNA-1 transcript=maker-scaffold10x_38_pilon-snap-gene-0.22-mRNA-1 gene=maker-scaffold10x_38_pilon-snap-gene-0.22	1	1	1	1	1	1	2	3	91.6667	Doubtful
39	9	maker-scaffold10x_1006_pilon-snap-gene-0.67-mRNA-1 transcript=maker-scaffold10x_1006_pilon-snap-gene-0.67-mRNA-1 gene=maker-scaffold10x_1006_pilon-snap-gene-0.67				52.7555	89.23	2.64	614.472			Deamidation of N (N284-{N284 Q286})	Deamidation of N (1)	Single Protein		maker-scaffold10x_1006_pilon-snap-gene-0.67-mRNA-1 transcript=maker-scaffold10x_1006_pilon-snap-gene-0.67-mRNA-1 gene=maker-scaffold10x_1006_pilon-snap-gene-0.67	1	1	1	1	1	1	1	1	100	Doubtful
39	11	maker-scaffold10x_137_pilon-snap-gene-0.19-mRNA-1 transcript=maker-scaffold10x_137_pilon-snap-gene-0.19-mRNA-1 gene=maker-scaffold10x_137_pilon-snap-gene-0.19				204.281	75.98	0.49	167.617					Single Protein		maker-scaffold10x_137_pilon-snap-gene-0.19-mRNA-1 transcript=maker-scaffold10x_137_pilon-snap-gene-0.19-mRNA-1 gene=maker-scaffold10x_137_pilon-snap-gene-0.19	1	2	2	1	2	1	1	2	100	Doubtful
41	2	maker-scaffold10x_1326_pilon-snap-gene-0.58-mRNA-1 transcript=maker-scaffold10x_1326_pilon-snap-gene-0.58-mRNA-1 gene=maker-scaffold10x_1326_pilon-snap-gene-0.58				101.797	60.13	0	0					Single Protein		maker-scaffold10x_1326_pilon-snap-gene-0.58-mRNA-1 transcript=maker-scaffold10x_1326_pilon-snap-gene-0.58-mRNA-1 gene=maker-scaffold10x_1326_pilon-snap-gene-0.58	0	1	1	0	1	0	0	1	70	Doubtful
41	7	maker-scaffold10x_1420_pilon-snap-gene-0.45-mRNA-1 transcript=maker-scaffold10x_1420_pilon-snap-gene-0.45-mRNA-1 gene=maker-scaffold10x_1420_pilon-snap-gene-0.45				31.7549	100	5.49	1802.72					Single Protein		maker-scaffold10x_1420_pilon-snap-gene-0.45-mRNA-1 transcript=maker-scaffold10x_1420_pilon-snap-gene-0.45-mRNA-1 gene=maker-scaffold10x_1420_pilon-snap-gene-0.45	1	1	1	1	1	1	1	1	100	Doubtful
42	1	augustus_masked-scaffold10x_1302_pilon-processed-gene-0.32-mRNA-1 transcript=augustus_masked-scaffold10x_1302_pilon-processed-gene-0.32-mRNA-1 gene=augustus_masked-scaffold10x_1302_pilon-processed-gene-0.32				223.054	96.51	0	0					Single Protein		augustus_masked-scaffold10x_1302_pilon-processed-gene-0.32-mRNA-1 transcript=augustus_masked-scaffold10x_1302_pilon-processed-gene-0.32-mRNA-1 gene=augustus_masked-scaffold10x_1302_pilon-processed-gene-0.32	0	2	2	0	2	0	0	2	88.2353	Doubtful
42	7	snap_masked-scaffold10x_416_pilon-processed-gene-0.61-mRNA-1 transcript=snap_masked-scaffold10x_416_pilon-processed-gene-0.61-mRNA-1 gene=snap_masked-scaffold10x_416_pilon-processed-gene-0.61				416.622	75.53	0.35	173.176			Deamidation of N (N179-{N176 N179})	Deamidation of N (1)	Single Protein		snap_masked-scaffold10x_416_pilon-processed-gene-0.61-mRNA-1 transcript=snap_masked-scaffold10x_416_pilon-processed-gene-0.61-mRNA-1 gene=snap_masked-scaffold10x_416_pilon-processed-gene-0.61	1	1	1	1	1	1	1	1	100	Doubtful
42	8	maker-scaffold10x_1013_pilon-snap-gene-0.119-mRNA-1 transcript=maker-scaffold10x_1013_pilon-snap-gene-0.119-mRNA-1 gene=maker-scaffold10x_1013_pilon-snap-gene-0.119				155.681	71.09	0.57	0					Single Protein		maker-scaffold10x_1013_pilon-snap-gene-0.119-mRNA-1 transcript=maker-scaffold10x_1013_pilon-snap-gene-0.119-mRNA-1 gene=maker-scaffold10x_1013_pilon-snap-gene-0.119	1	1	1	1	1	1	0	4	88.2353	Doubtful
43	1	maker-scaffold10x_783_pilon-augustus-gene-0.27-mRNA-1 transcript=maker-scaffold10x_783_pilon-augustus-gene-0.27-mRNA-1 gene=maker-scaffold10x_783_pilon-augustus-gene-0.27				19.4168	63.74	14.04	12098.5					Single Protein		maker-scaffold10x_783_pilon-augustus-gene-0.27-mRNA-1 transcript=maker-scaffold10x_783_pilon-augustus-gene-0.27-mRNA-1 gene=maker-scaffold10x_783_pilon-augustus-gene-0.27	3	5	5	3	5	3	2	6	60.7143	Doubtful
43	8	maker-scaffold10x_265_pilon-snap-gene-0.26-mRNA-1 transcript=maker-scaffold10x_265_pilon-snap-gene-0.26-mRNA-1 gene=maker-scaffold10x_265_pilon-snap-gene-0.26				37.8465	100	0	0					Single Protein		maker-scaffold10x_265_pilon-snap-gene-0.26-mRNA-1 transcript=maker-scaffold10x_265_pilon-snap-gene-0.26-mRNA-1 gene=maker-scaffold10x_265_pilon-snap-gene-0.26	0	3	3	0	3	0	0	4	50	Doubtful
44	1	maker-scaffold10x_783_pilon-augustus-gene-0.27-mRNA-1 transcript=maker-scaffold10x_783_pilon-augustus-gene-0.27-mRNA-1 gene=maker-scaffold10x_783_pilon-augustus-gene-0.27				19.4168	63.74	21.05	10301.8					Single Protein		maker-scaffold10x_783_pilon-augustus-gene-0.27-mRNA-1 transcript=maker-scaffold10x_783_pilon-augustus-gene-0.27-mRNA-1 gene=maker-scaffold10x_783_pilon-augustus-gene-0.27	3	4	4	3	4	3	3	4	100	Doubtful
44	4	maker-scaffold10x_265_pilon-snap-gene-0.26-mRNA-1 transcript=maker-scaffold10x_265_pilon-snap-gene-0.26-mRNA-1 gene=maker-scaffold10x_265_pilon-snap-gene-0.26				37.8465	83.63	7.89	3283.34					Single Protein		maker-scaffold10x_265_pilon-snap-gene-0.26-mRNA-1 transcript=maker-scaffold10x_265_pilon-snap-gene-0.26-mRNA-1 gene=maker-scaffold10x_265_pilon-snap-gene-0.26	3	3	3	3	3	3	3	3	92.3077	Doubtful
45	3	maker-scaffold10x_265_pilon-snap-gene-0.26-mRNA-1 transcript=maker-scaffold10x_265_pilon-snap-gene-0.26-mRNA-1 gene=maker-scaffold10x_265_pilon-snap-gene-0.26				37.8465	100	2.34	0					Single Protein		maker-scaffold10x_265_pilon-snap-gene-0.26-mRNA-1 transcript=maker-scaffold10x_265_pilon-snap-gene-0.26-mRNA-1 gene=maker-scaffold10x_265_pilon-snap-gene-0.26	1	3	3	1	3	1	0	5	90.9091	Doubtful
45	6	maker-scaffold10x_38_pilon-snap-gene-0.22-mRNA-1 transcript=maker-scaffold10x_38_pilon-snap-gene-0.22-mRNA-1 gene=maker-scaffold10x_38_pilon-snap-gene-0.22				62.1511	87.52	1.45	0					Single Protein		maker-scaffold10x_38_pilon-snap-gene-0.22-mRNA-1 transcript=maker-scaffold10x_38_pilon-snap-gene-0.22-mRNA-1 gene=maker-scaffold10x_38_pilon-snap-gene-0.22	1	1	1	1	1	1	0	1	90.9091	Doubtful
46	5	maker-scaffold10x_908_pilon-augustus-gene-1.138-mRNA-1 transcript=maker-scaffold10x_908_pilon-augustus-gene-1.138-mRNA-1 gene=maker-scaffold10x_908_pilon-augustus-gene-1.138				53.4783	86.31	0	0					Single Protein		maker-scaffold10x_908_pilon-augustus-gene-1.138-mRNA-1 transcript=maker-scaffold10x_908_pilon-augustus-gene-1.138-mRNA-1 gene=maker-scaffold10x_908_pilon-augustus-gene-1.138	0	1	1	0	1	0	1	1	75	Doubtful
46	7	maker-scaffold10x_318_pilon-snap-gene-0.83-mRNA-1 transcript=maker-scaffold10x_318_pilon-snap-gene-0.83-mRNA-1 gene=maker-scaffold10x_318_pilon-snap-gene-0.83				11.6709	100	10.28	4512.05					Single Protein		maker-scaffold10x_318_pilon-snap-gene-0.83-mRNA-1 transcript=maker-scaffold10x_318_pilon-snap-gene-0.83-mRNA-1 gene=maker-scaffold10x_318_pilon-snap-gene-0.83	1	1	1	1	1	1	1	1	100	Doubtful
46	8	snap_masked-scaffold10x_416_pilon-processed-gene-0.61-mRNA-1 transcript=snap_masked-scaffold10x_416_pilon-processed-gene-0.61-mRNA-1 gene=snap_masked-scaffold10x_416_pilon-processed-gene-0.61				416.622	75.53	0.35	170.236			Deamidation of N (N179-{N176 N179})	Deamidation of N (1)	Single Protein		snap_masked-scaffold10x_416_pilon-processed-gene-0.61-mRNA-1 transcript=snap_masked-scaffold10x_416_pilon-processed-gene-0.61-mRNA-1 gene=snap_masked-scaffold10x_416_pilon-processed-gene-0.61	1	1	1	1	1	1	1	1	100	Doubtful
47	2	maker-scaffold10x_377_pilon-snap-gene-0.47-mRNA-1 transcript=maker-scaffold10x_377_pilon-snap-gene-0.47-mRNA-1 gene=maker-scaffold10x_377_pilon-snap-gene-0.47				181.517	84.49	1.29	0	Deamidation of N(N415)	Deamidation of N(1)			Single Protein		maker-scaffold10x_377_pilon-snap-gene-0.47-mRNA-1 transcript=maker-scaffold10x_377_pilon-snap-gene-0.47-mRNA-1 gene=maker-scaffold10x_377_pilon-snap-gene-0.47	1	1	1	1	1	1	0	1	66.6667	Doubtful
47	4	maker-scaffold10x_332_pilon-augustus-gene-0.12-mRNA-1 transcript=maker-scaffold10x_332_pilon-augustus-gene-0.12-mRNA-1 gene=maker-scaffold10x_332_pilon-augustus-gene-0.12				755.455	84.12	0.22	0					Single Protein		maker-scaffold10x_332_pilon-augustus-gene-0.12-mRNA-1 transcript=maker-scaffold10x_332_pilon-augustus-gene-0.12-mRNA-1 gene=maker-scaffold10x_332_pilon-augustus-gene-0.12	1	1	1	1	1	1	0	1	100	Doubtful
47	7	maker-scaffold10x_61_pilon-snap-gene-0.36-mRNA-1 transcript=maker-scaffold10x_61_pilon-snap-gene-0.36-mRNA-1 gene=maker-scaffold10x_61_pilon-snap-gene-0.36				15.8157	52.6	33.77	43938.3	Deamidation of N(N37); Oxidation of M(M9, M118)	Deamidation of N(1); Oxidation of M(2)			Single Protein		maker-scaffold10x_61_pilon-snap-gene-0.36-mRNA-1 transcript=maker-scaffold10x_61_pilon-snap-gene-0.36-mRNA-1 gene=maker-scaffold10x_61_pilon-snap-gene-0.36	7	8	8	7	8	7	24	29	100	Doubtful
48	2	maker-scaffold10x_245_pilon-snap-gene-0.128-mRNA-1 transcript=maker-scaffold10x_245_pilon-snap-gene-0.128-mRNA-1 gene=maker-scaffold10x_245_pilon-snap-gene-0.128				113.972	83.05	1.04	894.481					Single Protein		maker-scaffold10x_245_pilon-snap-gene-0.128-mRNA-1 transcript=maker-scaffold10x_245_pilon-snap-gene-0.128-mRNA-1 gene=maker-scaffold10x_245_pilon-snap-gene-0.128	1	1	1	1	1	1	1	1	60	Doubtful
48	6	maker-scaffold10x_61_pilon-snap-gene-0.36-mRNA-1 transcript=maker-scaffold10x_61_pilon-snap-gene-0.36-mRNA-1 gene=maker-scaffold10x_61_pilon-snap-gene-0.36				15.8157	52.6	10.39	9684.69					Single Protein		maker-scaffold10x_61_pilon-snap-gene-0.36-mRNA-1 transcript=maker-scaffold10x_61_pilon-snap-gene-0.36-mRNA-1 gene=maker-scaffold10x_61_pilon-snap-gene-0.36	1	1	1	1	1	1	1	1	60	Doubtful
49	1	maker-scaffold10x_1708_pilon-snap-gene-0.5-mRNA-1 transcript=maker-scaffold10x_1708_pilon-snap-gene-0.5-mRNA-1 gene=maker-scaffold10x_1708_pilon-snap-gene-0.5				170.758	83.34	0.84	686.672					Single Protein		maker-scaffold10x_1708_pilon-snap-gene-0.5-mRNA-1 transcript=maker-scaffold10x_1708_pilon-snap-gene-0.5-mRNA-1 gene=maker-scaffold10x_1708_pilon-snap-gene-0.5	1	1	1	1	1	1	1	1	100	Doubtful
49	3	maker-scaffold10x_1010_pilon-snap-gene-0.110-mRNA-1 transcript=maker-scaffold10x_1010_pilon-snap-gene-0.110-mRNA-1 gene=maker-scaffold10x_1010_pilon-snap-gene-0.110				126.687	85.04	0.77	899.826	Deamidation of N(N629)	Deamidation of N(1)			Single Protein		maker-scaffold10x_1010_pilon-snap-gene-0.110-mRNA-1 transcript=maker-scaffold10x_1010_pilon-snap-gene-0.110-mRNA-1 gene=maker-scaffold10x_1010_pilon-snap-gene-0.110	1	1	1	1	1	1	1	1	100	Doubtful
49	7	maker-scaffold10x_1549_pilon-augustus-gene-0.49-mRNA-1 transcript=maker-scaffold10x_1549_pilon-augustus-gene-0.49-mRNA-1 gene=maker-scaffold10x_1549_pilon-augustus-gene-0.49				43.3466	100	2.95	2385.86					Single Protein		maker-scaffold10x_1549_pilon-augustus-gene-0.49-mRNA-1 transcript=maker-scaffold10x_1549_pilon-augustus-gene-0.49-mRNA-1 gene=maker-scaffold10x_1549_pilon-augustus-gene-0.49	1	1	1	1	1	1	1	1	100	Doubtful
50	5	maker-scaffold10x_815_pilon-snap-gene-1.98-mRNA-1 transcript=maker-scaffold10x_815_pilon-snap-gene-1.98-mRNA-1 gene=maker-scaffold10x_815_pilon-snap-gene-1.98				71.8093	84.34	2.06	1431.63					Single Protein		maker-scaffold10x_815_pilon-snap-gene-1.98-mRNA-1 transcript=maker-scaffold10x_815_pilon-snap-gene-1.98-mRNA-1 gene=maker-scaffold10x_815_pilon-snap-gene-1.98	1	1	1	1	1	1	1	1	100	Doubtful
50	7	maker-scaffold10x_481_pilon-snap-gene-0.104-mRNA-1 transcript=maker-scaffold10x_481_pilon-snap-gene-0.104-mRNA-1 gene=maker-scaffold10x_481_pilon-snap-gene-0.104				140.363	79.26	1.11	0					Single Protein		maker-scaffold10x_481_pilon-snap-gene-0.104-mRNA-1 transcript=maker-scaffold10x_481_pilon-snap-gene-0.104-mRNA-1 gene=maker-scaffold10x_481_pilon-snap-gene-0.104	1	1	1	1	1	1	0	1	100	Doubtful
51	2	snap_masked-scaffold10x_653_pilon-processed-gene-0.12-mRNA-1 transcript=snap_masked-scaffold10x_653_pilon-processed-gene-0.12-mRNA-1 gene=snap_masked-scaffold10x_653_pilon-processed-gene-0.12				20.1594	100	4.57	0	Deamidation of N(N156)	Deamidation of N(1)			Related Proteins	maker-scaffold10x_653_pilon-augustus-gene-0.31-mRNA-1 transcript=maker-scaffold10x_653_pilon-augustus-gene-0.31-mRNA-1 gene=maker-scaffold10x_653_pilon-augustus-gene-0.31	maker-scaffold10x_653_pilon-augustus-gene-0.31-mRNA-1 transcript=maker-scaffold10x_653_pilon-augustus-gene-0.31-mRNA-1 gene=maker-scaffold10x_653_pilon-augustus-gene-0.31, snap_masked-scaffold10x_653_pilon-processed-gene-0.12-mRNA-1 transcript=snap_masked-scaffold10x_653_pilon-processed-gene-0.12-mRNA-1 gene=snap_masked-scaffold10x_653_pilon-processed-gene-0.12	1	1	1	1	1	1	0	1	100	Doubtful
51	4	maker-scaffold10x_56_pilon-augustus-gene-0.84-mRNA-1 transcript=maker-scaffold10x_56_pilon-augustus-gene-0.84-mRNA-1 gene=maker-scaffold10x_56_pilon-augustus-gene-0.84				11.8212	100	20.2	0	Oxidation of M(M39)	Oxidation of M(1)			Single Protein		maker-scaffold10x_56_pilon-augustus-gene-0.84-mRNA-1 transcript=maker-scaffold10x_56_pilon-augustus-gene-0.84-mRNA-1 gene=maker-scaffold10x_56_pilon-augustus-gene-0.84	1	1	1	1	1	1	0	1	100	Doubtful
51	7	maker-scaffold10x_815_pilon-snap-gene-1.98-mRNA-1 transcript=maker-scaffold10x_815_pilon-snap-gene-1.98-mRNA-1 gene=maker-scaffold10x_815_pilon-snap-gene-1.98				71.8093	84.34	2.06	0					Single Protein		maker-scaffold10x_815_pilon-snap-gene-1.98-mRNA-1 transcript=maker-scaffold10x_815_pilon-snap-gene-1.98-mRNA-1 gene=maker-scaffold10x_815_pilon-snap-gene-1.98	1	1	1	1	1	1	0	1	100	Doubtful
54	2	maker-scaffold10x_1010_pilon-snap-gene-0.110-mRNA-1 transcript=maker-scaffold10x_1010_pilon-snap-gene-0.110-mRNA-1 gene=maker-scaffold10x_1010_pilon-snap-gene-0.110				126.687	85.04	0.77	973.111	Deamidation of N(N629)	Deamidation of N(1)			Single Protein		maker-scaffold10x_1010_pilon-snap-gene-0.110-mRNA-1 transcript=maker-scaffold10x_1010_pilon-snap-gene-0.110-mRNA-1 gene=maker-scaffold10x_1010_pilon-snap-gene-0.110	1	1	1	1	1	1	1	1	100	Doubtful
55	5	maker-scaffold10x_815_pilon-snap-gene-1.98-mRNA-1 transcript=maker-scaffold10x_815_pilon-snap-gene-1.98-mRNA-1 gene=maker-scaffold10x_815_pilon-snap-gene-1.98				71.8093	84.34	2.06	0					Single Protein		maker-scaffold10x_815_pilon-snap-gene-1.98-mRNA-1 transcript=maker-scaffold10x_815_pilon-snap-gene-1.98-mRNA-1 gene=maker-scaffold10x_815_pilon-snap-gene-1.98	1	1	1	1	1	1	0	2	100	Doubtful
55	6	maker-scaffold10x_1072_pilon-snap-gene-0.18-mRNA-1 transcript=maker-scaffold10x_1072_pilon-snap-gene-0.18-mRNA-1 gene=maker-scaffold10x_1072_pilon-snap-gene-0.18				367.415	73.99	0.36	0	Oxidation of M(M2941)	Oxidation of M(1)			Single Protein		maker-scaffold10x_1072_pilon-snap-gene-0.18-mRNA-1 transcript=maker-scaffold10x_1072_pilon-snap-gene-0.18-mRNA-1 gene=maker-scaffold10x_1072_pilon-snap-gene-0.18	1	1	1	1	1	1	0	1	100	Doubtful
55	7	maker-scaffold10x_908_pilon-snap-gene-0.99-mRNA-1 transcript=maker-scaffold10x_908_pilon-snap-gene-0.99-mRNA-1 gene=maker-scaffold10x_908_pilon-snap-gene-0.99				44.4639	90.67	9.59	499.73					Single Protein		maker-scaffold10x_908_pilon-snap-gene-0.99-mRNA-1 transcript=maker-scaffold10x_908_pilon-snap-gene-0.99-mRNA-1 gene=maker-scaffold10x_908_pilon-snap-gene-0.99	2	3	3	2	3	2	1	5	100	Doubtful
56	1	maker-scaffold10x_293_pilon-snap-gene-0.143-mRNA-1 transcript=maker-scaffold10x_293_pilon-snap-gene-0.143-mRNA-1 gene=maker-scaffold10x_293_pilon-snap-gene-0.143				38.681	80.63	19.94	2377.19			Deamidation of N (N98-{N96 N98}, N258-{N256 N258}), Deamidation of Q (Q90-{Q86 Q90}, Q250-{Q246 Q250})	Deamidation of N (2), Deamidation of Q (2)	Single Protein		maker-scaffold10x_293_pilon-snap-gene-0.143-mRNA-1 transcript=maker-scaffold10x_293_pilon-snap-gene-0.143-mRNA-1 gene=maker-scaffold10x_293_pilon-snap-gene-0.143	2	4	4	2	4	2	3	4	13.3333	Doubtful
56	3	maker-scaffold10x_1040_pilon-snap-gene-0.45-mRNA-1 transcript=maker-scaffold10x_1040_pilon-snap-gene-0.45-mRNA-1 gene=maker-scaffold10x_1040_pilon-snap-gene-0.45				292.898	71.98	0.41	0					Single Protein		maker-scaffold10x_1040_pilon-snap-gene-0.45-mRNA-1 transcript=maker-scaffold10x_1040_pilon-snap-gene-0.45-mRNA-1 gene=maker-scaffold10x_1040_pilon-snap-gene-0.45	1	1	1	1	1	1	0	1	13.3333	Doubtful
56	4	snap_masked-scaffold10x_416_pilon-processed-gene-0.61-mRNA-1 transcript=snap_masked-scaffold10x_416_pilon-processed-gene-0.61-mRNA-1 gene=snap_masked-scaffold10x_416_pilon-processed-gene-0.61				416.622	75.53	0.35	0			Deamidation of N (N179-{N176 N179})	Deamidation of N (1)	Single Protein		snap_masked-scaffold10x_416_pilon-processed-gene-0.61-mRNA-1 transcript=snap_masked-scaffold10x_416_pilon-processed-gene-0.61-mRNA-1 gene=snap_masked-scaffold10x_416_pilon-processed-gene-0.61	1	1	1	1	1	1	0	1	13.3333	Doubtful
57	1	maker-scaffold10x_445_pilon-augustus-gene-0.18-mRNA-1 transcript=maker-scaffold10x_445_pilon-augustus-gene-0.18-mRNA-1 gene=maker-scaffold10x_445_pilon-augustus-gene-0.18				37.1513	90.88	0	0					Single Protein		maker-scaffold10x_445_pilon-augustus-gene-0.18-mRNA-1 transcript=maker-scaffold10x_445_pilon-augustus-gene-0.18-mRNA-1 gene=maker-scaffold10x_445_pilon-augustus-gene-0.18	0	1	1	0	1	0	0	1	74.0741	Doubtful
57	2	maker-scaffold10x_819_pilon-augustus-gene-0.18-mRNA-1 transcript=maker-scaffold10x_819_pilon-augustus-gene-0.18-mRNA-1 gene=maker-scaffold10x_819_pilon-augustus-gene-0.18				28.8853	85.71	6.35	2937.76					Single Protein		maker-scaffold10x_819_pilon-augustus-gene-0.18-mRNA-1 transcript=maker-scaffold10x_819_pilon-augustus-gene-0.18-mRNA-1 gene=maker-scaffold10x_819_pilon-augustus-gene-0.18	1	1	1	1	1	1	1	1	90	Doubtful
57	5	maker-scaffold10x_265_pilon-snap-gene-0.26-mRNA-1 transcript=maker-scaffold10x_265_pilon-snap-gene-0.26-mRNA-1 gene=maker-scaffold10x_265_pilon-snap-gene-0.26				37.8465	100	2.34	0					Single Protein		maker-scaffold10x_265_pilon-snap-gene-0.26-mRNA-1 transcript=maker-scaffold10x_265_pilon-snap-gene-0.26-mRNA-1 gene=maker-scaffold10x_265_pilon-snap-gene-0.26	1	2	2	1	2	1	0	2	74.0741	Doubtful
57	8	maker-scaffold10x_660_pilon-snap-gene-0.5-mRNA-1 transcript=maker-scaffold10x_660_pilon-snap-gene-0.5-mRNA-1 gene=maker-scaffold10x_660_pilon-snap-gene-0.5				130.183	70.52	0	0					Single Protein		maker-scaffold10x_660_pilon-snap-gene-0.5-mRNA-1 transcript=maker-scaffold10x_660_pilon-snap-gene-0.5-mRNA-1 gene=maker-scaffold10x_660_pilon-snap-gene-0.5	0	2	2	0	2	0	0	2	74.0741	Doubtful
57	9	maker-scaffold10x_263_pilon-snap-gene-0.31-mRNA-1 transcript=maker-scaffold10x_263_pilon-snap-gene-0.31-mRNA-1 gene=maker-scaffold10x_263_pilon-snap-gene-0.31				501.84	85.98	0.3	0			Deamidation of N (N2005-{N1998 N2005})	Deamidation of N (1)	Single Protein		maker-scaffold10x_263_pilon-snap-gene-0.31-mRNA-1 transcript=maker-scaffold10x_263_pilon-snap-gene-0.31-mRNA-1 gene=maker-scaffold10x_263_pilon-snap-gene-0.31	1	1	1	1	1	1	0	1	90	Doubtful
57	10	maker-scaffold10x_1194_pilon-snap-gene-0.35-mRNA-1 transcript=maker-scaffold10x_1194_pilon-snap-gene-0.35-mRNA-1 gene=maker-scaffold10x_1194_pilon-snap-gene-0.35				47.4948	91.57	3.86	10019.3					Related Proteins	maker-scaffold10x_1194_pilon-snap-gene-0.52-mRNA-1 transcript=maker-scaffold10x_1194_pilon-snap-gene-0.52-mRNA-1 gene=maker-scaffold10x_1194_pilon-snap-gene-0.52	maker-scaffold10x_1194_pilon-snap-gene-0.35-mRNA-1 transcript=maker-scaffold10x_1194_pilon-snap-gene-0.35-mRNA-1 gene=maker-scaffold10x_1194_pilon-snap-gene-0.35, maker-scaffold10x_1194_pilon-snap-gene-0.52-mRNA-1 transcript=maker-scaffold10x_1194_pilon-snap-gene-0.52-mRNA-1 gene=maker-scaffold10x_1194_pilon-snap-gene-0.52	1	1	0	0	0	0	6	7	90	Doubtful
57	11	maker-scaffold10x_1194_pilon-snap-gene-0.52-mRNA-1 transcript=maker-scaffold10x_1194_pilon-snap-gene-0.52-mRNA-1 gene=maker-scaffold10x_1194_pilon-snap-gene-0.52				27.8961	72.22	5.95	3486.57					Related Proteins	maker-scaffold10x_685_pilon-snap-gene-0.26-mRNA-1 transcript=maker-scaffold10x_685_pilon-snap-gene-0.26-mRNA-1 gene=maker-scaffold10x_685_pilon-snap-gene-0.26	maker-scaffold10x_1194_pilon-snap-gene-0.52-mRNA-1 transcript=maker-scaffold10x_1194_pilon-snap-gene-0.52-mRNA-1 gene=maker-scaffold10x_1194_pilon-snap-gene-0.52, maker-scaffold10x_685_pilon-snap-gene-0.26-mRNA-1 transcript=maker-scaffold10x_685_pilon-snap-gene-0.26-mRNA-1 gene=maker-scaffold10x_685_pilon-snap-gene-0.26	1	1	0	0	0	0	1	1	90	Doubtful
57	12	maker-scaffold10x_561_pilon-snap-gene-0.17-mRNA-1 transcript=maker-scaffold10x_561_pilon-snap-gene-0.17-mRNA-1 gene=maker-scaffold10x_561_pilon-snap-gene-0.17				14.3444	100	14.06	0	Oxidation of M(M50)	Oxidation of M(1)			Single Protein		maker-scaffold10x_561_pilon-snap-gene-0.17-mRNA-1 transcript=maker-scaffold10x_561_pilon-snap-gene-0.17-mRNA-1 gene=maker-scaffold10x_561_pilon-snap-gene-0.17	1	1	1	1	1	1	0	1	90	Doubtful
10	3	maker-scaffold10x_303_pilon-snap-gene-0.30-mRNA-1 transcript=maker-scaffold10x_303_pilon-snap-gene-0.30-mRNA-1 gene=maker-scaffold10x_303_pilon-snap-gene-0.30				48.8558	64.4	22.68	2164.52					Single Protein		maker-scaffold10x_303_pilon-snap-gene-0.30-mRNA-1 transcript=maker-scaffold10x_303_pilon-snap-gene-0.30-mRNA-1 gene=maker-scaffold10x_303_pilon-snap-gene-0.30	8	10	10	8	10	8	9	12	100	Doubtful
10	6	maker-scaffold10x_205_pilon-snap-gene-0.60-mRNA-1 transcript=maker-scaffold10x_205_pilon-snap-gene-0.60-mRNA-1 gene=maker-scaffold10x_205_pilon-snap-gene-0.60				44.7333	50.38	10.03	2255.23					Single Protein		maker-scaffold10x_205_pilon-snap-gene-0.60-mRNA-1 transcript=maker-scaffold10x_205_pilon-snap-gene-0.60-mRNA-1 gene=maker-scaffold10x_205_pilon-snap-gene-0.60	4	4	4	4	4	4	4	4	100	Doubtful

## Sheet: Fh=>2 peptides
Spot	Proteína	Main Accession	Description	Gene Name	Chromosome	MW [kDa]	Possible Coverage [%]	Coverage [%]	Spectrum Counting	Confidently Localized Modification Sites	# Confidently Localized Modification Sites	Ambiguously Localized Modification Sites	#Ambiguously Localized Modification Sites	Protein Inference	Secondary Accessions	Protein Group	#Validated Peptides	#Peptides	#Unique	#Validated Unique	#Unique to Group	#Validated Unique to Group	#Validated PSMs	#PSMs	Confidence [%]	Validation
1	2	maker-scaffold10x_324_pilon-snap-gene-0.68-mRNA-1 transcript=maker-scaffold10x_324_pilon-snap-gene-0.68-mRNA-1 gene=maker-scaffold10x_324_pilon-snap-gene-0.68				123.061	69.55	0.78	7952.68					Single Protein		maker-scaffold10x_324_pilon-snap-gene-0.68-mRNA-1 transcript=maker-scaffold10x_324_pilon-snap-gene-0.68-mRNA-1 gene=maker-scaffold10x_324_pilon-snap-gene-0.68	1	1	1	1	1	1	2	2	100	Doubtful
1	3	maker-scaffold10x_598_pilon-snap-gene-1.86-mRNA-1 transcript=maker-scaffold10x_598_pilon-snap-gene-1.86-mRNA-1 gene=maker-scaffold10x_598_pilon-snap-gene-1.86				54.3544	90.98	0	0					Single Protein		maker-scaffold10x_598_pilon-snap-gene-1.86-mRNA-1 transcript=maker-scaffold10x_598_pilon-snap-gene-1.86-mRNA-1 gene=maker-scaffold10x_598_pilon-snap-gene-1.86	0	1	1	0	1	0	0	1	100	Doubtful
2	1	maker-scaffold10x_370_pilon-augustus-gene-0.31-mRNA-1 transcript=maker-scaffold10x_370_pilon-augustus-gene-0.31-mRNA-1 gene=maker-scaffold10x_370_pilon-augustus-gene-0.31				223.349	73.06	0.39	NaN					Single Protein		maker-scaffold10x_370_pilon-augustus-gene-0.31-mRNA-1 transcript=maker-scaffold10x_370_pilon-augustus-gene-0.31-mRNA-1 gene=maker-scaffold10x_370_pilon-augustus-gene-0.31	1	2	2	1	2	1	0	2	100	Doubtful
2	2	maker-scaffold10x_1706_pilon-snap-gene-0.6-mRNA-1 transcript=maker-scaffold10x_1706_pilon-snap-gene-0.6-mRNA-1 gene=maker-scaffold10x_1706_pilon-snap-gene-0.6				56.2049	75.44	2.16	NaN	Oxidation of M(M46)	Oxidation of M(1)			Single Protein		maker-scaffold10x_1706_pilon-snap-gene-0.6-mRNA-1 transcript=maker-scaffold10x_1706_pilon-snap-gene-0.6-mRNA-1 gene=maker-scaffold10x_1706_pilon-snap-gene-0.6	1	2	2	1	2	1	0	2	100	Doubtful
3	1	maker-scaffold10x_262_pilon-snap-gene-0.0-mRNA-1 transcript=maker-scaffold10x_262_pilon-snap-gene-0.0-mRNA-1 gene=maker-scaffold10x_262_pilon-snap-gene-0.0				95.0005	78.74	1.17	2783.9					Single Protein		maker-scaffold10x_262_pilon-snap-gene-0.0-mRNA-1 transcript=maker-scaffold10x_262_pilon-snap-gene-0.0-mRNA-1 gene=maker-scaffold10x_262_pilon-snap-gene-0.0	1	1	1	1	1	1	1	1	100	Doubtful
3	2	maker-scaffold10x_297_pilon-augustus-gene-0.99-mRNA-1 transcript=maker-scaffold10x_297_pilon-augustus-gene-0.99-mRNA-1 gene=maker-scaffold10x_297_pilon-augustus-gene-0.99				272.865	81.51	0.55	1803.31					Single Protein		maker-scaffold10x_297_pilon-augustus-gene-0.99-mRNA-1 transcript=maker-scaffold10x_297_pilon-augustus-gene-0.99-mRNA-1 gene=maker-scaffold10x_297_pilon-augustus-gene-0.99	1	2	2	1	2	1	2	4	100	Doubtful
3	3	maker-scaffold10x_598_pilon-snap-gene-1.86-mRNA-1 transcript=maker-scaffold10x_598_pilon-snap-gene-1.86-mRNA-1 gene=maker-scaffold10x_598_pilon-snap-gene-1.86				54.3544	90.98	2.05	4226.01	Deamidation of Q(Q36)	Deamidation of Q(1)			Single Protein		maker-scaffold10x_598_pilon-snap-gene-1.86-mRNA-1 transcript=maker-scaffold10x_598_pilon-snap-gene-1.86-mRNA-1 gene=maker-scaffold10x_598_pilon-snap-gene-1.86	1	1	1	1	1	1	1	1	100	Doubtful
3	5	maker-scaffold10x_309_pilon-snap-gene-0.1-mRNA-1 transcript=maker-scaffold10x_309_pilon-snap-gene-0.1-mRNA-1 gene=maker-scaffold10x_309_pilon-snap-gene-0.1				111.328	75.71	1.18	2427.36					Single Protein		maker-scaffold10x_309_pilon-snap-gene-0.1-mRNA-1 transcript=maker-scaffold10x_309_pilon-snap-gene-0.1-mRNA-1 gene=maker-scaffold10x_309_pilon-snap-gene-0.1	1	1	1	1	1	1	1	1	100	Doubtful
3	6	maker-scaffold10x_205_pilon-snap-gene-0.60-mRNA-1 transcript=maker-scaffold10x_205_pilon-snap-gene-0.60-mRNA-1 gene=maker-scaffold10x_205_pilon-snap-gene-0.60				44.7333	72.43	2.26	6492.55					Single Protein		maker-scaffold10x_205_pilon-snap-gene-0.60-mRNA-1 transcript=maker-scaffold10x_205_pilon-snap-gene-0.60-mRNA-1 gene=maker-scaffold10x_205_pilon-snap-gene-0.60	1	1	1	1	1	1	1	1	100	Doubtful
3	7	maker-scaffold10x_1600_pilon-snap-gene-0.3-mRNA-1 transcript=maker-scaffold10x_1600_pilon-snap-gene-0.3-mRNA-1 gene=maker-scaffold10x_1600_pilon-snap-gene-0.3				28.9939	87.22	4.51	8087.71					Single Protein		maker-scaffold10x_1600_pilon-snap-gene-0.3-mRNA-1 transcript=maker-scaffold10x_1600_pilon-snap-gene-0.3-mRNA-1 gene=maker-scaffold10x_1600_pilon-snap-gene-0.3	1	1	1	1	1	1	1	1	100	Doubtful
4	1	maker-scaffold10x_345_pilon-snap-gene-1.111-mRNA-1 transcript=maker-scaffold10x_345_pilon-snap-gene-1.111-mRNA-1 gene=maker-scaffold10x_345_pilon-snap-gene-1.111				148.06	64.61	1.63	NaN	Deamidation of N(N861)	Deamidation of N(1)			Single Protein		maker-scaffold10x_345_pilon-snap-gene-1.111-mRNA-1 transcript=maker-scaffold10x_345_pilon-snap-gene-1.111-mRNA-1 gene=maker-scaffold10x_345_pilon-snap-gene-1.111	1	2	2	1	2	1	0	2	100	Doubtful
4	2	maker-scaffold10x_1115_pilon-snap-gene-0.5-mRNA-1 transcript=maker-scaffold10x_1115_pilon-snap-gene-0.5-mRNA-1 gene=maker-scaffold10x_1115_pilon-snap-gene-0.5				40.2964	74.18	3.02	NaN					Single Protein		maker-scaffold10x_1115_pilon-snap-gene-0.5-mRNA-1 transcript=maker-scaffold10x_1115_pilon-snap-gene-0.5-mRNA-1 gene=maker-scaffold10x_1115_pilon-snap-gene-0.5	1	1	1	1	1	1	0	1	100	Doubtful
4	3	maker-scaffold10x_598_pilon-snap-gene-1.86-mRNA-1 transcript=maker-scaffold10x_598_pilon-snap-gene-1.86-mRNA-1 gene=maker-scaffold10x_598_pilon-snap-gene-1.86				54.3544	90.98	2.05	NaN	Deamidation of Q(Q36)	Deamidation of Q(1)			Single Protein		maker-scaffold10x_598_pilon-snap-gene-1.86-mRNA-1 transcript=maker-scaffold10x_598_pilon-snap-gene-1.86-mRNA-1 gene=maker-scaffold10x_598_pilon-snap-gene-1.86	1	1	1	1	1	1	0	1	100	Doubtful
4	5	maker-scaffold10x_1272_pilon-snap-gene-0.11-mRNA-1 transcript=maker-scaffold10x_1272_pilon-snap-gene-0.11-mRNA-1 gene=maker-scaffold10x_1272_pilon-snap-gene-0.11				183.626	83.89	0.71	NaN					Single Protein		maker-scaffold10x_1272_pilon-snap-gene-0.11-mRNA-1 transcript=maker-scaffold10x_1272_pilon-snap-gene-0.11-mRNA-1 gene=maker-scaffold10x_1272_pilon-snap-gene-0.11	1	1	1	1	1	1	0	1	100	Doubtful
5	1	maker-scaffold10x_1445_pilon-snap-gene-0.72-mRNA-1 transcript=maker-scaffold10x_1445_pilon-snap-gene-0.72-mRNA-1 gene=maker-scaffold10x_1445_pilon-snap-gene-0.72				117.77	91.08	1.22	2636.89			Deamidation of N (N247-{N247 Q255})	Deamidation of N (1)	Single Protein		maker-scaffold10x_1445_pilon-snap-gene-0.72-mRNA-1 transcript=maker-scaffold10x_1445_pilon-snap-gene-0.72-mRNA-1 gene=maker-scaffold10x_1445_pilon-snap-gene-0.72	1	2	2	1	2	1	1	4	11.3953	Doubtful
5	2	maker-scaffold10x_749_pilon-snap-gene-0.139-mRNA-1 transcript=maker-scaffold10x_749_pilon-snap-gene-0.139-mRNA-1 gene=maker-scaffold10x_749_pilon-snap-gene-0.139				23.9044	80.57	6.16	15045.8					Single Protein		maker-scaffold10x_749_pilon-snap-gene-0.139-mRNA-1 transcript=maker-scaffold10x_749_pilon-snap-gene-0.139-mRNA-1 gene=maker-scaffold10x_749_pilon-snap-gene-0.139	1	1	1	1	1	1	1	1	11.3953	Doubtful
5	3	maker-scaffold10x_297_pilon-augustus-gene-0.99-mRNA-1 transcript=maker-scaffold10x_297_pilon-augustus-gene-0.99-mRNA-1 gene=maker-scaffold10x_297_pilon-augustus-gene-0.99				272.865	81.51	0.55	1229.11					Single Protein		maker-scaffold10x_297_pilon-augustus-gene-0.99-mRNA-1 transcript=maker-scaffold10x_297_pilon-augustus-gene-0.99-mRNA-1 gene=maker-scaffold10x_297_pilon-augustus-gene-0.99	1	2	2	1	2	1	1	3	11.3953	Doubtful
5	4	maker-scaffold10x_598_pilon-snap-gene-1.86-mRNA-1 transcript=maker-scaffold10x_598_pilon-snap-gene-1.86-mRNA-1 gene=maker-scaffold10x_598_pilon-snap-gene-1.86				54.3544	90.98	2.05	5760.78	Deamidation of Q(Q36)	Deamidation of Q(1)			Single Protein		maker-scaffold10x_598_pilon-snap-gene-1.86-mRNA-1 transcript=maker-scaffold10x_598_pilon-snap-gene-1.86-mRNA-1 gene=maker-scaffold10x_598_pilon-snap-gene-1.86	1	1	1	1	1	1	1	1	11.3953	Doubtful
5	5	maker-scaffold10x_113_pilon-snap-gene-0.192-mRNA-1 transcript=maker-scaffold10x_113_pilon-snap-gene-0.192-mRNA-1 gene=maker-scaffold10x_113_pilon-snap-gene-0.192				156.924	81.64	0.85	2220.3					Single Protein		maker-scaffold10x_113_pilon-snap-gene-0.192-mRNA-1 transcript=maker-scaffold10x_113_pilon-snap-gene-0.192-mRNA-1 gene=maker-scaffold10x_113_pilon-snap-gene-0.192	1	1	1	1	1	1	1	1	11.3953	Doubtful
5	6	maker-scaffold10x_1272_pilon-snap-gene-0.11-mRNA-1 transcript=maker-scaffold10x_1272_pilon-snap-gene-0.11-mRNA-1 gene=maker-scaffold10x_1272_pilon-snap-gene-0.11				183.626	83.89	0.71	1812.75					Single Protein		maker-scaffold10x_1272_pilon-snap-gene-0.11-mRNA-1 transcript=maker-scaffold10x_1272_pilon-snap-gene-0.11-mRNA-1 gene=maker-scaffold10x_1272_pilon-snap-gene-0.11	1	1	1	1	1	1	1	1	11.3953	Doubtful
5	7	maker-scaffold10x_815_pilon-snap-gene-1.82-mRNA-1 transcript=maker-scaffold10x_815_pilon-snap-gene-1.82-mRNA-1 gene=maker-scaffold10x_815_pilon-snap-gene-1.82				1151.7	80.4	0	0					Single Protein		maker-scaffold10x_815_pilon-snap-gene-1.82-mRNA-1 transcript=maker-scaffold10x_815_pilon-snap-gene-1.82-mRNA-1 gene=maker-scaffold10x_815_pilon-snap-gene-1.82	0	4	4	0	4	0	0	4	11.3953	Doubtful
5	8	maker-scaffold10x_591_pilon-snap-gene-0.8-mRNA-1 transcript=maker-scaffold10x_591_pilon-snap-gene-0.8-mRNA-1 gene=maker-scaffold10x_591_pilon-snap-gene-0.8				46.5505	64.85	2.38	0					Single Protein		maker-scaffold10x_591_pilon-snap-gene-0.8-mRNA-1 transcript=maker-scaffold10x_591_pilon-snap-gene-0.8-mRNA-1 gene=maker-scaffold10x_591_pilon-snap-gene-0.8	1	1	1	1	1	1	0	1	11.3953	Doubtful
6	1	maker-scaffold10x_1272_pilon-snap-gene-0.11-mRNA-1 transcript=maker-scaffold10x_1272_pilon-snap-gene-0.11-mRNA-1 gene=maker-scaffold10x_1272_pilon-snap-gene-0.11				183.626	83.89	0	NaN					Single Protein		maker-scaffold10x_1272_pilon-snap-gene-0.11-mRNA-1 transcript=maker-scaffold10x_1272_pilon-snap-gene-0.11-mRNA-1 gene=maker-scaffold10x_1272_pilon-snap-gene-0.11	0	2	2	0	2	0	0	2	4.61957	Doubtful
6	2	maker-scaffold10x_19_pilon-augustus-gene-0.63-mRNA-1 transcript=maker-scaffold10x_19_pilon-augustus-gene-0.63-mRNA-1 gene=maker-scaffold10x_19_pilon-augustus-gene-0.63				190.64	62.51	0	NaN					Single Protein		maker-scaffold10x_19_pilon-augustus-gene-0.63-mRNA-1 transcript=maker-scaffold10x_19_pilon-augustus-gene-0.63-mRNA-1 gene=maker-scaffold10x_19_pilon-augustus-gene-0.63	0	1	1	0	1	0	0	1	4.61957	Doubtful
8	1	maker-scaffold10x_1272_pilon-snap-gene-0.11-mRNA-1 transcript=maker-scaffold10x_1272_pilon-snap-gene-0.11-mRNA-1 gene=maker-scaffold10x_1272_pilon-snap-gene-0.11				183.626	83.89	0	0					Single Protein		maker-scaffold10x_1272_pilon-snap-gene-0.11-mRNA-1 transcript=maker-scaffold10x_1272_pilon-snap-gene-0.11-mRNA-1 gene=maker-scaffold10x_1272_pilon-snap-gene-0.11	0	1	1	0	1	0	1	1	10.8401	Doubtful
11	2	maker-scaffold10x_387_pilon-snap-gene-0.68-mRNA-1 transcript=maker-scaffold10x_387_pilon-snap-gene-0.68-mRNA-1 gene=maker-scaffold10x_387_pilon-snap-gene-0.68				56.9172	83.59	1.54	807.942					Single Protein		maker-scaffold10x_387_pilon-snap-gene-0.68-mRNA-1 transcript=maker-scaffold10x_387_pilon-snap-gene-0.68-mRNA-1 gene=maker-scaffold10x_387_pilon-snap-gene-0.68	1	1	1	1	1	1	1	2	100	Doubtful
11	4	augustus_masked-scaffold10x_269_pilon-processed-gene-0.18-mRNA-1 transcript=augustus_masked-scaffold10x_269_pilon-processed-gene-0.18-mRNA-1 gene=augustus_masked-scaffold10x_269_pilon-processed-gene-0.18				41.6188	76.86	2.66	1046.46					Related Proteins	augustus_masked-scaffold10x_269_pilon-processed-gene-0.22-mRNA-1 transcript=augustus_masked-scaffold10x_269_pilon-processed-gene-0.22-mRNA-1 gene=augustus_masked-scaffold10x_269_pilon-processed-gene-0.22, augustus_masked-scaffold10x_502_pilon-processed-gene-0.29-mRNA-1 transcript=augustus_masked-scaffold10x_502_pilon-processed-gene-0.29-mRNA-1 gene=augustus_masked-scaffold10x_502_pilon-processed-…	augustus_masked-scaffold10x_269_pilon-processed-gene-0.18-mRNA-1 transcript=augustus_masked-scaffold10x_269_pilon-processed-gene-0.18-mRNA-1 gene=augustus_masked-scaffold10x_269_pilon-processed-gene-0.18, augustus_masked-scaffold10x_269_pilon-processed-gene-0.22-mRNA-1 transcript=augustus_masked-scaffold10x_269_pilon-processed-gene-0.22-mRNA-1 gene=augustus_masked-scaffold10x_269_pilon-processed-…	1	1	0	0	0	0	1	1	100	Doubtful
11	6	maker-scaffold10x_1061_pilon-snap-gene-0.101-mRNA-1 transcript=maker-scaffold10x_1061_pilon-snap-gene-0.101-mRNA-1 gene=maker-scaffold10x_1061_pilon-snap-gene-0.101				68.7774	87.71	2.99	653.601			Deamidation of N (N127-{N118 Q120 N127 N130})	Deamidation of N (1)	Single Protein		maker-scaffold10x_1061_pilon-snap-gene-0.101-mRNA-1 transcript=maker-scaffold10x_1061_pilon-snap-gene-0.101-mRNA-1 gene=maker-scaffold10x_1061_pilon-snap-gene-0.101	1	1	1	1	1	1	1	1	100	Doubtful
11	8	maker-scaffold10x_466_pilon-snap-gene-0.92-mRNA-1 transcript=maker-scaffold10x_466_pilon-snap-gene-0.92-mRNA-1 gene=maker-scaffold10x_466_pilon-snap-gene-0.92				48.1419	63.02	2.09	1099.07	Oxidation of M(M261)	Oxidation of M(1)			Single Protein		maker-scaffold10x_466_pilon-snap-gene-0.92-mRNA-1 transcript=maker-scaffold10x_466_pilon-snap-gene-0.92-mRNA-1 gene=maker-scaffold10x_466_pilon-snap-gene-0.92	1	1	1	1	1	1	1	2	100	Doubtful
11	9	augustus_masked-scaffold10x_269_pilon-processed-gene-0.18-mRNA-1 transcript=augustus_masked-scaffold10x_269_pilon-processed-gene-0.18-mRNA-1 gene=augustus_masked-scaffold10x_269_pilon-processed-gene-0.18				41.6188	76.86	4.26	0					Related Proteins	augustus_masked-scaffold10x_269_pilon-processed-gene-0.22-mRNA-1 transcript=augustus_masked-scaffold10x_269_pilon-processed-gene-0.22-mRNA-1 gene=augustus_masked-scaffold10x_269_pilon-processed-gene-0.22, augustus_masked-scaffold10x_502_pilon-processed-gene-0.29-mRNA-1 transcript=augustus_masked-scaffold10x_502_pilon-processed-gene-0.29-mRNA-1 gene=augustus_masked-scaffold10x_502_pilon-processed-…	augustus_masked-scaffold10x_269_pilon-processed-gene-0.18-mRNA-1 transcript=augustus_masked-scaffold10x_269_pilon-processed-gene-0.18-mRNA-1 gene=augustus_masked-scaffold10x_269_pilon-processed-gene-0.18, augustus_masked-scaffold10x_269_pilon-processed-gene-0.22-mRNA-1 transcript=augustus_masked-scaffold10x_269_pilon-processed-gene-0.22-mRNA-1 gene=augustus_masked-scaffold10x_269_pilon-processed-…	1	1	0	0	0	0	0	1	95	Doubtful
11	10	maker-scaffold10x_245_pilon-snap-gene-0.128-mRNA-1 transcript=maker-scaffold10x_245_pilon-snap-gene-0.128-mRNA-1 gene=maker-scaffold10x_245_pilon-snap-gene-0.128				113.972	62.78	1.04	448.652					Single Protein		maker-scaffold10x_245_pilon-snap-gene-0.128-mRNA-1 transcript=maker-scaffold10x_245_pilon-snap-gene-0.128-mRNA-1 gene=maker-scaffold10x_245_pilon-snap-gene-0.128	1	1	1	1	1	1	1	3	100	Doubtful
11	11	maker-scaffold10x_894_pilon-augustus-gene-0.86-mRNA-1 transcript=maker-scaffold10x_894_pilon-augustus-gene-0.86-mRNA-1 gene=maker-scaffold10x_894_pilon-augustus-gene-0.86				78.4245	69.59	1.46	826.613					Single Protein		maker-scaffold10x_894_pilon-augustus-gene-0.86-mRNA-1 transcript=maker-scaffold10x_894_pilon-augustus-gene-0.86-mRNA-1 gene=maker-scaffold10x_894_pilon-augustus-gene-0.86	1	1	1	1	1	1	1	1	100	Doubtful
11	14	maker-scaffold10x_445_pilon-snap-gene-0.20-mRNA-1 transcript=maker-scaffold10x_445_pilon-snap-gene-0.20-mRNA-1 gene=maker-scaffold10x_445_pilon-snap-gene-0.20				175.666	86.69	0.62	485.463					Single Protein		maker-scaffold10x_445_pilon-snap-gene-0.20-mRNA-1 transcript=maker-scaffold10x_445_pilon-snap-gene-0.20-mRNA-1 gene=maker-scaffold10x_445_pilon-snap-gene-0.20	1	1	1	1	1	1	2	2	100	Doubtful
11	18	maker-scaffold10x_137_pilon-snap-gene-0.19-mRNA-1 transcript=maker-scaffold10x_137_pilon-snap-gene-0.19-mRNA-1 gene=maker-scaffold10x_137_pilon-snap-gene-0.19				204.281	77.19	0.49	235.892					Single Protein		maker-scaffold10x_137_pilon-snap-gene-0.19-mRNA-1 transcript=maker-scaffold10x_137_pilon-snap-gene-0.19-mRNA-1 gene=maker-scaffold10x_137_pilon-snap-gene-0.19	1	2	2	1	2	1	1	2	100	Doubtful
11	19	maker-scaffold10x_330_pilon-snap-gene-0.93-mRNA-1 transcript=maker-scaffold10x_330_pilon-snap-gene-0.93-mRNA-1 gene=maker-scaffold10x_330_pilon-snap-gene-0.93				74.8455	62.62	1.26	746.618					Single Protein		maker-scaffold10x_330_pilon-snap-gene-0.93-mRNA-1 transcript=maker-scaffold10x_330_pilon-snap-gene-0.93-mRNA-1 gene=maker-scaffold10x_330_pilon-snap-gene-0.93	1	1	1	1	1	1	1	1	100	Doubtful
14	2	maker-scaffold10x_45_pilon-snap-gene-0.54-mRNA-1 transcript=maker-scaffold10x_45_pilon-snap-gene-0.54-mRNA-1 gene=maker-scaffold10x_45_pilon-snap-gene-0.54				38.0224	84.84	10.5	3803.57	Deamidation of N(N300)	Deamidation of N(1)			Single Protein		maker-scaffold10x_45_pilon-snap-gene-0.54-mRNA-1 transcript=maker-scaffold10x_45_pilon-snap-gene-0.54-mRNA-1 gene=maker-scaffold10x_45_pilon-snap-gene-0.54	3	7	7	3	7	3	7	8	100	Doubtful
14	5	maker-scaffold10x_114_pilon-snap-gene-0.90-mRNA-1 transcript=maker-scaffold10x_114_pilon-snap-gene-0.90-mRNA-1 gene=maker-scaffold10x_114_pilon-snap-gene-0.90				29.8868	100	4.85	2252.72					Single Protein		maker-scaffold10x_114_pilon-snap-gene-0.90-mRNA-1 transcript=maker-scaffold10x_114_pilon-snap-gene-0.90-mRNA-1 gene=maker-scaffold10x_114_pilon-snap-gene-0.90	1	5	5	1	5	1	1	5	100	Doubtful
14	6	maker-scaffold10x_1382_pilon-snap-gene-0.57-mRNA-1 transcript=maker-scaffold10x_1382_pilon-snap-gene-0.57-mRNA-1 gene=maker-scaffold10x_1382_pilon-snap-gene-0.57				35.725	100	3.48	1910.54					Single Protein		maker-scaffold10x_1382_pilon-snap-gene-0.57-mRNA-1 transcript=maker-scaffold10x_1382_pilon-snap-gene-0.57-mRNA-1 gene=maker-scaffold10x_1382_pilon-snap-gene-0.57	1	2	2	1	2	1	1	2	100	Doubtful
14	10	maker-scaffold10x_80_pilon-augustus-gene-0.131-mRNA-1 transcript=maker-scaffold10x_80_pilon-augustus-gene-0.131-mRNA-1 gene=maker-scaffold10x_80_pilon-augustus-gene-0.131				23.343	84.91	0	0					Single Protein		maker-scaffold10x_80_pilon-augustus-gene-0.131-mRNA-1 transcript=maker-scaffold10x_80_pilon-augustus-gene-0.131-mRNA-1 gene=maker-scaffold10x_80_pilon-augustus-gene-0.131	0	1	1	0	1	0	0	1	82.3529	Doubtful
15	2	maker-scaffold10x_1189_pilon-snap-gene-0.113-mRNA-1 transcript=maker-scaffold10x_1189_pilon-snap-gene-0.113-mRNA-1 gene=maker-scaffold10x_1189_pilon-snap-gene-0.113				67.8437	92.7	1.66	691.622					Single Protein		maker-scaffold10x_1189_pilon-snap-gene-0.113-mRNA-1 transcript=maker-scaffold10x_1189_pilon-snap-gene-0.113-mRNA-1 gene=maker-scaffold10x_1189_pilon-snap-gene-0.113	1	2	2	1	2	1	1	2	9.21502	Doubtful
15	5	maker-scaffold10x_113_pilon-augustus-gene-0.45-mRNA-1 transcript=maker-scaffold10x_113_pilon-augustus-gene-0.45-mRNA-1 gene=maker-scaffold10x_113_pilon-augustus-gene-0.45				27.1849	86.53	7.76	911.832					Single Protein		maker-scaffold10x_113_pilon-augustus-gene-0.45-mRNA-1 transcript=maker-scaffold10x_113_pilon-augustus-gene-0.45-mRNA-1 gene=maker-scaffold10x_113_pilon-augustus-gene-0.45	2	5	5	2	5	2	1	8	9.21502	Doubtful
15	6	maker-scaffold10x_794_pilon-snap-gene-0.129-mRNA-1 transcript=maker-scaffold10x_794_pilon-snap-gene-0.129-mRNA-1 gene=maker-scaffold10x_794_pilon-snap-gene-0.129				31.4931	100	10.49	4055.42					Single Protein		maker-scaffold10x_794_pilon-snap-gene-0.129-mRNA-1 transcript=maker-scaffold10x_794_pilon-snap-gene-0.129-mRNA-1 gene=maker-scaffold10x_794_pilon-snap-gene-0.129	2	2	2	2	2	2	5	5	9.21502	Doubtful
15	7	maker-scaffold10x_65_pilon-snap-gene-0.12-mRNA-1 transcript=maker-scaffold10x_65_pilon-snap-gene-0.12-mRNA-1 gene=maker-scaffold10x_65_pilon-snap-gene-0.12				27.4146	83	6.48	1885.94					Single Protein		maker-scaffold10x_65_pilon-snap-gene-0.12-mRNA-1 transcript=maker-scaffold10x_65_pilon-snap-gene-0.12-mRNA-1 gene=maker-scaffold10x_65_pilon-snap-gene-0.12	1	1	1	1	1	1	1	1	9.21502	Doubtful
15	11	maker-scaffold10x_137_pilon-snap-gene-0.19-mRNA-1 transcript=maker-scaffold10x_137_pilon-snap-gene-0.19-mRNA-1 gene=maker-scaffold10x_137_pilon-snap-gene-0.19				204.281	91.7	0.49	231.785					Single Protein		maker-scaffold10x_137_pilon-snap-gene-0.19-mRNA-1 transcript=maker-scaffold10x_137_pilon-snap-gene-0.19-mRNA-1 gene=maker-scaffold10x_137_pilon-snap-gene-0.19	1	1	1	1	1	1	1	1	9.21502	Doubtful
16	1	maker-scaffold10x_82_pilon-snap-gene-0.81-mRNA-1 transcript=maker-scaffold10x_82_pilon-snap-gene-0.81-mRNA-1 gene=maker-scaffold10x_82_pilon-snap-gene-0.81				35.9154	100	3.24	667.502	Deamidation of N(N103)	Deamidation of N(1)	Deamidation of Q (Q111-{N106 Q111})	Deamidation of Q (1)	Single Protein		maker-scaffold10x_82_pilon-snap-gene-0.81-mRNA-1 transcript=maker-scaffold10x_82_pilon-snap-gene-0.81-mRNA-1 gene=maker-scaffold10x_82_pilon-snap-gene-0.81	1	2	2	1	2	1	1	2	100	Doubtful
16	3	maker-scaffold10x_250_pilon-snap-gene-0.13-mRNA-1 transcript=maker-scaffold10x_250_pilon-snap-gene-0.13-mRNA-1 gene=maker-scaffold10x_250_pilon-snap-gene-0.13				28.4545	76.59	3.57	950.498					Related Proteins	maker-scaffold10x_2740_pilon-augustus-gene-0.0-mRNA-1 transcript=maker-scaffold10x_2740_pilon-augustus-gene-0.0-mRNA-1 gene=maker-scaffold10x_2740_pilon-augustus-gene-0.0, maker-scaffold10x_2740_pilon-augustus-gene-0.1-mRNA-1 transcript=maker-scaffold10x_2740_pilon-augustus-gene-0.1-mRNA-1 gene=maker-scaffold10x_2740_pilon-augustus-gene-0.1	maker-scaffold10x_250_pilon-snap-gene-0.13-mRNA-1 transcript=maker-scaffold10x_250_pilon-snap-gene-0.13-mRNA-1 gene=maker-scaffold10x_250_pilon-snap-gene-0.13, maker-scaffold10x_2740_pilon-augustus-gene-0.0-mRNA-1 transcript=maker-scaffold10x_2740_pilon-augustus-gene-0.0-mRNA-1 gene=maker-scaffold10x_2740_pilon-augustus-gene-0.0, maker-scaffold10x_2740_pilon-augustus-gene-0.1-mRNA-1 transcript=ma…	1	1	1	1	1	1	1	1	100	Doubtful
16	4	maker-scaffold10x_693_pilon-augustus-gene-0.35-mRNA-1 transcript=maker-scaffold10x_693_pilon-augustus-gene-0.35-mRNA-1 gene=maker-scaffold10x_693_pilon-augustus-gene-0.35				75.1325	66.62	4.23	596.122					Single Protein		maker-scaffold10x_693_pilon-augustus-gene-0.35-mRNA-1 transcript=maker-scaffold10x_693_pilon-augustus-gene-0.35-mRNA-1 gene=maker-scaffold10x_693_pilon-augustus-gene-0.35	2	2	2	2	2	2	2	2	100	Doubtful
16	5	maker-scaffold10x_819_pilon-augustus-gene-0.18-mRNA-1 transcript=maker-scaffold10x_819_pilon-augustus-gene-0.18-mRNA-1 gene=maker-scaffold10x_819_pilon-augustus-gene-0.18				28.8853	85.71	34.13	10484	Oxidation of M(M236, M247)	Oxidation of M(2)	Deamidation of Q (Q186-{Q179 Q184 Q186})	Deamidation of Q (1)	Single Protein		maker-scaffold10x_819_pilon-augustus-gene-0.18-mRNA-1 transcript=maker-scaffold10x_819_pilon-augustus-gene-0.18-mRNA-1 gene=maker-scaffold10x_819_pilon-augustus-gene-0.18	18	24	23	17	23	17	40	45	100	Doubtful
16	6	maker-scaffold10x_383_pilon-snap-gene-1.15-mRNA-1 transcript=maker-scaffold10x_383_pilon-snap-gene-1.15-mRNA-1 gene=maker-scaffold10x_383_pilon-snap-gene-1.15				18.3516	62.5	0	0					Single Protein		maker-scaffold10x_383_pilon-snap-gene-1.15-mRNA-1 transcript=maker-scaffold10x_383_pilon-snap-gene-1.15-mRNA-1 gene=maker-scaffold10x_383_pilon-snap-gene-1.15	0	1	1	0	1	0	1	1	71.4286	Doubtful
16	9	maker-scaffold10x_137_pilon-snap-gene-0.19-mRNA-1 transcript=maker-scaffold10x_137_pilon-snap-gene-0.19-mRNA-1 gene=maker-scaffold10x_137_pilon-snap-gene-0.19				204.281	77.19	0	0					Single Protein		maker-scaffold10x_137_pilon-snap-gene-0.19-mRNA-1 transcript=maker-scaffold10x_137_pilon-snap-gene-0.19-mRNA-1 gene=maker-scaffold10x_137_pilon-snap-gene-0.19	0	2	2	0	2	0	1	2	71.4286	Doubtful
16	11	maker-scaffold10x_1194_pilon-snap-gene-0.52-mRNA-1 transcript=maker-scaffold10x_1194_pilon-snap-gene-0.52-mRNA-1 gene=maker-scaffold10x_1194_pilon-snap-gene-0.52				27.8961	72.22	55.95	6135.62	Deamidation of N(N215); Deamidation of Q(Q112); Oxidation of M(M236, M247)	Deamidation of N(1); Deamidation of Q(1); Oxidation of M(2)	Oxidation of M (M67-{M67 M72})	Oxidation of M (1)	Single Protein		maker-scaffold10x_1194_pilon-snap-gene-0.52-mRNA-1 transcript=maker-scaffold10x_1194_pilon-snap-gene-0.52-mRNA-1 gene=maker-scaffold10x_1194_pilon-snap-gene-0.52	20	29	6	4	6	4	58	61	100	Doubtful
16	12	maker-scaffold10x_685_pilon-snap-gene-0.26-mRNA-1 transcript=maker-scaffold10x_685_pilon-snap-gene-0.26-mRNA-1 gene=maker-scaffold10x_685_pilon-snap-gene-0.26				36.9567	63.8	14.72	1639.49			Oxidation of M (M141-{M141 M146})	Oxidation of M (1)	Single Protein		maker-scaffold10x_685_pilon-snap-gene-0.26-mRNA-1 transcript=maker-scaffold10x_685_pilon-snap-gene-0.26-mRNA-1 gene=maker-scaffold10x_685_pilon-snap-gene-0.26	6	11	2	0	2	0	22	24	71.4286	Doubtful
16	13	maker-scaffold10x_1194_pilon-snap-gene-0.35-mRNA-1 transcript=maker-scaffold10x_1194_pilon-snap-gene-0.35-mRNA-1 gene=maker-scaffold10x_1194_pilon-snap-gene-0.35				47.4948	79.52	32.05	4131	Deamidation of N(N289, N326); Deamidation of Q(Q186)	Deamidation of N(2); Deamidation of Q(1)	Deamidation of Q (Q260-{Q258 Q260}), Oxidation of M (M141-{M141 M146})	Deamidation of Q (1), Oxidation of M (1)	Single Protein		maker-scaffold10x_1194_pilon-snap-gene-0.35-mRNA-1 transcript=maker-scaffold10x_1194_pilon-snap-gene-0.35-mRNA-1 gene=maker-scaffold10x_1194_pilon-snap-gene-0.35	19	26	2	2	2	2	55	56	100	Doubtful
16	14	maker-scaffold10x_1213_pilon-augustus-gene-0.9-mRNA-1 transcript=maker-scaffold10x_1213_pilon-augustus-gene-0.9-mRNA-1 gene=maker-scaffold10x_1213_pilon-augustus-gene-0.9				67.1521	53.5	1.67	488.763					Single Protein		maker-scaffold10x_1213_pilon-augustus-gene-0.9-mRNA-1 transcript=maker-scaffold10x_1213_pilon-augustus-gene-0.9-mRNA-1 gene=maker-scaffold10x_1213_pilon-augustus-gene-0.9	1	1	1	1	1	1	1	1	100	Doubtful
16	15	maker-scaffold10x_439_pilon-augustus-gene-0.21-mRNA-1 transcript=maker-scaffold10x_439_pilon-augustus-gene-0.21-mRNA-1 gene=maker-scaffold10x_439_pilon-augustus-gene-0.21				27.2487	74.07	5.76	1145.88					Single Protein		maker-scaffold10x_439_pilon-augustus-gene-0.21-mRNA-1 transcript=maker-scaffold10x_439_pilon-augustus-gene-0.21-mRNA-1 gene=maker-scaffold10x_439_pilon-augustus-gene-0.21	1	2	2	1	2	1	2	2	100	Doubtful
16	18	maker-scaffold10x_147_pilon-snap-gene-0.16-mRNA-1 transcript=maker-scaffold10x_147_pilon-snap-gene-0.16-mRNA-1 gene=maker-scaffold10x_147_pilon-snap-gene-0.16				45.3912	92.73	13.78	3489.33					Single Protein		maker-scaffold10x_147_pilon-snap-gene-0.16-mRNA-1 transcript=maker-scaffold10x_147_pilon-snap-gene-0.16-mRNA-1 gene=maker-scaffold10x_147_pilon-snap-gene-0.16	5	6	3	3	4	3	20	20	100	Doubtful
19	1	maker-scaffold10x_819_pilon-augustus-gene-0.18-mRNA-1 transcript=maker-scaffold10x_819_pilon-augustus-gene-0.18-mRNA-1 gene=maker-scaffold10x_819_pilon-augustus-gene-0.18				28.8853	85.71	6.75	1425.37					Single Protein		maker-scaffold10x_819_pilon-augustus-gene-0.18-mRNA-1 transcript=maker-scaffold10x_819_pilon-augustus-gene-0.18-mRNA-1 gene=maker-scaffold10x_819_pilon-augustus-gene-0.18	1	1	1	1	1	1	1	1	100	Doubtful
19	3	maker-scaffold10x_145_pilon-snap-gene-2.172-mRNA-1 transcript=maker-scaffold10x_145_pilon-snap-gene-2.172-mRNA-1 gene=maker-scaffold10x_145_pilon-snap-gene-2.172				156.08	66.55	0.7	0					Single Protein		maker-scaffold10x_145_pilon-snap-gene-2.172-mRNA-1 transcript=maker-scaffold10x_145_pilon-snap-gene-2.172-mRNA-1 gene=maker-scaffold10x_145_pilon-snap-gene-2.172	1	1	1	1	1	1	0	2	100	Doubtful
19	4	maker-scaffold10x_1194_pilon-snap-gene-0.52-mRNA-1 transcript=maker-scaffold10x_1194_pilon-snap-gene-0.52-mRNA-1 gene=maker-scaffold10x_1194_pilon-snap-gene-0.52				27.8961	72.22	56.75	14849.1	Deamidation of N(N133, N215); Deamidation of Q(Q135); Oxidation of M(M72, M236, M247)	Deamidation of N(2); Deamidation of Q(1); Oxidation of M(3)			Single Protein		maker-scaffold10x_1194_pilon-snap-gene-0.52-mRNA-1 transcript=maker-scaffold10x_1194_pilon-snap-gene-0.52-mRNA-1 gene=maker-scaffold10x_1194_pilon-snap-gene-0.52	24	28	8	8	8	8	46	58	100	Doubtful
19	5	maker-scaffold10x_685_pilon-snap-gene-0.26-mRNA-1 transcript=maker-scaffold10x_685_pilon-snap-gene-0.26-mRNA-1 gene=maker-scaffold10x_685_pilon-snap-gene-0.26				36.9567	79.75	33.13	4432.17	Oxidation of M(M146)	Oxidation of M(1)			Single Protein		maker-scaffold10x_685_pilon-snap-gene-0.26-mRNA-1 transcript=maker-scaffold10x_685_pilon-snap-gene-0.26-mRNA-1 gene=maker-scaffold10x_685_pilon-snap-gene-0.26	11	13	5	4	5	4	19	22	100	Doubtful
19	6	maker-scaffold10x_1194_pilon-snap-gene-0.35-mRNA-1 transcript=maker-scaffold10x_1194_pilon-snap-gene-0.35-mRNA-1 gene=maker-scaffold10x_1194_pilon-snap-gene-0.35				47.4948	91.57	33.73	7527.96	Deamidation of N(N289, N326); Deamidation of Q(Q258); Oxidation of M(M146)	Deamidation of N(2); Deamidation of Q(1); Oxidation of M(1)			Single Protein		maker-scaffold10x_1194_pilon-snap-gene-0.35-mRNA-1 transcript=maker-scaffold10x_1194_pilon-snap-gene-0.35-mRNA-1 gene=maker-scaffold10x_1194_pilon-snap-gene-0.35	19	24	2	2	2	2	42	52	100	Doubtful
19	7	maker-scaffold10x_1092_pilon-snap-gene-0.4-mRNA-1 transcript=maker-scaffold10x_1092_pilon-snap-gene-0.4-mRNA-1 gene=maker-scaffold10x_1092_pilon-snap-gene-0.4				494.2	91.55	0.32	77.6495	Deamidation of N(N1234); Deamidation of Q(Q1231); Oxidation of M(M1233)	Deamidation of N(1); Deamidation of Q(1); Oxidation of M(1)			Single Protein		maker-scaffold10x_1092_pilon-snap-gene-0.4-mRNA-1 transcript=maker-scaffold10x_1092_pilon-snap-gene-0.4-mRNA-1 gene=maker-scaffold10x_1092_pilon-snap-gene-0.4	1	1	1	1	1	1	1	1	100	Doubtful
19	9	maker-scaffold10x_281_pilon-snap-gene-0.169-mRNA-1 transcript=maker-scaffold10x_281_pilon-snap-gene-0.169-mRNA-1 gene=maker-scaffold10x_281_pilon-snap-gene-0.169				63.6612	93.37	1.79	0	Deamidation of N(N409); Oxidation of M(M405)	Deamidation of N(1); Oxidation of M(1)			Single Protein		maker-scaffold10x_281_pilon-snap-gene-0.169-mRNA-1 transcript=maker-scaffold10x_281_pilon-snap-gene-0.169-mRNA-1 gene=maker-scaffold10x_281_pilon-snap-gene-0.169	1	1	1	1	1	1	0	1	100	Doubtful
19	10	maker-scaffold10x_1010_pilon-snap-gene-0.110-mRNA-1 transcript=maker-scaffold10x_1010_pilon-snap-gene-0.110-mRNA-1 gene=maker-scaffold10x_1010_pilon-snap-gene-0.110				126.687	85.04	0.77	311.305	Deamidation of N(N629)	Deamidation of N(1)			Single Protein		maker-scaffold10x_1010_pilon-snap-gene-0.110-mRNA-1 transcript=maker-scaffold10x_1010_pilon-snap-gene-0.110-mRNA-1 gene=maker-scaffold10x_1010_pilon-snap-gene-0.110	1	1	1	1	1	1	1	1	100	Doubtful
19	11	maker-scaffold10x_147_pilon-snap-gene-0.16-mRNA-1 transcript=maker-scaffold10x_147_pilon-snap-gene-0.16-mRNA-1 gene=maker-scaffold10x_147_pilon-snap-gene-0.16				45.3912	100	18.8	2404.91					Single Protein		maker-scaffold10x_147_pilon-snap-gene-0.16-mRNA-1 transcript=maker-scaffold10x_147_pilon-snap-gene-0.16-mRNA-1 gene=maker-scaffold10x_147_pilon-snap-gene-0.16	4	6	4	3	4	3	14	18	100	Doubtful
19	14	maker-scaffold10x_2740_pilon-augustus-gene-0.0-mRNA-1 transcript=maker-scaffold10x_2740_pilon-augustus-gene-0.0-mRNA-1 gene=maker-scaffold10x_2740_pilon-augustus-gene-0.0				42.1067	81.74	4.9	205.254					Related Proteins	maker-scaffold10x_250_pilon-snap-gene-0.13-mRNA-1 transcript=maker-scaffold10x_250_pilon-snap-gene-0.13-mRNA-1 gene=maker-scaffold10x_250_pilon-snap-gene-0.13, maker-scaffold10x_2740_pilon-augustus-gene-0.1-mRNA-1 transcript=maker-scaffold10x_2740_pilon-augustus-gene-0.1-mRNA-1 gene=maker-scaffold10x_2740_pilon-augustus-gene-0.1	maker-scaffold10x_250_pilon-snap-gene-0.13-mRNA-1 transcript=maker-scaffold10x_250_pilon-snap-gene-0.13-mRNA-1 gene=maker-scaffold10x_250_pilon-snap-gene-0.13, maker-scaffold10x_2740_pilon-augustus-gene-0.0-mRNA-1 transcript=maker-scaffold10x_2740_pilon-augustus-gene-0.0-mRNA-1 gene=maker-scaffold10x_2740_pilon-augustus-gene-0.0, maker-scaffold10x_2740_pilon-augustus-gene-0.1-mRNA-1 transcript=ma…	1	1	0	0	1	1	1	1	100	Doubtful
20	2	maker-scaffold10x_2740_pilon-augustus-gene-0.1-mRNA-1 transcript=maker-scaffold10x_2740_pilon-augustus-gene-0.1-mRNA-1 gene=maker-scaffold10x_2740_pilon-augustus-gene-0.1				23.0584	100	8	6720.3					Single Protein		maker-scaffold10x_2740_pilon-augustus-gene-0.1-mRNA-1 transcript=maker-scaffold10x_2740_pilon-augustus-gene-0.1-mRNA-1 gene=maker-scaffold10x_2740_pilon-augustus-gene-0.1	1	1	1	1	1	1	3	5	19.4444	Doubtful
20	3	maker-scaffold10x_1194_pilon-snap-gene-0.52-mRNA-1 transcript=maker-scaffold10x_1194_pilon-snap-gene-0.52-mRNA-1 gene=maker-scaffold10x_1194_pilon-snap-gene-0.52				27.8961	72.22	38.1	8508.36	Deamidation of N(N215, N235); Oxidation of M(M236, M247)	Deamidation of N(2); Oxidation of M(2)			Single Protein		maker-scaffold10x_1194_pilon-snap-gene-0.52-mRNA-1 transcript=maker-scaffold10x_1194_pilon-snap-gene-0.52-mRNA-1 gene=maker-scaffold10x_1194_pilon-snap-gene-0.52	12	15	5	4	5	4	24	30	19.4444	Doubtful
20	4	maker-scaffold10x_685_pilon-snap-gene-0.26-mRNA-1 transcript=maker-scaffold10x_685_pilon-snap-gene-0.26-mRNA-1 gene=maker-scaffold10x_685_pilon-snap-gene-0.26				36.9567	79.75	13.5	4381.73					Single Protein		maker-scaffold10x_685_pilon-snap-gene-0.26-mRNA-1 transcript=maker-scaffold10x_685_pilon-snap-gene-0.26-mRNA-1 gene=maker-scaffold10x_685_pilon-snap-gene-0.26	3	6	4	1	4	1	5	10	19.4444	Doubtful
20	5	maker-scaffold10x_1194_pilon-snap-gene-0.35-mRNA-1 transcript=maker-scaffold10x_1194_pilon-snap-gene-0.35-mRNA-1 gene=maker-scaffold10x_1194_pilon-snap-gene-0.35				47.4948	91.57	26.51	9415.06	Deamidation of N(N326)	Deamidation of N(1)			Single Protein		maker-scaffold10x_1194_pilon-snap-gene-0.35-mRNA-1 transcript=maker-scaffold10x_1194_pilon-snap-gene-0.35-mRNA-1 gene=maker-scaffold10x_1194_pilon-snap-gene-0.35	10	13	4	3	4	3	27	36	19.4444	Doubtful
20	6	augustus_masked-scaffold10x_436_pilon-processed-gene-0.81-mRNA-1 transcript=augustus_masked-scaffold10x_436_pilon-processed-gene-0.81-mRNA-1 gene=augustus_masked-scaffold10x_436_pilon-processed-gene-0.81				74.9392	89.94	1.37	0			Deamidation of Q (Q17-{Q17 Q20 Q23})	Deamidation of Q (1)	Single Protein		augustus_masked-scaffold10x_436_pilon-processed-gene-0.81-mRNA-1 transcript=augustus_masked-scaffold10x_436_pilon-processed-gene-0.81-mRNA-1 gene=augustus_masked-scaffold10x_436_pilon-processed-gene-0.81	1	1	1	1	1	1	0	1	19.4444	Doubtful
23	4	maker-scaffold10x_819_pilon-augustus-gene-0.18-mRNA-1 transcript=maker-scaffold10x_819_pilon-augustus-gene-0.18-mRNA-1 gene=maker-scaffold10x_819_pilon-augustus-gene-0.18				28.8853	76.59	16.27	2226.72	Deamidation of N(N235); Oxidation of M(M236, M247)	Deamidation of N(1); Oxidation of M(2)			Single Protein		maker-scaffold10x_819_pilon-augustus-gene-0.18-mRNA-1 transcript=maker-scaffold10x_819_pilon-augustus-gene-0.18-mRNA-1 gene=maker-scaffold10x_819_pilon-augustus-gene-0.18	7	7	5	5	5	5	7	7	100	Doubtful
23	5	maker-scaffold10x_2740_pilon-augustus-gene-0.1-mRNA-1 transcript=maker-scaffold10x_2740_pilon-augustus-gene-0.1-mRNA-1 gene=maker-scaffold10x_2740_pilon-augustus-gene-0.1				23.0584	65	12.5	3668.4					Single Protein		maker-scaffold10x_2740_pilon-augustus-gene-0.1-mRNA-1 transcript=maker-scaffold10x_2740_pilon-augustus-gene-0.1-mRNA-1 gene=maker-scaffold10x_2740_pilon-augustus-gene-0.1	6	7	5	4	5	4	12	15	100	Doubtful
23	9	maker-scaffold10x_137_pilon-snap-gene-0.19-mRNA-1 transcript=maker-scaffold10x_137_pilon-snap-gene-0.19-mRNA-1 gene=maker-scaffold10x_137_pilon-snap-gene-0.19				204.281	77.19	0.49	116.702					Single Protein		maker-scaffold10x_137_pilon-snap-gene-0.19-mRNA-1 transcript=maker-scaffold10x_137_pilon-snap-gene-0.19-mRNA-1 gene=maker-scaffold10x_137_pilon-snap-gene-0.19	1	1	1	1	1	1	1	1	100	Doubtful
23	11	augustus_masked-scaffold10x_1084_pilon-processed-gene-0.111-mRNA-1 transcript=augustus_masked-scaffold10x_1084_pilon-processed-gene-0.111-mRNA-1 gene=augustus_masked-scaffold10x_1084_pilon-processed-gene-0.111				37.1208	77.68	3.27	289.671			Deamidation of N (N206-{N206 N207})	Deamidation of N (1)	Related Proteins	augustus_masked-scaffold10x_267_pilon-processed-gene-0.68-mRNA-1 transcript=augustus_masked-scaffold10x_267_pilon-processed-gene-0.68-mRNA-1 gene=augustus_masked-scaffold10x_267_pilon-processed-gene-0.68, maker-scaffold10x_1542_pilon-snap-gene-0.12-mRNA-1 transcript=maker-scaffold10x_1542_pilon-snap-gene-0.12-mRNA-1 gene=maker-scaffold10x_1542_pilon-snap-gene-0.12, maker-scaffold10x_53_pilon-snap…	augustus_masked-scaffold10x_1084_pilon-processed-gene-0.111-mRNA-1 transcript=augustus_masked-scaffold10x_1084_pilon-processed-gene-0.111-mRNA-1 gene=augustus_masked-scaffold10x_1084_pilon-processed-gene-0.111, augustus_masked-scaffold10x_267_pilon-processed-gene-0.68-mRNA-1 transcript=augustus_masked-scaffold10x_267_pilon-processed-gene-0.68-mRNA-1 gene=augustus_masked-scaffold10x_267_pilon-proc…	1	1	0	0	1	1	1	1	100	Doubtful
23	13	maker-scaffold10x_2285_pilon-snap-gene-0.13-mRNA-1 transcript=maker-scaffold10x_2285_pilon-snap-gene-0.13-mRNA-1 gene=maker-scaffold10x_2285_pilon-snap-gene-0.13				23.777	88.67	5.91	958.912					Related Proteins	maker-scaffold10x_490_pilon-snap-gene-0.8-mRNA-1 transcript=maker-scaffold10x_490_pilon-snap-gene-0.8-mRNA-1 gene=maker-scaffold10x_490_pilon-snap-gene-0.8	maker-scaffold10x_2285_pilon-snap-gene-0.13-mRNA-1 transcript=maker-scaffold10x_2285_pilon-snap-gene-0.13-mRNA-1 gene=maker-scaffold10x_2285_pilon-snap-gene-0.13, maker-scaffold10x_490_pilon-snap-gene-0.8-mRNA-1 transcript=maker-scaffold10x_490_pilon-snap-gene-0.8-mRNA-1 gene=maker-scaffold10x_490_pilon-snap-gene-0.8	1	1	1	1	1	1	1	1	100	Doubtful
23	14	maker-scaffold10x_1194_pilon-snap-gene-0.52-mRNA-1 transcript=maker-scaffold10x_1194_pilon-snap-gene-0.52-mRNA-1 gene=maker-scaffold10x_1194_pilon-snap-gene-0.52				27.8961	53.97	46.43	3496.37	Deamidation of N(N235); Deamidation of Q(Q70); Oxidation of M(M67, M72, M236, M247)	Deamidation of N(1); Deamidation of Q(1); Oxidation of M(4)	Deamidation of Q (Q108-{N105 Q108})	Deamidation of Q (1)	Single Protein		maker-scaffold10x_1194_pilon-snap-gene-0.52-mRNA-1 transcript=maker-scaffold10x_1194_pilon-snap-gene-0.52-mRNA-1 gene=maker-scaffold10x_1194_pilon-snap-gene-0.52	19	19	5	5	5	5	26	26	100	Doubtful
23	15	maker-scaffold10x_685_pilon-snap-gene-0.26-mRNA-1 transcript=maker-scaffold10x_685_pilon-snap-gene-0.26-mRNA-1 gene=maker-scaffold10x_685_pilon-snap-gene-0.26				36.9567	49.69	19.33	1966.34	Deamidation of Q(Q144); Oxidation of M(M141, M146, M177)	Deamidation of Q(1); Oxidation of M(3)			Single Protein		maker-scaffold10x_685_pilon-snap-gene-0.26-mRNA-1 transcript=maker-scaffold10x_685_pilon-snap-gene-0.26-mRNA-1 gene=maker-scaffold10x_685_pilon-snap-gene-0.26	12	12	3	3	3	3	13	13	100	Doubtful
23	16	maker-scaffold10x_1194_pilon-snap-gene-0.35-mRNA-1 transcript=maker-scaffold10x_1194_pilon-snap-gene-0.35-mRNA-1 gene=maker-scaffold10x_1194_pilon-snap-gene-0.35				47.4948	62.89	24.58	1251.04	Deamidation of N(N289); Deamidation of Q(Q144); Oxidation of M(M141, M146)	Deamidation of N(1); Deamidation of Q(1); Oxidation of M(2)			Single Protein		maker-scaffold10x_1194_pilon-snap-gene-0.35-mRNA-1 transcript=maker-scaffold10x_1194_pilon-snap-gene-0.35-mRNA-1 gene=maker-scaffold10x_1194_pilon-snap-gene-0.35	16	16	1	1	1	1	24	24	100	Doubtful
23	19	maker-scaffold10x_439_pilon-augustus-gene-0.21-mRNA-1 transcript=maker-scaffold10x_439_pilon-augustus-gene-0.21-mRNA-1 gene=maker-scaffold10x_439_pilon-augustus-gene-0.21				27.2487	74.07	16.05	2685.58			Deamidation of N (N189-{Q185 N189})	Deamidation of N (1)	Single Protein		maker-scaffold10x_439_pilon-augustus-gene-0.21-mRNA-1 transcript=maker-scaffold10x_439_pilon-augustus-gene-0.21-mRNA-1 gene=maker-scaffold10x_439_pilon-augustus-gene-0.21	5	7	7	5	7	5	6	9	100	Doubtful
23	23	maker-scaffold10x_147_pilon-snap-gene-0.16-mRNA-1 transcript=maker-scaffold10x_147_pilon-snap-gene-0.16-mRNA-1 gene=maker-scaffold10x_147_pilon-snap-gene-0.16				45.3912	63.91	9.27	971.3					Single Protein		maker-scaffold10x_147_pilon-snap-gene-0.16-mRNA-1 transcript=maker-scaffold10x_147_pilon-snap-gene-0.16-mRNA-1 gene=maker-scaffold10x_147_pilon-snap-gene-0.16	5	5	3	3	3	3	5	5	100	Doubtful
23	24	maker-scaffold10x_2740_pilon-augustus-gene-0.0-mRNA-1 transcript=maker-scaffold10x_2740_pilon-augustus-gene-0.0-mRNA-1 gene=maker-scaffold10x_2740_pilon-augustus-gene-0.0				42.1067	62.67	17.17	1546.75	Deamidation of N(N330)	Deamidation of N(1)			Single Protein		maker-scaffold10x_2740_pilon-augustus-gene-0.0-mRNA-1 transcript=maker-scaffold10x_2740_pilon-augustus-gene-0.0-mRNA-1 gene=maker-scaffold10x_2740_pilon-augustus-gene-0.0	10	10	2	2	2	2	15	16	100	Doubtful
24	4	maker-scaffold10x_1573_pilon-snap-gene-0.39-mRNA-1 transcript=maker-scaffold10x_1573_pilon-snap-gene-0.39-mRNA-1 gene=maker-scaffold10x_1573_pilon-snap-gene-0.39				35.3648	100	2.95	942.15					Single Protein		maker-scaffold10x_1573_pilon-snap-gene-0.39-mRNA-1 transcript=maker-scaffold10x_1573_pilon-snap-gene-0.39-mRNA-1 gene=maker-scaffold10x_1573_pilon-snap-gene-0.39	1	1	1	1	1	1	1	2	100	Doubtful
24	5	maker-scaffold10x_819_pilon-augustus-gene-0.18-mRNA-1 transcript=maker-scaffold10x_819_pilon-augustus-gene-0.18-mRNA-1 gene=maker-scaffold10x_819_pilon-augustus-gene-0.18				28.8853	67.86	6.35	1330.35					Single Protein		maker-scaffold10x_819_pilon-augustus-gene-0.18-mRNA-1 transcript=maker-scaffold10x_819_pilon-augustus-gene-0.18-mRNA-1 gene=maker-scaffold10x_819_pilon-augustus-gene-0.18	1	2	2	1	2	1	1	2	100	Doubtful
24	6	maker-scaffold10x_2740_pilon-augustus-gene-0.1-mRNA-1 transcript=maker-scaffold10x_2740_pilon-augustus-gene-0.1-mRNA-1 gene=maker-scaffold10x_2740_pilon-augustus-gene-0.1				23.0584	65	12.5	3591.95					Single Protein		maker-scaffold10x_2740_pilon-augustus-gene-0.1-mRNA-1 transcript=maker-scaffold10x_2740_pilon-augustus-gene-0.1-mRNA-1 gene=maker-scaffold10x_2740_pilon-augustus-gene-0.1	2	2	2	2	2	2	3	3	100	Doubtful
24	8	maker-scaffold10x_37_pilon-augustus-gene-0.7-mRNA-1 transcript=maker-scaffold10x_37_pilon-augustus-gene-0.7-mRNA-1 gene=maker-scaffold10x_37_pilon-augustus-gene-0.7				33.7469	60.73	2.97	1105.21	Deamidation of Q(Q179)	Deamidation of Q(1)			Single Protein		maker-scaffold10x_37_pilon-augustus-gene-0.7-mRNA-1 transcript=maker-scaffold10x_37_pilon-augustus-gene-0.7-mRNA-1 gene=maker-scaffold10x_37_pilon-augustus-gene-0.7	1	1	1	1	1	1	1	1	100	Doubtful
24	11	maker-scaffold10x_1189_pilon-snap-gene-0.91-mRNA-1 transcript=maker-scaffold10x_1189_pilon-snap-gene-0.91-mRNA-1 gene=maker-scaffold10x_1189_pilon-snap-gene-0.91				24.583	77.98	4.59	1318.15	Deamidation of Q(Q14); Oxidation of M(M15)	Deamidation of Q(1); Oxidation of M(1)			Single Protein		maker-scaffold10x_1189_pilon-snap-gene-0.91-mRNA-1 transcript=maker-scaffold10x_1189_pilon-snap-gene-0.91-mRNA-1 gene=maker-scaffold10x_1189_pilon-snap-gene-0.91	1	1	1	1	1	1	1	1	92.3077	Doubtful
24	12	augustus_masked-scaffold10x_267_pilon-processed-gene-0.68-mRNA-1 transcript=augustus_masked-scaffold10x_267_pilon-processed-gene-0.68-mRNA-1 gene=augustus_masked-scaffold10x_267_pilon-processed-gene-0.68				72.118	69.02	1.84	462.731					Single Protein		augustus_masked-scaffold10x_267_pilon-processed-gene-0.68-mRNA-1 transcript=augustus_masked-scaffold10x_267_pilon-processed-gene-0.68-mRNA-1 gene=augustus_masked-scaffold10x_267_pilon-processed-gene-0.68	1	2	1	1	2	1	1	2	100	Doubtful
24	13	augustus_masked-scaffold10x_269_pilon-processed-gene-0.18-mRNA-1 transcript=augustus_masked-scaffold10x_269_pilon-processed-gene-0.18-mRNA-1 gene=augustus_masked-scaffold10x_269_pilon-processed-gene-0.18				41.6188	64.63	8.78	496.759					Related Proteins	augustus_masked-scaffold10x_269_pilon-processed-gene-0.22-mRNA-1 transcript=augustus_masked-scaffold10x_269_pilon-processed-gene-0.22-mRNA-1 gene=augustus_masked-scaffold10x_269_pilon-processed-gene-0.22, augustus_masked-scaffold10x_502_pilon-processed-gene-0.29-mRNA-1 transcript=augustus_masked-scaffold10x_502_pilon-processed-gene-0.29-mRNA-1 gene=augustus_masked-scaffold10x_502_pilon-processed-…	augustus_masked-scaffold10x_269_pilon-processed-gene-0.18-mRNA-1 transcript=augustus_masked-scaffold10x_269_pilon-processed-gene-0.18-mRNA-1 gene=augustus_masked-scaffold10x_269_pilon-processed-gene-0.18, augustus_masked-scaffold10x_269_pilon-processed-gene-0.22-mRNA-1 transcript=augustus_masked-scaffold10x_269_pilon-processed-gene-0.22-mRNA-1 gene=augustus_masked-scaffold10x_269_pilon-processed-…	4	4	0	0	4	4	5	5	100	Doubtful
24	14	maker-scaffold10x_1013_pilon-snap-gene-0.133-mRNA-1 transcript=maker-scaffold10x_1013_pilon-snap-gene-0.133-mRNA-1 gene=maker-scaffold10x_1013_pilon-snap-gene-0.133				16.8109	75.17	19.46	3848.52	Deamidation of N(N98)	Deamidation of N(1)			Related Proteins	maker-scaffold10x_208_pilon-snap-gene-0.18-mRNA-1 transcript=maker-scaffold10x_208_pilon-snap-gene-0.18-mRNA-1 gene=maker-scaffold10x_208_pilon-snap-gene-0.18	maker-scaffold10x_1013_pilon-snap-gene-0.133-mRNA-1 transcript=maker-scaffold10x_1013_pilon-snap-gene-0.133-mRNA-1 gene=maker-scaffold10x_1013_pilon-snap-gene-0.133, maker-scaffold10x_208_pilon-snap-gene-0.18-mRNA-1 transcript=maker-scaffold10x_208_pilon-snap-gene-0.18-mRNA-1 gene=maker-scaffold10x_208_pilon-snap-gene-0.18	2	3	3	2	3	2	2	3	100	Doubtful
24	16	maker-scaffold10x_466_pilon-snap-gene-0.92-mRNA-1 transcript=maker-scaffold10x_466_pilon-snap-gene-0.92-mRNA-1 gene=maker-scaffold10x_466_pilon-snap-gene-0.92				48.1419	58.14	2.09	0	Oxidation of M(M261)	Oxidation of M(1)			Single Protein		maker-scaffold10x_466_pilon-snap-gene-0.92-mRNA-1 transcript=maker-scaffold10x_466_pilon-snap-gene-0.92-mRNA-1 gene=maker-scaffold10x_466_pilon-snap-gene-0.92	1	1	1	1	1	1	0	2	100	Doubtful
24	17	maker-scaffold10x_14_pilon-pred_gff_StringTie-gene-0.66-mRNA-1 transcript=maker-scaffold10x_14_pilon-pred_gff_StringTie-gene-0.66-mRNA-1 gene=maker-scaffold10x_14_pilon-pred_gff_StringTie-gene-0.66				18.8657	22.62	7.14	3056.98			Deamidation of N (N11-{N11 N15})	Deamidation of N (1)	Single Protein		maker-scaffold10x_14_pilon-pred_gff_StringTie-gene-0.66-mRNA-1 transcript=maker-scaffold10x_14_pilon-pred_gff_StringTie-gene-0.66-mRNA-1 gene=maker-scaffold10x_14_pilon-pred_gff_StringTie-gene-0.66	1	1	1	1	1	1	1	1	100	Doubtful
24	18	maker-scaffold10x_439_pilon-augustus-gene-0.21-mRNA-1 transcript=maker-scaffold10x_439_pilon-augustus-gene-0.21-mRNA-1 gene=maker-scaffold10x_439_pilon-augustus-gene-0.21				27.2487	65.02	11.52	3724.98					Single Protein		maker-scaffold10x_439_pilon-augustus-gene-0.21-mRNA-1 transcript=maker-scaffold10x_439_pilon-augustus-gene-0.21-mRNA-1 gene=maker-scaffold10x_439_pilon-augustus-gene-0.21	3	6	6	3	6	3	4	8	100	Doubtful
24	19	maker-scaffold10x_457_pilon-snap-gene-0.53-mRNA-1 transcript=maker-scaffold10x_457_pilon-snap-gene-0.53-mRNA-1 gene=maker-scaffold10x_457_pilon-snap-gene-0.53				84.2423	38.26	2.02	0					Single Protein		maker-scaffold10x_457_pilon-snap-gene-0.53-mRNA-1 transcript=maker-scaffold10x_457_pilon-snap-gene-0.53-mRNA-1 gene=maker-scaffold10x_457_pilon-snap-gene-0.53	1	1	1	1	1	1	0	1	92.3077	Doubtful
25	1	maker-scaffold10x_1309_pilon-snap-gene-0.100-mRNA-1 transcript=maker-scaffold10x_1309_pilon-snap-gene-0.100-mRNA-1 gene=maker-scaffold10x_1309_pilon-snap-gene-0.100				12.3116	79.28	0	0					Single Protein		maker-scaffold10x_1309_pilon-snap-gene-0.100-mRNA-1 transcript=maker-scaffold10x_1309_pilon-snap-gene-0.100-mRNA-1 gene=maker-scaffold10x_1309_pilon-snap-gene-0.100	0	2	2	0	2	0	1	2	60	Doubtful
25	2	maker-scaffold10x_1453_pilon-snap-gene-0.18-mRNA-1 transcript=maker-scaffold10x_1453_pilon-snap-gene-0.18-mRNA-1 gene=maker-scaffold10x_1453_pilon-snap-gene-0.18				100.679	49.89	0	0					Single Protein		maker-scaffold10x_1453_pilon-snap-gene-0.18-mRNA-1 transcript=maker-scaffold10x_1453_pilon-snap-gene-0.18-mRNA-1 gene=maker-scaffold10x_1453_pilon-snap-gene-0.18	0	1	1	0	1	0	0	2	100	Doubtful
25	3	maker-scaffold10x_490_pilon-snap-gene-0.8-mRNA-1 transcript=maker-scaffold10x_490_pilon-snap-gene-0.8-mRNA-1 gene=maker-scaffold10x_490_pilon-snap-gene-0.8				36.7394	85.4	36.19	1083.99	Deamidation of Q(Q168, Q265); Oxidation of M(M72, M81, M94, M100, M132, M191, M197, M229)	Deamidation of Q(2); Oxidation of M(8)			Single Protein		maker-scaffold10x_490_pilon-snap-gene-0.8-mRNA-1 transcript=maker-scaffold10x_490_pilon-snap-gene-0.8-mRNA-1 gene=maker-scaffold10x_490_pilon-snap-gene-0.8	13	14	6	6	6	6	23	34	100	Doubtful
25	7	maker-scaffold10x_819_pilon-augustus-gene-0.18-mRNA-1 transcript=maker-scaffold10x_819_pilon-augustus-gene-0.18-mRNA-1 gene=maker-scaffold10x_819_pilon-augustus-gene-0.18				28.8853	67.86	6.35	1857.8					Single Protein		maker-scaffold10x_819_pilon-augustus-gene-0.18-mRNA-1 transcript=maker-scaffold10x_819_pilon-augustus-gene-0.18-mRNA-1 gene=maker-scaffold10x_819_pilon-augustus-gene-0.18	1	1	1	1	1	1	2	2	100	Doubtful
25	10	maker-scaffold10x_137_pilon-snap-gene-0.19-mRNA-1 transcript=maker-scaffold10x_137_pilon-snap-gene-0.19-mRNA-1 gene=maker-scaffold10x_137_pilon-snap-gene-0.19				204.281	75.98	0.49	240.579					Single Protein		maker-scaffold10x_137_pilon-snap-gene-0.19-mRNA-1 transcript=maker-scaffold10x_137_pilon-snap-gene-0.19-mRNA-1 gene=maker-scaffold10x_137_pilon-snap-gene-0.19	1	2	2	1	2	1	2	3	100	Doubtful
25	11	maker-scaffold10x_1184_pilon-snap-gene-0.31-mRNA-1 transcript=maker-scaffold10x_1184_pilon-snap-gene-0.31-mRNA-1 gene=maker-scaffold10x_1184_pilon-snap-gene-0.31				51.1535	84.49	29.89	594.138	Oxidation of M(M25, M34, M47, M53, M202, M211, M224, M230, M321, M327)	Oxidation of M(10)			Single Protein		maker-scaffold10x_1184_pilon-snap-gene-0.31-mRNA-1 transcript=maker-scaffold10x_1184_pilon-snap-gene-0.31-mRNA-1 gene=maker-scaffold10x_1184_pilon-snap-gene-0.31	9	10	2	2	2	2	11	15	100	Doubtful
25	12	maker-scaffold10x_1482_pilon-snap-gene-0.2-mRNA-1 transcript=maker-scaffold10x_1482_pilon-snap-gene-0.2-mRNA-1 gene=maker-scaffold10x_1482_pilon-snap-gene-0.2				100.811	90.29	0	0					Single Protein		maker-scaffold10x_1482_pilon-snap-gene-0.2-mRNA-1 transcript=maker-scaffold10x_1482_pilon-snap-gene-0.2-mRNA-1 gene=maker-scaffold10x_1482_pilon-snap-gene-0.2	0	1	1	0	1	0	0	1	66.6667	Doubtful
25	14	maker-scaffold10x_225_pilon-snap-gene-0.6-mRNA-1 transcript=maker-scaffold10x_225_pilon-snap-gene-0.6-mRNA-1 gene=maker-scaffold10x_225_pilon-snap-gene-0.6				110.684	76.57	0	0					Single Protein		maker-scaffold10x_225_pilon-snap-gene-0.6-mRNA-1 transcript=maker-scaffold10x_225_pilon-snap-gene-0.6-mRNA-1 gene=maker-scaffold10x_225_pilon-snap-gene-0.6	0	1	1	0	1	0	0	2	100	Doubtful
25	15	maker-scaffold10x_145_pilon-snap-gene-2.185-mRNA-1 transcript=maker-scaffold10x_145_pilon-snap-gene-2.185-mRNA-1 gene=maker-scaffold10x_145_pilon-snap-gene-2.185				217.574	57.43	0	0					Single Protein		maker-scaffold10x_145_pilon-snap-gene-2.185-mRNA-1 transcript=maker-scaffold10x_145_pilon-snap-gene-2.185-mRNA-1 gene=maker-scaffold10x_145_pilon-snap-gene-2.185	0	1	1	0	1	0	0	4	100	Doubtful
25	16	maker-scaffold10x_38_pilon-snap-gene-0.22-mRNA-1 transcript=maker-scaffold10x_38_pilon-snap-gene-0.22-mRNA-1 gene=maker-scaffold10x_38_pilon-snap-gene-0.22				62.1511	69.98	0	0					Single Protein		maker-scaffold10x_38_pilon-snap-gene-0.22-mRNA-1 transcript=maker-scaffold10x_38_pilon-snap-gene-0.22-mRNA-1 gene=maker-scaffold10x_38_pilon-snap-gene-0.22	0	1	1	0	1	0	0	2	100	Doubtful
25	18	maker-scaffold10x_439_pilon-augustus-gene-0.21-mRNA-1 transcript=maker-scaffold10x_439_pilon-augustus-gene-0.21-mRNA-1 gene=maker-scaffold10x_439_pilon-augustus-gene-0.21				27.2487	65.02	13.58	4272.95					Single Protein		maker-scaffold10x_439_pilon-augustus-gene-0.21-mRNA-1 transcript=maker-scaffold10x_439_pilon-augustus-gene-0.21-mRNA-1 gene=maker-scaffold10x_439_pilon-augustus-gene-0.21	3	5	5	3	5	3	5	12	100	Doubtful
26	1	maker-scaffold10x_1184_pilon-snap-gene-0.31-mRNA-1 transcript=maker-scaffold10x_1184_pilon-snap-gene-0.31-mRNA-1 gene=maker-scaffold10x_1184_pilon-snap-gene-0.31				51.1535	84.49	20.9	391.348					Single Protein		maker-scaffold10x_1184_pilon-snap-gene-0.31-mRNA-1 transcript=maker-scaffold10x_1184_pilon-snap-gene-0.31-mRNA-1 gene=maker-scaffold10x_1184_pilon-snap-gene-0.31	3	3	3	3	3	3	3	3	100	Doubtful
26	6	maker-scaffold10x_38_pilon-snap-gene-0.22-mRNA-1 transcript=maker-scaffold10x_38_pilon-snap-gene-0.22-mRNA-1 gene=maker-scaffold10x_38_pilon-snap-gene-0.22				62.1511	69.98	1.45	0					Single Protein		maker-scaffold10x_38_pilon-snap-gene-0.22-mRNA-1 transcript=maker-scaffold10x_38_pilon-snap-gene-0.22-mRNA-1 gene=maker-scaffold10x_38_pilon-snap-gene-0.22	1	1	1	1	1	1	0	4	100	Doubtful
26	8	augustus_masked-scaffold10x_269_pilon-processed-gene-0.18-mRNA-1 transcript=augustus_masked-scaffold10x_269_pilon-processed-gene-0.18-mRNA-1 gene=augustus_masked-scaffold10x_269_pilon-processed-gene-0.18				41.6188	64.63	4.26	561.411					Related Proteins	augustus_masked-scaffold10x_269_pilon-processed-gene-0.22-mRNA-1 transcript=augustus_masked-scaffold10x_269_pilon-processed-gene-0.22-mRNA-1 gene=augustus_masked-scaffold10x_269_pilon-processed-gene-0.22, augustus_masked-scaffold10x_502_pilon-processed-gene-0.29-mRNA-1 transcript=augustus_masked-scaffold10x_502_pilon-processed-gene-0.29-mRNA-1 gene=augustus_masked-scaffold10x_502_pilon-processed-…	augustus_masked-scaffold10x_269_pilon-processed-gene-0.18-mRNA-1 transcript=augustus_masked-scaffold10x_269_pilon-processed-gene-0.18-mRNA-1 gene=augustus_masked-scaffold10x_269_pilon-processed-gene-0.18, augustus_masked-scaffold10x_269_pilon-processed-gene-0.22-mRNA-1 transcript=augustus_masked-scaffold10x_269_pilon-processed-gene-0.22-mRNA-1 gene=augustus_masked-scaffold10x_269_pilon-processed-…	1	2	2	1	2	1	1	2	100	Doubtful
26	9	maker-scaffold10x_819_pilon-augustus-gene-0.18-mRNA-1 transcript=maker-scaffold10x_819_pilon-augustus-gene-0.18-mRNA-1 gene=maker-scaffold10x_819_pilon-augustus-gene-0.18				28.8853	67.86	6.35	1954.54					Single Protein		maker-scaffold10x_819_pilon-augustus-gene-0.18-mRNA-1 transcript=maker-scaffold10x_819_pilon-augustus-gene-0.18-mRNA-1 gene=maker-scaffold10x_819_pilon-augustus-gene-0.18	1	1	1	1	1	1	2	2	100	Doubtful
26	10	maker-scaffold10x_439_pilon-augustus-gene-0.21-mRNA-1 transcript=maker-scaffold10x_439_pilon-augustus-gene-0.21-mRNA-1 gene=maker-scaffold10x_439_pilon-augustus-gene-0.21				27.2487	65.02	22.63	4475.9					Single Protein		maker-scaffold10x_439_pilon-augustus-gene-0.21-mRNA-1 transcript=maker-scaffold10x_439_pilon-augustus-gene-0.21-mRNA-1 gene=maker-scaffold10x_439_pilon-augustus-gene-0.21	6	6	6	6	6	6	7	13	100	Doubtful
26	13	maker-scaffold10x_718_pilon-snap-gene-0.9-mRNA-1 transcript=maker-scaffold10x_718_pilon-snap-gene-0.9-mRNA-1 gene=maker-scaffold10x_718_pilon-snap-gene-0.9				25.9683	86.81	27.66	4483.95	Deamidation of N(N41)	Deamidation of N(1)	Deamidation of N (N167-{N167}), Deamidation of Q (Q169-{Q169 N170})	Deamidation of N (1), Deamidation of Q (1)	Single Protein		maker-scaffold10x_718_pilon-snap-gene-0.9-mRNA-1 transcript=maker-scaffold10x_718_pilon-snap-gene-0.9-mRNA-1 gene=maker-scaffold10x_718_pilon-snap-gene-0.9	6	7	7	6	7	6	8	15	100	Doubtful
27	5	maker-scaffold10x_1184_pilon-snap-gene-0.31-mRNA-1 transcript=maker-scaffold10x_1184_pilon-snap-gene-0.31-mRNA-1 gene=maker-scaffold10x_1184_pilon-snap-gene-0.31				51.1535	84.49	8.09	132.026					Related Proteins	maker-scaffold10x_2285_pilon-snap-gene-0.13-mRNA-1 transcript=maker-scaffold10x_2285_pilon-snap-gene-0.13-mRNA-1 gene=maker-scaffold10x_2285_pilon-snap-gene-0.13, maker-scaffold10x_490_pilon-snap-gene-0.5-mRNA-1 transcript=maker-scaffold10x_490_pilon-snap-gene-0.5-mRNA-1 gene=maker-scaffold10x_490_pilon-snap-gene-0.5, maker-scaffold10x_490_pilon-snap-gene-0.8-mRNA-1 transcript=maker-scaffold10x_4…	maker-scaffold10x_1184_pilon-snap-gene-0.31-mRNA-1 transcript=maker-scaffold10x_1184_pilon-snap-gene-0.31-mRNA-1 gene=maker-scaffold10x_1184_pilon-snap-gene-0.31, maker-scaffold10x_2285_pilon-snap-gene-0.13-mRNA-1 transcript=maker-scaffold10x_2285_pilon-snap-gene-0.13-mRNA-1 gene=maker-scaffold10x_2285_pilon-snap-gene-0.13, maker-scaffold10x_490_pilon-snap-gene-0.5-mRNA-1 transcript=maker-scaffol…	1	1	1	1	1	1	1	1	100	Doubtful
27	12	maker-scaffold10x_439_pilon-augustus-gene-0.21-mRNA-1 transcript=maker-scaffold10x_439_pilon-augustus-gene-0.21-mRNA-1 gene=maker-scaffold10x_439_pilon-augustus-gene-0.21				27.2487	65.02	39.92	6496.49	Oxidation of M(M55)	Oxidation of M(1)	Deamidation of Q (Q63-{N59 Q63})	Deamidation of Q (1)	Single Protein		maker-scaffold10x_439_pilon-augustus-gene-0.21-mRNA-1 transcript=maker-scaffold10x_439_pilon-augustus-gene-0.21-mRNA-1 gene=maker-scaffold10x_439_pilon-augustus-gene-0.21	13	13	13	13	13	13	28	37	100	Doubtful
28	1	maker-scaffold10x_2706_pilon-snap-gene-0.15-mRNA-1 transcript=maker-scaffold10x_2706_pilon-snap-gene-0.15-mRNA-1 gene=maker-scaffold10x_2706_pilon-snap-gene-0.15				36.4446	80.71	4.15	744.545					Single Protein		maker-scaffold10x_2706_pilon-snap-gene-0.15-mRNA-1 transcript=maker-scaffold10x_2706_pilon-snap-gene-0.15-mRNA-1 gene=maker-scaffold10x_2706_pilon-snap-gene-0.15	1	1	1	1	1	1	1	1	100	Doubtful
28	3	maker-scaffold10x_327_pilon-snap-gene-0.32-mRNA-1 transcript=maker-scaffold10x_327_pilon-snap-gene-0.32-mRNA-1 gene=maker-scaffold10x_327_pilon-snap-gene-0.32				166.703	78.28	0.62	156.995					Single Protein		maker-scaffold10x_327_pilon-snap-gene-0.32-mRNA-1 transcript=maker-scaffold10x_327_pilon-snap-gene-0.32-mRNA-1 gene=maker-scaffold10x_327_pilon-snap-gene-0.32	1	3	3	1	3	1	2	3	100	Doubtful
28	4	maker-scaffold10x_1194_pilon-snap-gene-0.52-mRNA-1 transcript=maker-scaffold10x_1194_pilon-snap-gene-0.52-mRNA-1 gene=maker-scaffold10x_1194_pilon-snap-gene-0.52				27.8961	53.97	10.32	1223.18	Oxidation of M(M247)	Oxidation of M(1)			Single Protein		maker-scaffold10x_1194_pilon-snap-gene-0.52-mRNA-1 transcript=maker-scaffold10x_1194_pilon-snap-gene-0.52-mRNA-1 gene=maker-scaffold10x_1194_pilon-snap-gene-0.52	2	2	1	1	1	1	1	2	100	Doubtful
28	5	maker-scaffold10x_1194_pilon-snap-gene-0.35-mRNA-1 transcript=maker-scaffold10x_1194_pilon-snap-gene-0.35-mRNA-1 gene=maker-scaffold10x_1194_pilon-snap-gene-0.35				47.4948	57.59	5.3	585.839					Single Protein		maker-scaffold10x_1194_pilon-snap-gene-0.35-mRNA-1 transcript=maker-scaffold10x_1194_pilon-snap-gene-0.35-mRNA-1 gene=maker-scaffold10x_1194_pilon-snap-gene-0.35	2	3	2	1	2	1	1	3	100	Doubtful
28	9	maker-scaffold10x_2740_pilon-augustus-gene-0.1-mRNA-1 transcript=maker-scaffold10x_2740_pilon-augustus-gene-0.1-mRNA-1 gene=maker-scaffold10x_2740_pilon-augustus-gene-0.1				23.0584	65	12.5	1669.64					Single Protein		maker-scaffold10x_2740_pilon-augustus-gene-0.1-mRNA-1 transcript=maker-scaffold10x_2740_pilon-augustus-gene-0.1-mRNA-1 gene=maker-scaffold10x_2740_pilon-augustus-gene-0.1	2	3	3	2	3	2	2	4	100	Doubtful
28	10	maker-scaffold10x_439_pilon-augustus-gene-0.21-mRNA-1 transcript=maker-scaffold10x_439_pilon-augustus-gene-0.21-mRNA-1 gene=maker-scaffold10x_439_pilon-augustus-gene-0.21				27.2487	65.02	16.46	3091.93					Single Protein		maker-scaffold10x_439_pilon-augustus-gene-0.21-mRNA-1 transcript=maker-scaffold10x_439_pilon-augustus-gene-0.21-mRNA-1 gene=maker-scaffold10x_439_pilon-augustus-gene-0.21	4	5	5	4	5	4	5	9	100	Doubtful
28	12	maker-scaffold10x_311_pilon-augustus-gene-0.72-mRNA-1 transcript=maker-scaffold10x_311_pilon-augustus-gene-0.72-mRNA-1 gene=maker-scaffold10x_311_pilon-augustus-gene-0.72				27.7772	80.63	3.16	879.916					Single Protein		maker-scaffold10x_311_pilon-augustus-gene-0.72-mRNA-1 transcript=maker-scaffold10x_311_pilon-augustus-gene-0.72-mRNA-1 gene=maker-scaffold10x_311_pilon-augustus-gene-0.72	1	1	1	1	1	1	1	1	100	Doubtful
28	14	maker-scaffold10x_445_pilon-augustus-gene-0.18-mRNA-1 transcript=maker-scaffold10x_445_pilon-augustus-gene-0.18-mRNA-1 gene=maker-scaffold10x_445_pilon-augustus-gene-0.18				37.1513	67.35	3.24	720.449					Single Protein		maker-scaffold10x_445_pilon-augustus-gene-0.18-mRNA-1 transcript=maker-scaffold10x_445_pilon-augustus-gene-0.18-mRNA-1 gene=maker-scaffold10x_445_pilon-augustus-gene-0.18	1	1	1	1	1	1	1	1	100	Doubtful
29	1	maker-scaffold10x_819_pilon-augustus-gene-0.18-mRNA-1 transcript=maker-scaffold10x_819_pilon-augustus-gene-0.18-mRNA-1 gene=maker-scaffold10x_819_pilon-augustus-gene-0.18				28.8853	85.71	21.83	9749.82	Oxidation of M(M236, M247)	Oxidation of M(2)			Single Protein		maker-scaffold10x_819_pilon-augustus-gene-0.18-mRNA-1 transcript=maker-scaffold10x_819_pilon-augustus-gene-0.18-mRNA-1 gene=maker-scaffold10x_819_pilon-augustus-gene-0.18	7	8	8	7	8	7	7	10	55.5556	Doubtful
29	3	maker-scaffold10x_1194_pilon-snap-gene-0.52-mRNA-1 transcript=maker-scaffold10x_1194_pilon-snap-gene-0.52-mRNA-1 gene=maker-scaffold10x_1194_pilon-snap-gene-0.52				27.8961	72.22	41.67	10157.5	Deamidation of N(N133); Deamidation of Q(Q135); Oxidation of M(M236, M247)	Deamidation of N(1); Deamidation of Q(1); Oxidation of M(2)			Single Protein		maker-scaffold10x_1194_pilon-snap-gene-0.52-mRNA-1 transcript=maker-scaffold10x_1194_pilon-snap-gene-0.52-mRNA-1 gene=maker-scaffold10x_1194_pilon-snap-gene-0.52	9	14	7	4	7	4	15	29	55.5556	Doubtful
29	4	maker-scaffold10x_1194_pilon-snap-gene-0.35-mRNA-1 transcript=maker-scaffold10x_1194_pilon-snap-gene-0.35-mRNA-1 gene=maker-scaffold10x_1194_pilon-snap-gene-0.35				47.4948	91.57	18.55	7496.81					Single Protein		maker-scaffold10x_1194_pilon-snap-gene-0.35-mRNA-1 transcript=maker-scaffold10x_1194_pilon-snap-gene-0.35-mRNA-1 gene=maker-scaffold10x_1194_pilon-snap-gene-0.35	6	10	3	1	3	1	13	28	55.5556	Doubtful
29	5	maker-scaffold10x_445_pilon-augustus-gene-0.18-mRNA-1 transcript=maker-scaffold10x_445_pilon-augustus-gene-0.18-mRNA-1 gene=maker-scaffold10x_445_pilon-augustus-gene-0.18				37.1513	90.88	3.24	2329.11					Single Protein		maker-scaffold10x_445_pilon-augustus-gene-0.18-mRNA-1 transcript=maker-scaffold10x_445_pilon-augustus-gene-0.18-mRNA-1 gene=maker-scaffold10x_445_pilon-augustus-gene-0.18	1	1	1	1	1	1	1	1	55.5556	Doubtful
29	7	maker-scaffold10x_147_pilon-snap-gene-0.16-mRNA-1 transcript=maker-scaffold10x_147_pilon-snap-gene-0.16-mRNA-1 gene=maker-scaffold10x_147_pilon-snap-gene-0.16				45.3912	100	11.28	1503.12					Single Protein		maker-scaffold10x_147_pilon-snap-gene-0.16-mRNA-1 transcript=maker-scaffold10x_147_pilon-snap-gene-0.16-mRNA-1 gene=maker-scaffold10x_147_pilon-snap-gene-0.16	3	5	4	2	4	2	2	7	55.5556	Doubtful
30	5	augustus_masked-scaffold10x_269_pilon-processed-gene-0.18-mRNA-1 transcript=augustus_masked-scaffold10x_269_pilon-processed-gene-0.18-mRNA-1 gene=augustus_masked-scaffold10x_269_pilon-processed-gene-0.18				41.6188	64.63	4.26	369.842					Related Proteins	augustus_masked-scaffold10x_269_pilon-processed-gene-0.22-mRNA-1 transcript=augustus_masked-scaffold10x_269_pilon-processed-gene-0.22-mRNA-1 gene=augustus_masked-scaffold10x_269_pilon-processed-gene-0.22, augustus_masked-scaffold10x_502_pilon-processed-gene-0.29-mRNA-1 transcript=augustus_masked-scaffold10x_502_pilon-processed-gene-0.29-mRNA-1 gene=augustus_masked-scaffold10x_502_pilon-processed-…	augustus_masked-scaffold10x_269_pilon-processed-gene-0.18-mRNA-1 transcript=augustus_masked-scaffold10x_269_pilon-processed-gene-0.18-mRNA-1 gene=augustus_masked-scaffold10x_269_pilon-processed-gene-0.18, augustus_masked-scaffold10x_269_pilon-processed-gene-0.22-mRNA-1 transcript=augustus_masked-scaffold10x_269_pilon-processed-gene-0.22-mRNA-1 gene=augustus_masked-scaffold10x_269_pilon-processed-…	1	1	0	0	1	1	1	1	100	Doubtful
30	8	maker-scaffold10x_439_pilon-augustus-gene-0.21-mRNA-1 transcript=maker-scaffold10x_439_pilon-augustus-gene-0.21-mRNA-1 gene=maker-scaffold10x_439_pilon-augustus-gene-0.21				27.2487	65.02	5.76	1545.12					Single Protein		maker-scaffold10x_439_pilon-augustus-gene-0.21-mRNA-1 transcript=maker-scaffold10x_439_pilon-augustus-gene-0.21-mRNA-1 gene=maker-scaffold10x_439_pilon-augustus-gene-0.21	1	2	2	1	2	1	1	2	100	Doubtful
30	14	maker-scaffold10x_137_pilon-snap-gene-0.19-mRNA-1 transcript=maker-scaffold10x_137_pilon-snap-gene-0.19-mRNA-1 gene=maker-scaffold10x_137_pilon-snap-gene-0.19				204.281	75.98	0.49	166.739					Single Protein		maker-scaffold10x_137_pilon-snap-gene-0.19-mRNA-1 transcript=maker-scaffold10x_137_pilon-snap-gene-0.19-mRNA-1 gene=maker-scaffold10x_137_pilon-snap-gene-0.19	1	2	2	1	2	1	1	2	100	Doubtful
31	4	maker-scaffold10x_377_pilon-snap-gene-0.46-mRNA-1 transcript=maker-scaffold10x_377_pilon-snap-gene-0.46-mRNA-1 gene=maker-scaffold10x_377_pilon-snap-gene-0.46				24.8098	65.93	7.96	602.551					Single Protein		maker-scaffold10x_377_pilon-snap-gene-0.46-mRNA-1 transcript=maker-scaffold10x_377_pilon-snap-gene-0.46-mRNA-1 gene=maker-scaffold10x_377_pilon-snap-gene-0.46	2	4	4	2	4	2	2	13	86.6667	Doubtful
32	5	maker-scaffold10x_2706_pilon-snap-gene-0.16-mRNA-1 transcript=maker-scaffold10x_2706_pilon-snap-gene-0.16-mRNA-1 gene=maker-scaffold10x_2706_pilon-snap-gene-0.16				36.9106	92.9	4.44	1076.85					Single Protein		maker-scaffold10x_2706_pilon-snap-gene-0.16-mRNA-1 transcript=maker-scaffold10x_2706_pilon-snap-gene-0.16-mRNA-1 gene=maker-scaffold10x_2706_pilon-snap-gene-0.16	1	1	1	1	1	1	1	1	100	Doubtful
33	5	maker-scaffold10x_377_pilon-snap-gene-0.46-mRNA-1 transcript=maker-scaffold10x_377_pilon-snap-gene-0.46-mRNA-1 gene=maker-scaffold10x_377_pilon-snap-gene-0.46				24.8098	65.93	7.96	6222.57					Single Protein		maker-scaffold10x_377_pilon-snap-gene-0.46-mRNA-1 transcript=maker-scaffold10x_377_pilon-snap-gene-0.46-mRNA-1 gene=maker-scaffold10x_377_pilon-snap-gene-0.46	3	3	3	3	3	3	14	23	100	Doubtful
33	6	maker-scaffold10x_38_pilon-snap-gene-0.22-mRNA-1 transcript=maker-scaffold10x_38_pilon-snap-gene-0.22-mRNA-1 gene=maker-scaffold10x_38_pilon-snap-gene-0.22				62.1511	69.98	1.45	955.26					Single Protein		maker-scaffold10x_38_pilon-snap-gene-0.22-mRNA-1 transcript=maker-scaffold10x_38_pilon-snap-gene-0.22-mRNA-1 gene=maker-scaffold10x_38_pilon-snap-gene-0.22	1	1	1	1	1	1	4	5	92.8571	Doubtful
33	11	snap_masked-scaffold10x_416_pilon-processed-gene-0.61-mRNA-1 transcript=snap_masked-scaffold10x_416_pilon-processed-gene-0.61-mRNA-1 gene=snap_masked-scaffold10x_416_pilon-processed-gene-0.61				416.622	58.32	0.35	0	Deamidation of N(N179)	Deamidation of N(1)			Single Protein		snap_masked-scaffold10x_416_pilon-processed-gene-0.61-mRNA-1 transcript=snap_masked-scaffold10x_416_pilon-processed-gene-0.61-mRNA-1 gene=snap_masked-scaffold10x_416_pilon-processed-gene-0.61	1	1	1	1	1	1	0	4	86.6667	Doubtful
34	2	maker-scaffold10x_1194_pilon-snap-gene-0.35-mRNA-1 transcript=maker-scaffold10x_1194_pilon-snap-gene-0.35-mRNA-1 gene=maker-scaffold10x_1194_pilon-snap-gene-0.35				47.4948	62.89	3.13	825.292					Single Protein		maker-scaffold10x_1194_pilon-snap-gene-0.35-mRNA-1 transcript=maker-scaffold10x_1194_pilon-snap-gene-0.35-mRNA-1 gene=maker-scaffold10x_1194_pilon-snap-gene-0.35	1	1	1	1	1	1	1	1	12.7796	Doubtful
34	5	maker-scaffold10x_439_pilon-augustus-gene-0.21-mRNA-1 transcript=maker-scaffold10x_439_pilon-augustus-gene-0.21-mRNA-1 gene=maker-scaffold10x_439_pilon-augustus-gene-0.21				27.2487	74.07	16.87	5807.61					Single Protein		maker-scaffold10x_439_pilon-augustus-gene-0.21-mRNA-1 transcript=maker-scaffold10x_439_pilon-augustus-gene-0.21-mRNA-1 gene=maker-scaffold10x_439_pilon-augustus-gene-0.21	5	5	5	5	5	5	8	14	12.7796	Doubtful
34	7	maker-scaffold10x_445_pilon-augustus-gene-0.18-mRNA-1 transcript=maker-scaffold10x_445_pilon-augustus-gene-0.18-mRNA-1 gene=maker-scaffold10x_445_pilon-augustus-gene-0.18				37.1513	67.35	3.24	1014.92					Single Protein		maker-scaffold10x_445_pilon-augustus-gene-0.18-mRNA-1 transcript=maker-scaffold10x_445_pilon-augustus-gene-0.18-mRNA-1 gene=maker-scaffold10x_445_pilon-augustus-gene-0.18	1	1	1	1	1	1	1	1	12.7796	Doubtful
34	11	maker-scaffold10x_137_pilon-snap-gene-0.19-mRNA-1 transcript=maker-scaffold10x_137_pilon-snap-gene-0.19-mRNA-1 gene=maker-scaffold10x_137_pilon-snap-gene-0.19				204.281	77.19	0.49	188.016					Single Protein		maker-scaffold10x_137_pilon-snap-gene-0.19-mRNA-1 transcript=maker-scaffold10x_137_pilon-snap-gene-0.19-mRNA-1 gene=maker-scaffold10x_137_pilon-snap-gene-0.19	1	4	4	1	4	1	1	4	12.7796	Doubtful
35	4	maker-scaffold10x_693_pilon-augustus-gene-0.35-mRNA-1 transcript=maker-scaffold10x_693_pilon-augustus-gene-0.35-mRNA-1 gene=maker-scaffold10x_693_pilon-augustus-gene-0.35				75.1325	60.12	2.11	465.21					Single Protein		maker-scaffold10x_693_pilon-augustus-gene-0.35-mRNA-1 transcript=maker-scaffold10x_693_pilon-augustus-gene-0.35-mRNA-1 gene=maker-scaffold10x_693_pilon-augustus-gene-0.35	1	1	1	1	1	1	1	1	100	Doubtful
35	7	maker-scaffold10x_265_pilon-snap-gene-0.26-mRNA-1 transcript=maker-scaffold10x_265_pilon-snap-gene-0.26-mRNA-1 gene=maker-scaffold10x_265_pilon-snap-gene-0.26				37.8465	63.16	10.82	2412.09					Single Protein		maker-scaffold10x_265_pilon-snap-gene-0.26-mRNA-1 transcript=maker-scaffold10x_265_pilon-snap-gene-0.26-mRNA-1 gene=maker-scaffold10x_265_pilon-snap-gene-0.26	4	4	4	4	4	4	7	12	100	Doubtful
36	1	augustus_masked-scaffold10x_269_pilon-processed-gene-0.18-mRNA-1 transcript=augustus_masked-scaffold10x_269_pilon-processed-gene-0.18-mRNA-1 gene=augustus_masked-scaffold10x_269_pilon-processed-gene-0.18				41.6188	59.04	10.64	805.677					Related Proteins	augustus_masked-scaffold10x_502_pilon-processed-gene-0.29-mRNA-1 transcript=augustus_masked-scaffold10x_502_pilon-processed-gene-0.29-mRNA-1 gene=augustus_masked-scaffold10x_502_pilon-processed-gene-0.29, maker-scaffold10x_502_pilon-augustus-gene-0.20-mRNA-1 transcript=maker-scaffold10x_502_pilon-augustus-gene-0.20-mRNA-1 gene=maker-scaffold10x_502_pilon-augustus-gene-0.20, maker-scaffold10x_502_…	augustus_masked-scaffold10x_269_pilon-processed-gene-0.18-mRNA-1 transcript=augustus_masked-scaffold10x_269_pilon-processed-gene-0.18-mRNA-1 gene=augustus_masked-scaffold10x_269_pilon-processed-gene-0.18, augustus_masked-scaffold10x_502_pilon-processed-gene-0.29-mRNA-1 transcript=augustus_masked-scaffold10x_502_pilon-processed-gene-0.29-mRNA-1 gene=augustus_masked-scaffold10x_502_pilon-processed-…	4	4	0	0	0	0	4	4	15.739	Doubtful
36	2	maker-scaffold10x_922_pilon-snap-gene-0.60-mRNA-1 transcript=maker-scaffold10x_922_pilon-snap-gene-0.60-mRNA-1 gene=maker-scaffold10x_922_pilon-snap-gene-0.60				88.3819	55.11	1.39	360.255			Deamidation of Q (Q713-{N712 Q713})	Deamidation of Q (1)	Single Protein		maker-scaffold10x_922_pilon-snap-gene-0.60-mRNA-1 transcript=maker-scaffold10x_922_pilon-snap-gene-0.60-mRNA-1 gene=maker-scaffold10x_922_pilon-snap-gene-0.60	1	1	1	1	1	1	1	1	15.739	Doubtful
36	6	augustus_masked-scaffold10x_1318_pilon-processed-gene-0.40-mRNA-1 transcript=augustus_masked-scaffold10x_1318_pilon-processed-gene-0.40-mRNA-1 gene=augustus_masked-scaffold10x_1318_pilon-processed-gene-0.40				14.4319	78.36	6.72	1712.56					Related Proteins	augustus_masked-scaffold10x_377_pilon-processed-gene-0.182-mRNA-1 transcript=augustus_masked-scaffold10x_377_pilon-processed-gene-0.182-mRNA-1 gene=augustus_masked-scaffold10x_377_pilon-processed-gene-0.182, maker-scaffold10x_1697_pilon-snap-gene-0.105-mRNA-1 transcript=maker-scaffold10x_1697_pilon-snap-gene-0.105-mRNA-1 gene=maker-scaffold10x_1697_pilon-snap-gene-0.105	augustus_masked-scaffold10x_1318_pilon-processed-gene-0.40-mRNA-1 transcript=augustus_masked-scaffold10x_1318_pilon-processed-gene-0.40-mRNA-1 gene=augustus_masked-scaffold10x_1318_pilon-processed-gene-0.40, augustus_masked-scaffold10x_377_pilon-processed-gene-0.182-mRNA-1 transcript=augustus_masked-scaffold10x_377_pilon-processed-gene-0.182-mRNA-1 gene=augustus_masked-scaffold10x_377_pilon-proce…	1	1	1	1	1	1	1	1	15.739	Doubtful
36	13	augustus_masked-scaffold10x_269_pilon-processed-gene-0.18-mRNA-1 transcript=augustus_masked-scaffold10x_269_pilon-processed-gene-0.18-mRNA-1 gene=augustus_masked-scaffold10x_269_pilon-processed-gene-0.18				41.6188	59.04	12.77	601.276					Related Proteins	augustus_masked-scaffold10x_269_pilon-processed-gene-0.22-mRNA-1 transcript=augustus_masked-scaffold10x_269_pilon-processed-gene-0.22-mRNA-1 gene=augustus_masked-scaffold10x_269_pilon-processed-gene-0.22, augustus_masked-scaffold10x_502_pilon-processed-gene-0.29-mRNA-1 transcript=augustus_masked-scaffold10x_502_pilon-processed-gene-0.29-mRNA-1 gene=augustus_masked-scaffold10x_502_pilon-processed-…	augustus_masked-scaffold10x_269_pilon-processed-gene-0.18-mRNA-1 transcript=augustus_masked-scaffold10x_269_pilon-processed-gene-0.18-mRNA-1 gene=augustus_masked-scaffold10x_269_pilon-processed-gene-0.18, augustus_masked-scaffold10x_269_pilon-processed-gene-0.22-mRNA-1 transcript=augustus_masked-scaffold10x_269_pilon-processed-gene-0.22-mRNA-1 gene=augustus_masked-scaffold10x_269_pilon-processed-…	5	5	0	0	0	0	5	5	15.739	Doubtful
36	15	augustus_masked-scaffold10x_269_pilon-processed-gene-0.18-mRNA-1 transcript=augustus_masked-scaffold10x_269_pilon-processed-gene-0.18-mRNA-1 gene=augustus_masked-scaffold10x_269_pilon-processed-gene-0.18				41.6188	59.04	11.97	479.115					Related Proteins	augustus_masked-scaffold10x_269_pilon-processed-gene-0.22-mRNA-1 transcript=augustus_masked-scaffold10x_269_pilon-processed-gene-0.22-mRNA-1 gene=augustus_masked-scaffold10x_269_pilon-processed-gene-0.22, augustus_masked-scaffold10x_502_pilon-processed-gene-0.29-mRNA-1 transcript=augustus_masked-scaffold10x_502_pilon-processed-gene-0.29-mRNA-1 gene=augustus_masked-scaffold10x_502_pilon-processed-…	augustus_masked-scaffold10x_269_pilon-processed-gene-0.18-mRNA-1 transcript=augustus_masked-scaffold10x_269_pilon-processed-gene-0.18-mRNA-1 gene=augustus_masked-scaffold10x_269_pilon-processed-gene-0.18, augustus_masked-scaffold10x_269_pilon-processed-gene-0.22-mRNA-1 transcript=augustus_masked-scaffold10x_269_pilon-processed-gene-0.22-mRNA-1 gene=augustus_masked-scaffold10x_269_pilon-processed-…	4	4	0	0	0	0	4	4	15.739	Doubtful
36	17	augustus_masked-scaffold10x_2264_pilon-processed-gene-0.1-mRNA-1 transcript=augustus_masked-scaffold10x_2264_pilon-processed-gene-0.1-mRNA-1 gene=augustus_masked-scaffold10x_2264_pilon-processed-gene-0.1				13.6686	100	15.57	3448.51					Related Proteins	augustus_masked-scaffold10x_2264_pilon-processed-gene-0.2-mRNA-1 transcript=augustus_masked-scaffold10x_2264_pilon-processed-gene-0.2-mRNA-1 gene=augustus_masked-scaffold10x_2264_pilon-processed-gene-0.2, maker-scaffold10x_281_pilon-pred_gff_StringTie-gene-0.88-mRNA-1 transcript=maker-scaffold10x_281_pilon-pred_gff_StringTie-gene-0.88-mRNA-1 gene=maker-scaffold10x_281_pilon-pred_gff_StringTie-gen…	augustus_masked-scaffold10x_2264_pilon-processed-gene-0.1-mRNA-1 transcript=augustus_masked-scaffold10x_2264_pilon-processed-gene-0.1-mRNA-1 gene=augustus_masked-scaffold10x_2264_pilon-processed-gene-0.1, augustus_masked-scaffold10x_2264_pilon-processed-gene-0.2-mRNA-1 transcript=augustus_masked-scaffold10x_2264_pilon-processed-gene-0.2-mRNA-1 gene=augustus_masked-scaffold10x_2264_pilon-processed…	3	4	4	3	4	3	3	4	15.739	Doubtful
36	19	maker-scaffold10x_281_pilon-snap-gene-0.160-mRNA-1 transcript=maker-scaffold10x_281_pilon-snap-gene-0.160-mRNA-1 gene=maker-scaffold10x_281_pilon-snap-gene-0.160				26.3538	100	18.72	683.565					Single Protein		maker-scaffold10x_281_pilon-snap-gene-0.160-mRNA-1 transcript=maker-scaffold10x_281_pilon-snap-gene-0.160-mRNA-1 gene=maker-scaffold10x_281_pilon-snap-gene-0.160	2	2	2	2	2	2	2	2	15.739	Doubtful
38	4	maker-scaffold10x_439_pilon-augustus-gene-0.21-mRNA-1 transcript=maker-scaffold10x_439_pilon-augustus-gene-0.21-mRNA-1 gene=maker-scaffold10x_439_pilon-augustus-gene-0.21				27.2487	65.02	10.29	2753.1					Single Protein		maker-scaffold10x_439_pilon-augustus-gene-0.21-mRNA-1 transcript=maker-scaffold10x_439_pilon-augustus-gene-0.21-mRNA-1 gene=maker-scaffold10x_439_pilon-augustus-gene-0.21	2	3	3	2	3	2	2	3	8.69565	Doubtful
38	10	maker-scaffold10x_137_pilon-snap-gene-0.19-mRNA-1 transcript=maker-scaffold10x_137_pilon-snap-gene-0.19-mRNA-1 gene=maker-scaffold10x_137_pilon-snap-gene-0.19				204.281	75.98	0.49	198.065					Single Protein		maker-scaffold10x_137_pilon-snap-gene-0.19-mRNA-1 transcript=maker-scaffold10x_137_pilon-snap-gene-0.19-mRNA-1 gene=maker-scaffold10x_137_pilon-snap-gene-0.19	1	1	1	1	1	1	1	1	15.1515	Doubtful
39	4	maker-scaffold10x_38_pilon-snap-gene-0.22-mRNA-1 transcript=maker-scaffold10x_38_pilon-snap-gene-0.22-mRNA-1 gene=maker-scaffold10x_38_pilon-snap-gene-0.22				62.1511	69.98	1.45	1155.31					Single Protein		maker-scaffold10x_38_pilon-snap-gene-0.22-mRNA-1 transcript=maker-scaffold10x_38_pilon-snap-gene-0.22-mRNA-1 gene=maker-scaffold10x_38_pilon-snap-gene-0.22	1	1	1	1	1	1	2	3	91.6667	Doubtful
39	9	maker-scaffold10x_1006_pilon-snap-gene-0.67-mRNA-1 transcript=maker-scaffold10x_1006_pilon-snap-gene-0.67-mRNA-1 gene=maker-scaffold10x_1006_pilon-snap-gene-0.67				52.7555	89.23	2.64	614.472			Deamidation of N (N284-{N284 Q286})	Deamidation of N (1)	Single Protein		maker-scaffold10x_1006_pilon-snap-gene-0.67-mRNA-1 transcript=maker-scaffold10x_1006_pilon-snap-gene-0.67-mRNA-1 gene=maker-scaffold10x_1006_pilon-snap-gene-0.67	1	1	1	1	1	1	1	1	100	Doubtful
39	11	maker-scaffold10x_137_pilon-snap-gene-0.19-mRNA-1 transcript=maker-scaffold10x_137_pilon-snap-gene-0.19-mRNA-1 gene=maker-scaffold10x_137_pilon-snap-gene-0.19				204.281	75.98	0.49	167.617					Single Protein		maker-scaffold10x_137_pilon-snap-gene-0.19-mRNA-1 transcript=maker-scaffold10x_137_pilon-snap-gene-0.19-mRNA-1 gene=maker-scaffold10x_137_pilon-snap-gene-0.19	1	2	2	1	2	1	1	2	100	Doubtful
41	2	maker-scaffold10x_1326_pilon-snap-gene-0.58-mRNA-1 transcript=maker-scaffold10x_1326_pilon-snap-gene-0.58-mRNA-1 gene=maker-scaffold10x_1326_pilon-snap-gene-0.58				101.797	60.13	0	0					Single Protein		maker-scaffold10x_1326_pilon-snap-gene-0.58-mRNA-1 transcript=maker-scaffold10x_1326_pilon-snap-gene-0.58-mRNA-1 gene=maker-scaffold10x_1326_pilon-snap-gene-0.58	0	1	1	0	1	0	0	1	70	Doubtful
41	7	maker-scaffold10x_1420_pilon-snap-gene-0.45-mRNA-1 transcript=maker-scaffold10x_1420_pilon-snap-gene-0.45-mRNA-1 gene=maker-scaffold10x_1420_pilon-snap-gene-0.45				31.7549	100	5.49	1802.72					Single Protein		maker-scaffold10x_1420_pilon-snap-gene-0.45-mRNA-1 transcript=maker-scaffold10x_1420_pilon-snap-gene-0.45-mRNA-1 gene=maker-scaffold10x_1420_pilon-snap-gene-0.45	1	1	1	1	1	1	1	1	100	Doubtful
42	1	augustus_masked-scaffold10x_1302_pilon-processed-gene-0.32-mRNA-1 transcript=augustus_masked-scaffold10x_1302_pilon-processed-gene-0.32-mRNA-1 gene=augustus_masked-scaffold10x_1302_pilon-processed-gene-0.32				223.054	96.51	0	0					Single Protein		augustus_masked-scaffold10x_1302_pilon-processed-gene-0.32-mRNA-1 transcript=augustus_masked-scaffold10x_1302_pilon-processed-gene-0.32-mRNA-1 gene=augustus_masked-scaffold10x_1302_pilon-processed-gene-0.32	0	2	2	0	2	0	0	2	88.2353	Doubtful
42	7	snap_masked-scaffold10x_416_pilon-processed-gene-0.61-mRNA-1 transcript=snap_masked-scaffold10x_416_pilon-processed-gene-0.61-mRNA-1 gene=snap_masked-scaffold10x_416_pilon-processed-gene-0.61				416.622	75.53	0.35	173.176			Deamidation of N (N179-{N176 N179})	Deamidation of N (1)	Single Protein		snap_masked-scaffold10x_416_pilon-processed-gene-0.61-mRNA-1 transcript=snap_masked-scaffold10x_416_pilon-processed-gene-0.61-mRNA-1 gene=snap_masked-scaffold10x_416_pilon-processed-gene-0.61	1	1	1	1	1	1	1	1	100	Doubtful
42	8	maker-scaffold10x_1013_pilon-snap-gene-0.119-mRNA-1 transcript=maker-scaffold10x_1013_pilon-snap-gene-0.119-mRNA-1 gene=maker-scaffold10x_1013_pilon-snap-gene-0.119				155.681	71.09	0.57	0					Single Protein		maker-scaffold10x_1013_pilon-snap-gene-0.119-mRNA-1 transcript=maker-scaffold10x_1013_pilon-snap-gene-0.119-mRNA-1 gene=maker-scaffold10x_1013_pilon-snap-gene-0.119	1	1	1	1	1	1	0	4	88.2353	Doubtful
43	1	maker-scaffold10x_783_pilon-augustus-gene-0.27-mRNA-1 transcript=maker-scaffold10x_783_pilon-augustus-gene-0.27-mRNA-1 gene=maker-scaffold10x_783_pilon-augustus-gene-0.27				19.4168	63.74	14.04	12098.5					Single Protein		maker-scaffold10x_783_pilon-augustus-gene-0.27-mRNA-1 transcript=maker-scaffold10x_783_pilon-augustus-gene-0.27-mRNA-1 gene=maker-scaffold10x_783_pilon-augustus-gene-0.27	3	5	5	3	5	3	2	6	60.7143	Doubtful
43	8	maker-scaffold10x_265_pilon-snap-gene-0.26-mRNA-1 transcript=maker-scaffold10x_265_pilon-snap-gene-0.26-mRNA-1 gene=maker-scaffold10x_265_pilon-snap-gene-0.26				37.8465	100	0	0					Single Protein		maker-scaffold10x_265_pilon-snap-gene-0.26-mRNA-1 transcript=maker-scaffold10x_265_pilon-snap-gene-0.26-mRNA-1 gene=maker-scaffold10x_265_pilon-snap-gene-0.26	0	3	3	0	3	0	0	4	50	Doubtful
44	1	maker-scaffold10x_783_pilon-augustus-gene-0.27-mRNA-1 transcript=maker-scaffold10x_783_pilon-augustus-gene-0.27-mRNA-1 gene=maker-scaffold10x_783_pilon-augustus-gene-0.27				19.4168	63.74	21.05	10301.8					Single Protein		maker-scaffold10x_783_pilon-augustus-gene-0.27-mRNA-1 transcript=maker-scaffold10x_783_pilon-augustus-gene-0.27-mRNA-1 gene=maker-scaffold10x_783_pilon-augustus-gene-0.27	3	4	4	3	4	3	3	4	100	Doubtful
44	4	maker-scaffold10x_265_pilon-snap-gene-0.26-mRNA-1 transcript=maker-scaffold10x_265_pilon-snap-gene-0.26-mRNA-1 gene=maker-scaffold10x_265_pilon-snap-gene-0.26				37.8465	83.63	7.89	3283.34					Single Protein		maker-scaffold10x_265_pilon-snap-gene-0.26-mRNA-1 transcript=maker-scaffold10x_265_pilon-snap-gene-0.26-mRNA-1 gene=maker-scaffold10x_265_pilon-snap-gene-0.26	3	3	3	3	3	3	3	3	92.3077	Doubtful
45	3	maker-scaffold10x_265_pilon-snap-gene-0.26-mRNA-1 transcript=maker-scaffold10x_265_pilon-snap-gene-0.26-mRNA-1 gene=maker-scaffold10x_265_pilon-snap-gene-0.26				37.8465	100	2.34	0					Single Protein		maker-scaffold10x_265_pilon-snap-gene-0.26-mRNA-1 transcript=maker-scaffold10x_265_pilon-snap-gene-0.26-mRNA-1 gene=maker-scaffold10x_265_pilon-snap-gene-0.26	1	3	3	1	3	1	0	5	90.9091	Doubtful
45	6	maker-scaffold10x_38_pilon-snap-gene-0.22-mRNA-1 transcript=maker-scaffold10x_38_pilon-snap-gene-0.22-mRNA-1 gene=maker-scaffold10x_38_pilon-snap-gene-0.22				62.1511	87.52	1.45	0					Single Protein		maker-scaffold10x_38_pilon-snap-gene-0.22-mRNA-1 transcript=maker-scaffold10x_38_pilon-snap-gene-0.22-mRNA-1 gene=maker-scaffold10x_38_pilon-snap-gene-0.22	1	1	1	1	1	1	0	1	90.9091	Doubtful
46	5	maker-scaffold10x_908_pilon-augustus-gene-1.138-mRNA-1 transcript=maker-scaffold10x_908_pilon-augustus-gene-1.138-mRNA-1 gene=maker-scaffold10x_908_pilon-augustus-gene-1.138				53.4783	86.31	0	0					Single Protein		maker-scaffold10x_908_pilon-augustus-gene-1.138-mRNA-1 transcript=maker-scaffold10x_908_pilon-augustus-gene-1.138-mRNA-1 gene=maker-scaffold10x_908_pilon-augustus-gene-1.138	0	1	1	0	1	0	1	1	75	Doubtful
46	7	maker-scaffold10x_318_pilon-snap-gene-0.83-mRNA-1 transcript=maker-scaffold10x_318_pilon-snap-gene-0.83-mRNA-1 gene=maker-scaffold10x_318_pilon-snap-gene-0.83				11.6709	100	10.28	4512.05					Single Protein		maker-scaffold10x_318_pilon-snap-gene-0.83-mRNA-1 transcript=maker-scaffold10x_318_pilon-snap-gene-0.83-mRNA-1 gene=maker-scaffold10x_318_pilon-snap-gene-0.83	1	1	1	1	1	1	1	1	100	Doubtful
46	8	snap_masked-scaffold10x_416_pilon-processed-gene-0.61-mRNA-1 transcript=snap_masked-scaffold10x_416_pilon-processed-gene-0.61-mRNA-1 gene=snap_masked-scaffold10x_416_pilon-processed-gene-0.61				416.622	75.53	0.35	170.236			Deamidation of N (N179-{N176 N179})	Deamidation of N (1)	Single Protein		snap_masked-scaffold10x_416_pilon-processed-gene-0.61-mRNA-1 transcript=snap_masked-scaffold10x_416_pilon-processed-gene-0.61-mRNA-1 gene=snap_masked-scaffold10x_416_pilon-processed-gene-0.61	1	1	1	1	1	1	1	1	100	Doubtful
47	2	maker-scaffold10x_377_pilon-snap-gene-0.47-mRNA-1 transcript=maker-scaffold10x_377_pilon-snap-gene-0.47-mRNA-1 gene=maker-scaffold10x_377_pilon-snap-gene-0.47				181.517	84.49	1.29	0	Deamidation of N(N415)	Deamidation of N(1)			Single Protein		maker-scaffold10x_377_pilon-snap-gene-0.47-mRNA-1 transcript=maker-scaffold10x_377_pilon-snap-gene-0.47-mRNA-1 gene=maker-scaffold10x_377_pilon-snap-gene-0.47	1	1	1	1	1	1	0	1	66.6667	Doubtful
47	4	maker-scaffold10x_332_pilon-augustus-gene-0.12-mRNA-1 transcript=maker-scaffold10x_332_pilon-augustus-gene-0.12-mRNA-1 gene=maker-scaffold10x_332_pilon-augustus-gene-0.12				755.455	84.12	0.22	0					Single Protein		maker-scaffold10x_332_pilon-augustus-gene-0.12-mRNA-1 transcript=maker-scaffold10x_332_pilon-augustus-gene-0.12-mRNA-1 gene=maker-scaffold10x_332_pilon-augustus-gene-0.12	1	1	1	1	1	1	0	1	100	Doubtful
47	7	maker-scaffold10x_61_pilon-snap-gene-0.36-mRNA-1 transcript=maker-scaffold10x_61_pilon-snap-gene-0.36-mRNA-1 gene=maker-scaffold10x_61_pilon-snap-gene-0.36				15.8157	52.6	33.77	43938.3	Deamidation of N(N37); Oxidation of M(M9, M118)	Deamidation of N(1); Oxidation of M(2)			Single Protein		maker-scaffold10x_61_pilon-snap-gene-0.36-mRNA-1 transcript=maker-scaffold10x_61_pilon-snap-gene-0.36-mRNA-1 gene=maker-scaffold10x_61_pilon-snap-gene-0.36	7	8	8	7	8	7	24	29	100	Doubtful
48	2	maker-scaffold10x_245_pilon-snap-gene-0.128-mRNA-1 transcript=maker-scaffold10x_245_pilon-snap-gene-0.128-mRNA-1 gene=maker-scaffold10x_245_pilon-snap-gene-0.128				113.972	83.05	1.04	894.481					Single Protein		maker-scaffold10x_245_pilon-snap-gene-0.128-mRNA-1 transcript=maker-scaffold10x_245_pilon-snap-gene-0.128-mRNA-1 gene=maker-scaffold10x_245_pilon-snap-gene-0.128	1	1	1	1	1	1	1	1	60	Doubtful
48	6	maker-scaffold10x_61_pilon-snap-gene-0.36-mRNA-1 transcript=maker-scaffold10x_61_pilon-snap-gene-0.36-mRNA-1 gene=maker-scaffold10x_61_pilon-snap-gene-0.36				15.8157	52.6	10.39	9684.69					Single Protein		maker-scaffold10x_61_pilon-snap-gene-0.36-mRNA-1 transcript=maker-scaffold10x_61_pilon-snap-gene-0.36-mRNA-1 gene=maker-scaffold10x_61_pilon-snap-gene-0.36	1	1	1	1	1	1	1	1	60	Doubtful
49	1	maker-scaffold10x_1708_pilon-snap-gene-0.5-mRNA-1 transcript=maker-scaffold10x_1708_pilon-snap-gene-0.5-mRNA-1 gene=maker-scaffold10x_1708_pilon-snap-gene-0.5				170.758	83.34	0.84	686.672					Single Protein		maker-scaffold10x_1708_pilon-snap-gene-0.5-mRNA-1 transcript=maker-scaffold10x_1708_pilon-snap-gene-0.5-mRNA-1 gene=maker-scaffold10x_1708_pilon-snap-gene-0.5	1	1	1	1	1	1	1	1	100	Doubtful
49	3	maker-scaffold10x_1010_pilon-snap-gene-0.110-mRNA-1 transcript=maker-scaffold10x_1010_pilon-snap-gene-0.110-mRNA-1 gene=maker-scaffold10x_1010_pilon-snap-gene-0.110				126.687	85.04	0.77	899.826	Deamidation of N(N629)	Deamidation of N(1)			Single Protein		maker-scaffold10x_1010_pilon-snap-gene-0.110-mRNA-1 transcript=maker-scaffold10x_1010_pilon-snap-gene-0.110-mRNA-1 gene=maker-scaffold10x_1010_pilon-snap-gene-0.110	1	1	1	1	1	1	1	1	100	Doubtful
49	7	maker-scaffold10x_1549_pilon-augustus-gene-0.49-mRNA-1 transcript=maker-scaffold10x_1549_pilon-augustus-gene-0.49-mRNA-1 gene=maker-scaffold10x_1549_pilon-augustus-gene-0.49				43.3466	100	2.95	2385.86					Single Protein		maker-scaffold10x_1549_pilon-augustus-gene-0.49-mRNA-1 transcript=maker-scaffold10x_1549_pilon-augustus-gene-0.49-mRNA-1 gene=maker-scaffold10x_1549_pilon-augustus-gene-0.49	1	1	1	1	1	1	1	1	100	Doubtful
50	5	maker-scaffold10x_815_pilon-snap-gene-1.98-mRNA-1 transcript=maker-scaffold10x_815_pilon-snap-gene-1.98-mRNA-1 gene=maker-scaffold10x_815_pilon-snap-gene-1.98				71.8093	84.34	2.06	1431.63					Single Protein		maker-scaffold10x_815_pilon-snap-gene-1.98-mRNA-1 transcript=maker-scaffold10x_815_pilon-snap-gene-1.98-mRNA-1 gene=maker-scaffold10x_815_pilon-snap-gene-1.98	1	1	1	1	1	1	1	1	100	Doubtful
50	7	maker-scaffold10x_481_pilon-snap-gene-0.104-mRNA-1 transcript=maker-scaffold10x_481_pilon-snap-gene-0.104-mRNA-1 gene=maker-scaffold10x_481_pilon-snap-gene-0.104				140.363	79.26	1.11	0					Single Protein		maker-scaffold10x_481_pilon-snap-gene-0.104-mRNA-1 transcript=maker-scaffold10x_481_pilon-snap-gene-0.104-mRNA-1 gene=maker-scaffold10x_481_pilon-snap-gene-0.104	1	1	1	1	1	1	0	1	100	Doubtful
51	2	snap_masked-scaffold10x_653_pilon-processed-gene-0.12-mRNA-1 transcript=snap_masked-scaffold10x_653_pilon-processed-gene-0.12-mRNA-1 gene=snap_masked-scaffold10x_653_pilon-processed-gene-0.12				20.1594	100	4.57	0	Deamidation of N(N156)	Deamidation of N(1)			Related Proteins	maker-scaffold10x_653_pilon-augustus-gene-0.31-mRNA-1 transcript=maker-scaffold10x_653_pilon-augustus-gene-0.31-mRNA-1 gene=maker-scaffold10x_653_pilon-augustus-gene-0.31	maker-scaffold10x_653_pilon-augustus-gene-0.31-mRNA-1 transcript=maker-scaffold10x_653_pilon-augustus-gene-0.31-mRNA-1 gene=maker-scaffold10x_653_pilon-augustus-gene-0.31, snap_masked-scaffold10x_653_pilon-processed-gene-0.12-mRNA-1 transcript=snap_masked-scaffold10x_653_pilon-processed-gene-0.12-mRNA-1 gene=snap_masked-scaffold10x_653_pilon-processed-gene-0.12	1	1	1	1	1	1	0	1	100	Doubtful
51	4	maker-scaffold10x_56_pilon-augustus-gene-0.84-mRNA-1 transcript=maker-scaffold10x_56_pilon-augustus-gene-0.84-mRNA-1 gene=maker-scaffold10x_56_pilon-augustus-gene-0.84				11.8212	100	20.2	0	Oxidation of M(M39)	Oxidation of M(1)			Single Protein		maker-scaffold10x_56_pilon-augustus-gene-0.84-mRNA-1 transcript=maker-scaffold10x_56_pilon-augustus-gene-0.84-mRNA-1 gene=maker-scaffold10x_56_pilon-augustus-gene-0.84	1	1	1	1	1	1	0	1	100	Doubtful
51	7	maker-scaffold10x_815_pilon-snap-gene-1.98-mRNA-1 transcript=maker-scaffold10x_815_pilon-snap-gene-1.98-mRNA-1 gene=maker-scaffold10x_815_pilon-snap-gene-1.98				71.8093	84.34	2.06	0					Single Protein		maker-scaffold10x_815_pilon-snap-gene-1.98-mRNA-1 transcript=maker-scaffold10x_815_pilon-snap-gene-1.98-mRNA-1 gene=maker-scaffold10x_815_pilon-snap-gene-1.98	1	1	1	1	1	1	0	1	100	Doubtful
54	2	maker-scaffold10x_1010_pilon-snap-gene-0.110-mRNA-1 transcript=maker-scaffold10x_1010_pilon-snap-gene-0.110-mRNA-1 gene=maker-scaffold10x_1010_pilon-snap-gene-0.110				126.687	85.04	0.77	973.111	Deamidation of N(N629)	Deamidation of N(1)			Single Protein		maker-scaffold10x_1010_pilon-snap-gene-0.110-mRNA-1 transcript=maker-scaffold10x_1010_pilon-snap-gene-0.110-mRNA-1 gene=maker-scaffold10x_1010_pilon-snap-gene-0.110	1	1	1	1	1	1	1	1	100	Doubtful
55	5	maker-scaffold10x_815_pilon-snap-gene-1.98-mRNA-1 transcript=maker-scaffold10x_815_pilon-snap-gene-1.98-mRNA-1 gene=maker-scaffold10x_815_pilon-snap-gene-1.98				71.8093	84.34	2.06	0					Single Protein		maker-scaffold10x_815_pilon-snap-gene-1.98-mRNA-1 transcript=maker-scaffold10x_815_pilon-snap-gene-1.98-mRNA-1 gene=maker-scaffold10x_815_pilon-snap-gene-1.98	1	1	1	1	1	1	0	2	100	Doubtful
55	6	maker-scaffold10x_1072_pilon-snap-gene-0.18-mRNA-1 transcript=maker-scaffold10x_1072_pilon-snap-gene-0.18-mRNA-1 gene=maker-scaffold10x_1072_pilon-snap-gene-0.18				367.415	73.99	0.36	0	Oxidation of M(M2941)	Oxidation of M(1)			Single Protein		maker-scaffold10x_1072_pilon-snap-gene-0.18-mRNA-1 transcript=maker-scaffold10x_1072_pilon-snap-gene-0.18-mRNA-1 gene=maker-scaffold10x_1072_pilon-snap-gene-0.18	1	1	1	1	1	1	0	1	100	Doubtful
55	7	maker-scaffold10x_908_pilon-snap-gene-0.99-mRNA-1 transcript=maker-scaffold10x_908_pilon-snap-gene-0.99-mRNA-1 gene=maker-scaffold10x_908_pilon-snap-gene-0.99				44.4639	90.67	9.59	499.73					Single Protein		maker-scaffold10x_908_pilon-snap-gene-0.99-mRNA-1 transcript=maker-scaffold10x_908_pilon-snap-gene-0.99-mRNA-1 gene=maker-scaffold10x_908_pilon-snap-gene-0.99	2	3	3	2	3	2	1	5	100	Doubtful
56	1	maker-scaffold10x_293_pilon-snap-gene-0.143-mRNA-1 transcript=maker-scaffold10x_293_pilon-snap-gene-0.143-mRNA-1 gene=maker-scaffold10x_293_pilon-snap-gene-0.143				38.681	80.63	19.94	2377.19			Deamidation of N (N98-{N96 N98}, N258-{N256 N258}), Deamidation of Q (Q90-{Q86 Q90}, Q250-{Q246 Q250})	Deamidation of N (2), Deamidation of Q (2)	Single Protein		maker-scaffold10x_293_pilon-snap-gene-0.143-mRNA-1 transcript=maker-scaffold10x_293_pilon-snap-gene-0.143-mRNA-1 gene=maker-scaffold10x_293_pilon-snap-gene-0.143	2	4	4	2	4	2	3	4	13.3333	Doubtful
56	3	maker-scaffold10x_1040_pilon-snap-gene-0.45-mRNA-1 transcript=maker-scaffold10x_1040_pilon-snap-gene-0.45-mRNA-1 gene=maker-scaffold10x_1040_pilon-snap-gene-0.45				292.898	71.98	0.41	0					Single Protein		maker-scaffold10x_1040_pilon-snap-gene-0.45-mRNA-1 transcript=maker-scaffold10x_1040_pilon-snap-gene-0.45-mRNA-1 gene=maker-scaffold10x_1040_pilon-snap-gene-0.45	1	1	1	1	1	1	0	1	13.3333	Doubtful
56	4	snap_masked-scaffold10x_416_pilon-processed-gene-0.61-mRNA-1 transcript=snap_masked-scaffold10x_416_pilon-processed-gene-0.61-mRNA-1 gene=snap_masked-scaffold10x_416_pilon-processed-gene-0.61				416.622	75.53	0.35	0			Deamidation of N (N179-{N176 N179})	Deamidation of N (1)	Single Protein		snap_masked-scaffold10x_416_pilon-processed-gene-0.61-mRNA-1 transcript=snap_masked-scaffold10x_416_pilon-processed-gene-0.61-mRNA-1 gene=snap_masked-scaffold10x_416_pilon-processed-gene-0.61	1	1	1	1	1	1	0	1	13.3333	Doubtful
57	1	maker-scaffold10x_445_pilon-augustus-gene-0.18-mRNA-1 transcript=maker-scaffold10x_445_pilon-augustus-gene-0.18-mRNA-1 gene=maker-scaffold10x_445_pilon-augustus-gene-0.18				37.1513	90.88	0	0					Single Protein		maker-scaffold10x_445_pilon-augustus-gene-0.18-mRNA-1 transcript=maker-scaffold10x_445_pilon-augustus-gene-0.18-mRNA-1 gene=maker-scaffold10x_445_pilon-augustus-gene-0.18	0	1	1	0	1	0	0	1	74.0741	Doubtful
57	2	maker-scaffold10x_819_pilon-augustus-gene-0.18-mRNA-1 transcript=maker-scaffold10x_819_pilon-augustus-gene-0.18-mRNA-1 gene=maker-scaffold10x_819_pilon-augustus-gene-0.18				28.8853	85.71	6.35	2937.76					Single Protein		maker-scaffold10x_819_pilon-augustus-gene-0.18-mRNA-1 transcript=maker-scaffold10x_819_pilon-augustus-gene-0.18-mRNA-1 gene=maker-scaffold10x_819_pilon-augustus-gene-0.18	1	1	1	1	1	1	1	1	90	Doubtful
57	5	maker-scaffold10x_265_pilon-snap-gene-0.26-mRNA-1 transcript=maker-scaffold10x_265_pilon-snap-gene-0.26-mRNA-1 gene=maker-scaffold10x_265_pilon-snap-gene-0.26				37.8465	100	2.34	0					Single Protein		maker-scaffold10x_265_pilon-snap-gene-0.26-mRNA-1 transcript=maker-scaffold10x_265_pilon-snap-gene-0.26-mRNA-1 gene=maker-scaffold10x_265_pilon-snap-gene-0.26	1	2	2	1	2	1	0	2	74.0741	Doubtful
57	8	maker-scaffold10x_660_pilon-snap-gene-0.5-mRNA-1 transcript=maker-scaffold10x_660_pilon-snap-gene-0.5-mRNA-1 gene=maker-scaffold10x_660_pilon-snap-gene-0.5				130.183	70.52	0	0					Single Protein		maker-scaffold10x_660_pilon-snap-gene-0.5-mRNA-1 transcript=maker-scaffold10x_660_pilon-snap-gene-0.5-mRNA-1 gene=maker-scaffold10x_660_pilon-snap-gene-0.5	0	2	2	0	2	0	0	2	74.0741	Doubtful
57	9	maker-scaffold10x_263_pilon-snap-gene-0.31-mRNA-1 transcript=maker-scaffold10x_263_pilon-snap-gene-0.31-mRNA-1 gene=maker-scaffold10x_263_pilon-snap-gene-0.31				501.84	85.98	0.3	0			Deamidation of N (N2005-{N1998 N2005})	Deamidation of N (1)	Single Protein		maker-scaffold10x_263_pilon-snap-gene-0.31-mRNA-1 transcript=maker-scaffold10x_263_pilon-snap-gene-0.31-mRNA-1 gene=maker-scaffold10x_263_pilon-snap-gene-0.31	1	1	1	1	1	1	0	1	90	Doubtful
57	10	maker-scaffold10x_1194_pilon-snap-gene-0.35-mRNA-1 transcript=maker-scaffold10x_1194_pilon-snap-gene-0.35-mRNA-1 gene=maker-scaffold10x_1194_pilon-snap-gene-0.35				47.4948	91.57	3.86	10019.3					Related Proteins	maker-scaffold10x_1194_pilon-snap-gene-0.52-mRNA-1 transcript=maker-scaffold10x_1194_pilon-snap-gene-0.52-mRNA-1 gene=maker-scaffold10x_1194_pilon-snap-gene-0.52	maker-scaffold10x_1194_pilon-snap-gene-0.35-mRNA-1 transcript=maker-scaffold10x_1194_pilon-snap-gene-0.35-mRNA-1 gene=maker-scaffold10x_1194_pilon-snap-gene-0.35, maker-scaffold10x_1194_pilon-snap-gene-0.52-mRNA-1 transcript=maker-scaffold10x_1194_pilon-snap-gene-0.52-mRNA-1 gene=maker-scaffold10x_1194_pilon-snap-gene-0.52	1	1	0	0	0	0	6	7	90	Doubtful
57	11	maker-scaffold10x_1194_pilon-snap-gene-0.52-mRNA-1 transcript=maker-scaffold10x_1194_pilon-snap-gene-0.52-mRNA-1 gene=maker-scaffold10x_1194_pilon-snap-gene-0.52				27.8961	72.22	5.95	3486.57					Related Proteins	maker-scaffold10x_685_pilon-snap-gene-0.26-mRNA-1 transcript=maker-scaffold10x_685_pilon-snap-gene-0.26-mRNA-1 gene=maker-scaffold10x_685_pilon-snap-gene-0.26	maker-scaffold10x_1194_pilon-snap-gene-0.52-mRNA-1 transcript=maker-scaffold10x_1194_pilon-snap-gene-0.52-mRNA-1 gene=maker-scaffold10x_1194_pilon-snap-gene-0.52, maker-scaffold10x_685_pilon-snap-gene-0.26-mRNA-1 transcript=maker-scaffold10x_685_pilon-snap-gene-0.26-mRNA-1 gene=maker-scaffold10x_685_pilon-snap-gene-0.26	1	1	0	0	0	0	1	1	90	Doubtful
57	12	maker-scaffold10x_561_pilon-snap-gene-0.17-mRNA-1 transcript=maker-scaffold10x_561_pilon-snap-gene-0.17-mRNA-1 gene=maker-scaffold10x_561_pilon-snap-gene-0.17				14.3444	100	14.06	0	Oxidation of M(M50)	Oxidation of M(1)			Single Protein		maker-scaffold10x_561_pilon-snap-gene-0.17-mRNA-1 transcript=maker-scaffold10x_561_pilon-snap-gene-0.17-mRNA-1 gene=maker-scaffold10x_561_pilon-snap-gene-0.17	1	1	1	1	1	1	0	1	90	Doubtful
10	3	maker-scaffold10x_303_pilon-snap-gene-0.30-mRNA-1 transcript=maker-scaffold10x_303_pilon-snap-gene-0.30-mRNA-1 gene=maker-scaffold10x_303_pilon-snap-gene-0.30				48.8558	64.4	22.68	2164.52					Single Protein		maker-scaffold10x_303_pilon-snap-gene-0.30-mRNA-1 transcript=maker-scaffold10x_303_pilon-snap-gene-0.30-mRNA-1 gene=maker-scaffold10x_303_pilon-snap-gene-0.30	8	10	10	8	10	8	9	12	100	Doubtful
10	6	maker-scaffold10x_205_pilon-snap-gene-0.60-mRNA-1 transcript=maker-scaffold10x_205_pilon-snap-gene-0.60-mRNA-1 gene=maker-scaffold10x_205_pilon-snap-gene-0.60				44.7333	50.38	10.03	2255.23					Single Protein		maker-scaffold10x_205_pilon-snap-gene-0.60-mRNA-1 transcript=maker-scaffold10x_205_pilon-snap-gene-0.60-mRNA-1 gene=maker-scaffold10x_205_pilon-snap-gene-0.60	4	4	4	4	4	4	4	4	100	Doubtful

## Sheet: Confidence >90%
Spot	Protein	Main Accession	MW [kDa]	Coverage [%]	Spectrum Counting	#Validated Peptides	#Validated Unique	Confidence [%]	Description	e-Value	GO IDs	GO Names	Enzyme Codes	Enzyme Names	InterPro IDs	InterPro GO IDs	InterPro GO Names
14	2	maker-scaffold10x_45_pilon-snap-gene-0.54-mRNA-1 transcript=maker-scaffold10x_45_pilon-snap-gene-0.54-mRNA-1 gene=maker-scaffold10x_45_pilon-snap-gene-0.54	38.0224	10.5	3803.57	3	3	100	Cathepsin B	0	F:GO:0008234	F:cysteine-type peptidase activity			IPR000668 (PRINTS); IPR000668 (SMART); G3DSA:3.90.70.10 (GENE3D); IPR000668 (PFAM); IPR012599 (PFAM); PTHR12411 (PANTHER); PTHR12411:SF606 (PANTHER); cd02620 (CDD); IPR038765 (SUPERFAMILY)	F:GO:0004197; P:GO:0006508; F:GO:0008234; P:GO:0050790	F:cysteine-type endopeptidase activity; P:proteolysis; F:cysteine-type peptidase activity; P:regulation of catalytic activity
16	4	maker-scaffold10x_693_pilon-augustus-gene-0.35-mRNA-1 transcript=maker-scaffold10x_693_pilon-augustus-gene-0.35-mRNA-1 gene=maker-scaffold10x_693_pilon-augustus-gene-0.35	75.1325	4.23	596.122	2	2	100	fimbrin, putative	0	F:GO:0051015; P:GO:0051017	F:actin filament binding; P:actin filament bundle assembly			IPR001715 (SMART); IPR001715 (PFAM); IPR036872 (G3DSA:1.10.418.GENE3D); IPR036872 (G3DSA:1.10.418.GENE3D); IPR036872 (G3DSA:1.10.418.GENE3D); IPR036872 (G3DSA:1.10.418.GENE3D); IPR039959 (PANTHER); PTHR19961:SF18 (PANTHER); IPR001715 (PROSITE_PROFILES); IPR001715 (PROSITE_PROFILES); IPR001715 (PROSITE_PROFILES); IPR001715 (PROSITE_PROFILES); IPR001715 (CDD); IPR036872 (SUPERFAMILY)	F:GO:0005515; F:GO:0051015; P:GO:0051017	F:protein binding; F:actin filament binding; P:actin filament bundle assembly
16	5	maker-scaffold10x_819_pilon-augustus-gene-0.18-mRNA-1 transcript=maker-scaffold10x_819_pilon-augustus-gene-0.18-mRNA-1 gene=maker-scaffold10x_819_pilon-augustus-gene-0.18	28.8853	34.13	10484	18	17	100	cathepsin L	8.42584e-97	P:GO:0006508; F:GO:0008234	P:proteolysis; F:cysteine-type peptidase activity			IPR000668 (SMART); IPR013201 (SMART); IPR000668 (PFAM); IPR013201 (PFAM); G3DSA:3.90.70.10 (GENE3D); PTHR12411 (PANTHER); PTHR12411 (PANTHER); PTHR12411:SF525 (PANTHER); IPR039417 (CDD); IPR038765 (SUPERFAMILY)	P:GO:0006508; F:GO:0008234	P:proteolysis; F:cysteine-type peptidase activity
16	11	maker-scaffold10x_1194_pilon-snap-gene-0.52-mRNA-1 transcript=maker-scaffold10x_1194_pilon-snap-gene-0.52-mRNA-1 gene=maker-scaffold10x_1194_pilon-snap-gene-0.52	27.8961	55.95	6135.62	20	4	100	cathepsin L	0	F:GO:0004197; C:GO:0005576; P:GO:0006508	F:cysteine-type endopeptidase activity; C:extracellular region; P:proteolysis	EC:3.4.22	Acting on peptide bonds (peptidases)	IPR000668 (PRINTS); IPR000668 (SMART); G3DSA:3.90.70.10 (GENE3D); IPR000668 (PFAM); PTHR12411 (PANTHER); PTHR12411:SF525 (PANTHER); IPR039417 (CDD); IPR038765 (SUPERFAMILY)	P:GO:0006508; F:GO:0008234	P:proteolysis; F:cysteine-type peptidase activity
16	13	maker-scaffold10x_1194_pilon-snap-gene-0.35-mRNA-1 transcript=maker-scaffold10x_1194_pilon-snap-gene-0.35-mRNA-1 gene=maker-scaffold10x_1194_pilon-snap-gene-0.35	47.4948	32.05	4131	19	2	100	cathepsin L	0	F:GO:0004197; C:GO:0005576; P:GO:0006508	F:cysteine-type endopeptidase activity; C:extracellular region; P:proteolysis	EC:3.4.22	Acting on peptide bonds (peptidases)	IPR000668 (PRINTS); IPR013201 (SMART); IPR000668 (SMART); G3DSA:3.90.70.10 (GENE3D); IPR000668 (PFAM); IPR013201 (PFAM); PTHR12411 (PANTHER); PTHR12411 (PANTHER); PTHR12411:SF525 (PANTHER); IPR039417 (CDD); IPR038765 (SUPERFAMILY); IPR038765 (SUPERFAMILY); IPR038765 (SUPERFAMILY)	P:GO:0006508; F:GO:0008234	P:proteolysis; F:cysteine-type peptidase activity
16	18	maker-scaffold10x_147_pilon-snap-gene-0.16-mRNA-1 transcript=maker-scaffold10x_147_pilon-snap-gene-0.16-mRNA-1 gene=maker-scaffold10x_147_pilon-snap-gene-0.16	45.3912	13.78	3489.33	5	3	100	cathepsin L	0	F:GO:0004197; C:GO:0005576; P:GO:0006508	F:cysteine-type endopeptidase activity; C:extracellular region; P:proteolysis	EC:3.4.22	Acting on peptide bonds (peptidases)	IPR000668 (PRINTS); IPR000668 (SMART); IPR013201 (SMART); G3DSA:3.90.70.10 (GENE3D); IPR000668 (PFAM); IPR013201 (PFAM); PTHR12411:SF525 (PANTHER); PTHR12411 (PANTHER); IPR039417 (CDD); IPR038765 (SUPERFAMILY); IPR038765 (SUPERFAMILY)	P:GO:0006508; F:GO:0008234	P:proteolysis; F:cysteine-type peptidase activity
19	4	maker-scaffold10x_1194_pilon-snap-gene-0.52-mRNA-1 transcript=maker-scaffold10x_1194_pilon-snap-gene-0.52-mRNA-1 gene=maker-scaffold10x_1194_pilon-snap-gene-0.52	27.8961	56.75	14849.1	24	8	100	cathepsin L	0	F:GO:0004197; C:GO:0005576; P:GO:0006508	F:cysteine-type endopeptidase activity; C:extracellular region; P:proteolysis	EC:3.4.22	Acting on peptide bonds (peptidases)	IPR000668 (PRINTS); IPR000668 (SMART); G3DSA:3.90.70.10 (GENE3D); IPR000668 (PFAM); PTHR12411 (PANTHER); PTHR12411:SF525 (PANTHER); IPR039417 (CDD); IPR038765 (SUPERFAMILY)	P:GO:0006508; F:GO:0008234	P:proteolysis; F:cysteine-type peptidase activity
19	5	maker-scaffold10x_685_pilon-snap-gene-0.26-mRNA-1 transcript=maker-scaffold10x_685_pilon-snap-gene-0.26-mRNA-1 gene=maker-scaffold10x_685_pilon-snap-gene-0.26	36.9567	33.13	4432.17	11	4	100	cathepsin L	0	F:GO:0004197; C:GO:0005576; P:GO:0006508	F:cysteine-type endopeptidase activity; C:extracellular region; P:proteolysis	EC:3.4.22	Acting on peptide bonds (peptidases)	IPR000668 (PRINTS); IPR013201 (SMART); IPR000668 (SMART); IPR000668 (PFAM); G3DSA:3.90.70.10 (GENE3D); IPR013201 (PFAM); PTHR12411:SF525 (PANTHER); PTHR12411 (PANTHER); IPR039417 (CDD); IPR038765 (SUPERFAMILY)	P:GO:0006508; F:GO:0008234	P:proteolysis; F:cysteine-type peptidase activity
19	6	maker-scaffold10x_1194_pilon-snap-gene-0.35-mRNA-1 transcript=maker-scaffold10x_1194_pilon-snap-gene-0.35-mRNA-1 gene=maker-scaffold10x_1194_pilon-snap-gene-0.35	47.4948	33.73	7527.96	19	2	100	cathepsin L	0	F:GO:0004197; C:GO:0005576; P:GO:0006508	F:cysteine-type endopeptidase activity; C:extracellular region; P:proteolysis	EC:3.4.22	Acting on peptide bonds (peptidases)	IPR000668 (PRINTS); IPR013201 (SMART); IPR000668 (SMART); G3DSA:3.90.70.10 (GENE3D); IPR000668 (PFAM); IPR013201 (PFAM); PTHR12411 (PANTHER); PTHR12411 (PANTHER); PTHR12411:SF525 (PANTHER); IPR039417 (CDD); IPR038765 (SUPERFAMILY); IPR038765 (SUPERFAMILY); IPR038765 (SUPERFAMILY)	P:GO:0006508; F:GO:0008234	P:proteolysis; F:cysteine-type peptidase activity
19	11	maker-scaffold10x_147_pilon-snap-gene-0.16-mRNA-1 transcript=maker-scaffold10x_147_pilon-snap-gene-0.16-mRNA-1 gene=maker-scaffold10x_147_pilon-snap-gene-0.16	45.3912	18.8	2404.91	4	3	100	cathepsin L	0	F:GO:0004197; C:GO:0005576; P:GO:0006508	F:cysteine-type endopeptidase activity; C:extracellular region; P:proteolysis	EC:3.4.22	Acting on peptide bonds (peptidases)	IPR000668 (PRINTS); IPR000668 (SMART); IPR013201 (SMART); G3DSA:3.90.70.10 (GENE3D); IPR000668 (PFAM); IPR013201 (PFAM); PTHR12411:SF525 (PANTHER); PTHR12411 (PANTHER); IPR039417 (CDD); IPR038765 (SUPERFAMILY); IPR038765 (SUPERFAMILY)	P:GO:0006508; F:GO:0008234	P:proteolysis; F:cysteine-type peptidase activity
23	4	maker-scaffold10x_819_pilon-augustus-gene-0.18-mRNA-1 transcript=maker-scaffold10x_819_pilon-augustus-gene-0.18-mRNA-1 gene=maker-scaffold10x_819_pilon-augustus-gene-0.18	28.8853	16.27	2226.72	7	5	100	cathepsin L	8.42584e-97	P:GO:0006508; F:GO:0008234	P:proteolysis; F:cysteine-type peptidase activity			IPR000668 (SMART); IPR013201 (SMART); IPR000668 (PFAM); IPR013201 (PFAM); G3DSA:3.90.70.10 (GENE3D); PTHR12411 (PANTHER); PTHR12411 (PANTHER); PTHR12411:SF525 (PANTHER); IPR039417 (CDD); IPR038765 (SUPERFAMILY)	P:GO:0006508; F:GO:0008234	P:proteolysis; F:cysteine-type peptidase activity
23	5	maker-scaffold10x_2740_pilon-augustus-gene-0.1-mRNA-1 transcript=maker-scaffold10x_2740_pilon-augustus-gene-0.1-mRNA-1 gene=maker-scaffold10x_2740_pilon-augustus-gene-0.1	23.0584	12.5	3668.4	6	4	100	cathepsin L	6.67e-102	F:GO:0004197; C:GO:0005576; P:GO:0006508	F:cysteine-type endopeptidase activity; C:extracellular region; P:proteolysis	EC:3.4.22	Acting on peptide bonds (peptidases)	IPR013201 (SMART); IPR013201 (PFAM); G3DSA:3.90.70.10 (GENE3D); PTHR12411 (PANTHER); PTHR12411:SF525 (PANTHER); IPR038765 (SUPERFAMILY)	no GO terms	no GO terms
23	14	maker-scaffold10x_1194_pilon-snap-gene-0.52-mRNA-1 transcript=maker-scaffold10x_1194_pilon-snap-gene-0.52-mRNA-1 gene=maker-scaffold10x_1194_pilon-snap-gene-0.52	27.8961	46.43	3496.37	19	5	100	cathepsin L	0	F:GO:0004197; C:GO:0005576; P:GO:0006508	F:cysteine-type endopeptidase activity; C:extracellular region; P:proteolysis	EC:3.4.22	Acting on peptide bonds (peptidases)	IPR000668 (PRINTS); IPR000668 (SMART); G3DSA:3.90.70.10 (GENE3D); IPR000668 (PFAM); PTHR12411 (PANTHER); PTHR12411:SF525 (PANTHER); IPR039417 (CDD); IPR038765 (SUPERFAMILY)	P:GO:0006508; F:GO:0008234	P:proteolysis; F:cysteine-type peptidase activity
23	15	maker-scaffold10x_685_pilon-snap-gene-0.26-mRNA-1 transcript=maker-scaffold10x_685_pilon-snap-gene-0.26-mRNA-1 gene=maker-scaffold10x_685_pilon-snap-gene-0.26	36.9567	19.33	1966.34	12	3	100	cathepsin L	0	F:GO:0004197; C:GO:0005576; P:GO:0006508	F:cysteine-type endopeptidase activity; C:extracellular region; P:proteolysis	EC:3.4.22	Acting on peptide bonds (peptidases)	IPR000668 (PRINTS); IPR013201 (SMART); IPR000668 (SMART); IPR000668 (PFAM); G3DSA:3.90.70.10 (GENE3D); IPR013201 (PFAM); PTHR12411:SF525 (PANTHER); PTHR12411 (PANTHER); IPR039417 (CDD); IPR038765 (SUPERFAMILY)	P:GO:0006508; F:GO:0008234	P:proteolysis; F:cysteine-type peptidase activity
23	19	maker-scaffold10x_439_pilon-augustus-gene-0.21-mRNA-1 transcript=maker-scaffold10x_439_pilon-augustus-gene-0.21-mRNA-1 gene=maker-scaffold10x_439_pilon-augustus-gene-0.21	27.2487	16.05	2685.58	5	5	100	Thioredoxin peroxidase	5.1927e-175	F:GO:0004601; C:GO:0005623; P:GO:0045454; F:GO:0051920; P:GO:0055114; P:GO:0098869	F:peroxidase activity; C:cell; P:cell redox homeostasis; F:peroxiredoxin activity; P:oxidation-reduction process; P:cellular oxidant detoxification	EC:1.11.1.15; EC:1.11.1.7	Peroxiredoxin; Peroxidase	IPR024706 (PIRSF); G3DSA:3.40.30.10 (GENE3D); IPR019479 (PFAM); IPR000866 (PFAM); PTHR10681 (PANTHER); PTHR10681:SF154 (PANTHER); IPR013766 (PROSITE_PROFILES); cd03015 (CDD); IPR036249 (SUPERFAMILY)	F:GO:0016209; F:GO:0016491; P:GO:0045454; F:GO:0051920; P:GO:0055114	F:antioxidant activity; F:oxidoreductase activity; P:cell redox homeostasis; F:peroxiredoxin activity; P:oxidation-reduction process
23	23	maker-scaffold10x_147_pilon-snap-gene-0.16-mRNA-1 transcript=maker-scaffold10x_147_pilon-snap-gene-0.16-mRNA-1 gene=maker-scaffold10x_147_pilon-snap-gene-0.16	45.3912	9.27	971.3	5	3	100	cathepsin L	0	F:GO:0004197; C:GO:0005576; P:GO:0006508	F:cysteine-type endopeptidase activity; C:extracellular region; P:proteolysis	EC:3.4.22	Acting on peptide bonds (peptidases)	IPR000668 (PRINTS); IPR000668 (SMART); IPR013201 (SMART); G3DSA:3.90.70.10 (GENE3D); IPR000668 (PFAM); IPR013201 (PFAM); PTHR12411:SF525 (PANTHER); PTHR12411 (PANTHER); IPR039417 (CDD); IPR038765 (SUPERFAMILY); IPR038765 (SUPERFAMILY)	P:GO:0006508; F:GO:0008234	P:proteolysis; F:cysteine-type peptidase activity
23	24	maker-scaffold10x_2740_pilon-augustus-gene-0.0-mRNA-1 transcript=maker-scaffold10x_2740_pilon-augustus-gene-0.0-mRNA-1 gene=maker-scaffold10x_2740_pilon-augustus-gene-0.0	42.1067	17.17	1546.75	10	2	100	cathepsin L	1.72469e-167	F:GO:0004197; C:GO:0005576; P:GO:0006508	F:cysteine-type endopeptidase activity; C:extracellular region; P:proteolysis	EC:3.4.22	Acting on peptide bonds (peptidases)	IPR013201 (SMART); IPR000668 (SMART); IPR000668 (PFAM); G3DSA:3.90.70.10 (GENE3D); IPR013201 (PFAM); PTHR12411 (PANTHER); PTHR12411:SF525 (PANTHER); PTHR12411:SF525 (PANTHER); PTHR12411 (PANTHER); PTHR12411 (PANTHER); PTHR12411:SF525 (PANTHER); IPR039417 (CDD); IPR038765 (SUPERFAMILY); IPR038765 (SUPERFAMILY)	P:GO:0006508; F:GO:0008234	P:proteolysis; F:cysteine-type peptidase activity
24	6	maker-scaffold10x_2740_pilon-augustus-gene-0.1-mRNA-1 transcript=maker-scaffold10x_2740_pilon-augustus-gene-0.1-mRNA-1 gene=maker-scaffold10x_2740_pilon-augustus-gene-0.1	23.0584	12.5	3591.95	2	2	100	cathepsin L	6.67e-102	F:GO:0004197; C:GO:0005576; P:GO:0006508	F:cysteine-type endopeptidase activity; C:extracellular region; P:proteolysis	EC:3.4.22	Acting on peptide bonds (peptidases)	IPR013201 (SMART); IPR013201 (PFAM); G3DSA:3.90.70.10 (GENE3D); PTHR12411 (PANTHER); PTHR12411:SF525 (PANTHER); IPR038765 (SUPERFAMILY)	no GO terms	no GO terms
24	14	maker-scaffold10x_1013_pilon-snap-gene-0.133-mRNA-1 transcript=maker-scaffold10x_1013_pilon-snap-gene-0.133-mRNA-1 gene=maker-scaffold10x_1013_pilon-snap-gene-0.133	16.8109	19.46	3848.52	2	2	100	calmodulin	6.48707e-102	P:GO:0000086; C:GO:0000922; P:GO:0002027; F:GO:0005509; C:GO:0005634; C:GO:0005813; C:GO:0005829; C:GO:0008076; F:GO:0008179; P:GO:0010800; F:GO:0010856; P:GO:0010881; F:GO:0016301; F:GO:0019855; F:GO:0019901; C:GO:0030017; F:GO:0030235; C:GO:0030426; F:GO:0031432; C:GO:0031966; F:GO:0031997; P:GO:0032465; P:GO:0032516; C:GO:0043209; P:GO:0043388; F:GO:0043539; F:GO:0043548; F:GO:0044325; P:GO:00…	P:G2/M transition of mitotic cell cycle; C:spindle pole; P:regulation of heart rate; F:calcium ion binding; C:nucleus; C:centrosome; C:cytosol; C:voltage-gated potassium channel complex; F:adenylate cyclase binding; P:positive regulation of peptidyl-threonine phosphorylation; F:adenylate cyclase activator activity; P:regulation of cardiac muscle contraction by regulation of the release of sequest…			IPR002048 (SMART); G3DSA:1.10.238.10 (GENE3D); G3DSA:1.10.238.10 (GENE3D); G3DSA:1.10.238.10 (GENE3D); IPR002048 (PFAM); IPR039030 (PTHR23050:PANTHER); PTHR23050 (PANTHER); IPR002048 (PROSITE_PROFILES); IPR002048 (PROSITE_PROFILES); IPR002048 (PROSITE_PROFILES); IPR002048 (PROSITE_PROFILES); IPR002048 (CDD); IPR002048 (CDD); IPR011992 (SUPERFAMILY)	F:GO:0005509; P:GO:0019722	F:calcium ion binding; P:calcium-mediated signaling
24	18	maker-scaffold10x_439_pilon-augustus-gene-0.21-mRNA-1 transcript=maker-scaffold10x_439_pilon-augustus-gene-0.21-mRNA-1 gene=maker-scaffold10x_439_pilon-augustus-gene-0.21	27.2487	11.52	3724.98	3	3	100	Thioredoxin peroxidase	5.1927e-175	F:GO:0004601; C:GO:0005623; P:GO:0045454; F:GO:0051920; P:GO:0055114; P:GO:0098869	F:peroxidase activity; C:cell; P:cell redox homeostasis; F:peroxiredoxin activity; P:oxidation-reduction process; P:cellular oxidant detoxification	EC:1.11.1.15; EC:1.11.1.7	Peroxiredoxin; Peroxidase	IPR024706 (PIRSF); G3DSA:3.40.30.10 (GENE3D); IPR019479 (PFAM); IPR000866 (PFAM); PTHR10681 (PANTHER); PTHR10681:SF154 (PANTHER); IPR013766 (PROSITE_PROFILES); cd03015 (CDD); IPR036249 (SUPERFAMILY)	F:GO:0016209; F:GO:0016491; P:GO:0045454; F:GO:0051920; P:GO:0055114	F:antioxidant activity; F:oxidoreductase activity; P:cell redox homeostasis; F:peroxiredoxin activity; P:oxidation-reduction process
25	3	maker-scaffold10x_490_pilon-snap-gene-0.8-mRNA-1 transcript=maker-scaffold10x_490_pilon-snap-gene-0.8-mRNA-1 gene=maker-scaffold10x_490_pilon-snap-gene-0.8	36.7394	36.19	1083.99	13	6	100	glutathione S-transferase	1.51916e-117	F:GO:0004364; C:GO:0005737	F:glutathione transferase activity; C:cytoplasm	EC:2.5.1.18	Glutathione transferase	G3DSA:3.40.30.10 (GENE3D); IPR004046 (PFAM); IPR004045 (PFAM); G3DSA:1.20.1050.130 (GENE3D); G3DSA:1.20.1050.10 (GENE3D),SFLDG01205 (SFLD),SFLDG00363 (SFLD); PTHR11571:SF137 (PANTHER); PTHR11571 (PANTHER); PTHR11571:SF137 (PANTHER); PTHR11571 (PANTHER); IPR010987 (PROSITE_PROFILES); IPR004045 (PROSITE_PROFILES); IPR010987 (PROSITE_PROFILES); cd03209 (CDD); IPR036282 (SUPERFAMILY); IPR036282 (SUPE…	F:GO:0005515	F:protein binding
25	11	maker-scaffold10x_1184_pilon-snap-gene-0.31-mRNA-1 transcript=maker-scaffold10x_1184_pilon-snap-gene-0.31-mRNA-1 gene=maker-scaffold10x_1184_pilon-snap-gene-0.31	51.1535	29.89	594.138	9	2	100	glutathione S-transferase	4.20756e-108	F:GO:0004364; C:GO:0005737	F:glutathione transferase activity; C:cytoplasm	EC:2.5.1.18	Glutathione transferase	G3DSA:1.20.1050.10 (GENE3D); IPR004045 (PFAM); G3DSA:3.40.30.10 (GENE3D); G3DSA:1.20.1050.130 (GENE3D); IPR004046 (PFAM); IPR040079 (PTHR11571:PANTHER); PTHR11571 (PANTHER); PTHR11571:SF137 (PANTHER); PTHR11571 (PANTHER); PTHR11571:SF137 (PANTHER); IPR004045 (PROSITE_PROFILES); IPR010987 (PROSITE_PROFILES); IPR010987 (PROSITE_PROFILES); IPR004045 (PROSITE_PROFILES); IPR010987 (PROSITE_PROFILES); …	F:GO:0005515	F:protein binding
25	18	maker-scaffold10x_439_pilon-augustus-gene-0.21-mRNA-1 transcript=maker-scaffold10x_439_pilon-augustus-gene-0.21-mRNA-1 gene=maker-scaffold10x_439_pilon-augustus-gene-0.21	27.2487	13.58	4272.95	3	3	100	Thioredoxin peroxidase	5.1927e-175	F:GO:0004601; C:GO:0005623; P:GO:0045454; F:GO:0051920; P:GO:0055114; P:GO:0098869	F:peroxidase activity; C:cell; P:cell redox homeostasis; F:peroxiredoxin activity; P:oxidation-reduction process; P:cellular oxidant detoxification	EC:1.11.1.15; EC:1.11.1.7	Peroxiredoxin; Peroxidase	IPR024706 (PIRSF); G3DSA:3.40.30.10 (GENE3D); IPR019479 (PFAM); IPR000866 (PFAM); PTHR10681 (PANTHER); PTHR10681:SF154 (PANTHER); IPR013766 (PROSITE_PROFILES); cd03015 (CDD); IPR036249 (SUPERFAMILY)	F:GO:0016209; F:GO:0016491; P:GO:0045454; F:GO:0051920; P:GO:0055114	F:antioxidant activity; F:oxidoreductase activity; P:cell redox homeostasis; F:peroxiredoxin activity; P:oxidation-reduction process
26	1	maker-scaffold10x_1184_pilon-snap-gene-0.31-mRNA-1 transcript=maker-scaffold10x_1184_pilon-snap-gene-0.31-mRNA-1 gene=maker-scaffold10x_1184_pilon-snap-gene-0.31	51.1535	20.9	391.348	3	3	100	glutathione S-transferase	4.20756e-108	F:GO:0004364; C:GO:0005737	F:glutathione transferase activity; C:cytoplasm	EC:2.5.1.18	Glutathione transferase	G3DSA:1.20.1050.10 (GENE3D); IPR004045 (PFAM); G3DSA:3.40.30.10 (GENE3D); G3DSA:1.20.1050.130 (GENE3D); IPR004046 (PFAM); IPR040079 (PTHR11571:PANTHER); PTHR11571 (PANTHER); PTHR11571:SF137 (PANTHER); PTHR11571 (PANTHER); PTHR11571:SF137 (PANTHER); IPR004045 (PROSITE_PROFILES); IPR010987 (PROSITE_PROFILES); IPR010987 (PROSITE_PROFILES); IPR004045 (PROSITE_PROFILES); IPR010987 (PROSITE_PROFILES); …	F:GO:0005515	F:protein binding
26	10	maker-scaffold10x_439_pilon-augustus-gene-0.21-mRNA-1 transcript=maker-scaffold10x_439_pilon-augustus-gene-0.21-mRNA-1 gene=maker-scaffold10x_439_pilon-augustus-gene-0.21	27.2487	22.63	4475.9	6	6	100	Thioredoxin peroxidase	5.1927e-175	F:GO:0004601; C:GO:0005623; P:GO:0045454; F:GO:0051920; P:GO:0055114; P:GO:0098869	F:peroxidase activity; C:cell; P:cell redox homeostasis; F:peroxiredoxin activity; P:oxidation-reduction process; P:cellular oxidant detoxification	EC:1.11.1.15; EC:1.11.1.7	Peroxiredoxin; Peroxidase	IPR024706 (PIRSF); G3DSA:3.40.30.10 (GENE3D); IPR019479 (PFAM); IPR000866 (PFAM); PTHR10681 (PANTHER); PTHR10681:SF154 (PANTHER); IPR013766 (PROSITE_PROFILES); cd03015 (CDD); IPR036249 (SUPERFAMILY)	F:GO:0016209; F:GO:0016491; P:GO:0045454; F:GO:0051920; P:GO:0055114	F:antioxidant activity; F:oxidoreductase activity; P:cell redox homeostasis; F:peroxiredoxin activity; P:oxidation-reduction process
26	13	maker-scaffold10x_718_pilon-snap-gene-0.9-mRNA-1 transcript=maker-scaffold10x_718_pilon-snap-gene-0.9-mRNA-1 gene=maker-scaffold10x_718_pilon-snap-gene-0.9	25.9683	27.66	4483.95	6	6	100	Proteasome subunit alpha type-2	2.81367e-153	F:GO:0004298; C:GO:0005634; C:GO:0005737; P:GO:0006511; C:GO:0019773	F:threonine-type endopeptidase activity; C:nucleus; C:cytoplasm; P:ubiquitin-dependent protein catabolic process; C:proteasome core complex, alpha-subunit complex	EC:3.4.25	Acting on peptide bonds (peptidases)	IPR000426 (SMART); IPR000426 (PFAM); IPR001353 (PFAM); IPR029055 (G3DSA:3.60.20.GENE3D); IPR034644 (PTHR11599:PANTHER); PTHR11599 (PANTHER); IPR023332 (PROSITE_PROFILES); cd03750 (CDD); IPR029055 (SUPERFAMILY)	F:GO:0004175; F:GO:0004298; C:GO:0005839; P:GO:0006511; C:GO:0019773; P:GO:0051603	F:endopeptidase activity; F:threonine-type endopeptidase activity; C:proteasome core complex; P:ubiquitin-dependent protein catabolic process; C:proteasome core complex, alpha-subunit complex; P:proteolysis involved in cellular protein catabolic process
27	12	maker-scaffold10x_439_pilon-augustus-gene-0.21-mRNA-1 transcript=maker-scaffold10x_439_pilon-augustus-gene-0.21-mRNA-1 gene=maker-scaffold10x_439_pilon-augustus-gene-0.21	27.2487	39.92	6496.49	13	13	100	Thioredoxin peroxidase	5.1927e-175	F:GO:0004601; C:GO:0005623; P:GO:0045454; F:GO:0051920; P:GO:0055114; P:GO:0098869	F:peroxidase activity; C:cell; P:cell redox homeostasis; F:peroxiredoxin activity; P:oxidation-reduction process; P:cellular oxidant detoxification	EC:1.11.1.15; EC:1.11.1.7	Peroxiredoxin; Peroxidase	IPR024706 (PIRSF); G3DSA:3.40.30.10 (GENE3D); IPR019479 (PFAM); IPR000866 (PFAM); PTHR10681 (PANTHER); PTHR10681:SF154 (PANTHER); IPR013766 (PROSITE_PROFILES); cd03015 (CDD); IPR036249 (SUPERFAMILY)	F:GO:0016209; F:GO:0016491; P:GO:0045454; F:GO:0051920; P:GO:0055114	F:antioxidant activity; F:oxidoreductase activity; P:cell redox homeostasis; F:peroxiredoxin activity; P:oxidation-reduction process
28	9	maker-scaffold10x_2740_pilon-augustus-gene-0.1-mRNA-1 transcript=maker-scaffold10x_2740_pilon-augustus-gene-0.1-mRNA-1 gene=maker-scaffold10x_2740_pilon-augustus-gene-0.1	23.0584	12.5	1669.64	2	2	100	cathepsin L	6.67e-102	F:GO:0004197; C:GO:0005576; P:GO:0006508	F:cysteine-type endopeptidase activity; C:extracellular region; P:proteolysis	EC:3.4.22	Acting on peptide bonds (peptidases)	IPR013201 (SMART); IPR013201 (PFAM); G3DSA:3.90.70.10 (GENE3D); PTHR12411 (PANTHER); PTHR12411:SF525 (PANTHER); IPR038765 (SUPERFAMILY)	no GO terms	no GO terms
28	10	maker-scaffold10x_439_pilon-augustus-gene-0.21-mRNA-1 transcript=maker-scaffold10x_439_pilon-augustus-gene-0.21-mRNA-1 gene=maker-scaffold10x_439_pilon-augustus-gene-0.21	27.2487	16.46	3091.93	4	4	100	Thioredoxin peroxidase	5.1927e-175	F:GO:0004601; C:GO:0005623; P:GO:0045454; F:GO:0051920; P:GO:0055114; P:GO:0098869	F:peroxidase activity; C:cell; P:cell redox homeostasis; F:peroxiredoxin activity; P:oxidation-reduction process; P:cellular oxidant detoxification	EC:1.11.1.15; EC:1.11.1.7	Peroxiredoxin; Peroxidase	IPR024706 (PIRSF); G3DSA:3.40.30.10 (GENE3D); IPR019479 (PFAM); IPR000866 (PFAM); PTHR10681 (PANTHER); PTHR10681:SF154 (PANTHER); IPR013766 (PROSITE_PROFILES); cd03015 (CDD); IPR036249 (SUPERFAMILY)	F:GO:0016209; F:GO:0016491; P:GO:0045454; F:GO:0051920; P:GO:0055114	F:antioxidant activity; F:oxidoreductase activity; P:cell redox homeostasis; F:peroxiredoxin activity; P:oxidation-reduction process
33	5	maker-scaffold10x_377_pilon-snap-gene-0.46-mRNA-1 transcript=maker-scaffold10x_377_pilon-snap-gene-0.46-mRNA-1 gene=maker-scaffold10x_377_pilon-snap-gene-0.46	24.8098	7.96	6222.57	3	3	100	Zinc finger, C2H2-type domain-containing protein	9.99634e-48	C:GO:0005764; P:GO:0006629; P:GO:0006665	C:lysosome; P:lipid metabolic process; P:sphingolipid metabolic process			IPR008139 (SMART); G3DSA:1.10.225.10 (GENE3D); PTHR11480 (PANTHER); IPR008139 (PROSITE_PROFILES); IPR008139 (PROSITE_PROFILES); IPR011001 (SUPERFAMILY); IPR011001 (SUPERFAMILY)	no GO terms	no GO terms
35	7	maker-scaffold10x_265_pilon-snap-gene-0.26-mRNA-1 transcript=maker-scaffold10x_265_pilon-snap-gene-0.26-mRNA-1 gene=maker-scaffold10x_265_pilon-snap-gene-0.26	37.8465	10.82	2412.09	4	4	100	Epididymal secretory protein E1 precursor (Niemann Pick type C2 protein homolog)	1.28313e-73	C:GO:0005623; P:GO:0032367	C:cell; P:intracellular cholesterol transport			IPR003172 (SMART); IPR003172 (PFAM); G3DSA:2.60.40.770 (GENE3D); G3DSA:2.60.40.770 (GENE3D); PTHR11306:SF30 (PANTHER); IPR039670 (PANTHER); IPR033916 (CDD); IPR014756 (SUPERFAMILY); IPR014756 (SUPERFAMILY); IPR014756 (SUPERFAMILY)	P:GO:0032367	P:intracellular cholesterol transport
44	1	maker-scaffold10x_783_pilon-augustus-gene-0.27-mRNA-1 transcript=maker-scaffold10x_783_pilon-augustus-gene-0.27-mRNA-1 gene=maker-scaffold10x_783_pilon-augustus-gene-0.27	19.4168	21.05	10301.8	3	3	100	putative ferritin	1.18498e-122	F:GO:0004322; C:GO:0005623; P:GO:0006826; P:GO:0006879; F:GO:0008199; P:GO:0055114	F:ferroxidase activity; C:cell; P:iron ion transport; P:cellular iron ion homeostasis; F:ferric iron binding; P:oxidation-reduction process	EC:1.16.3.1; EC:1.16.3	Ferroxidase; Oxidizing metal ions	IPR012347 (G3DSA:1.20.1260.GENE3D); IPR008331 (PFAM); IPR001519 (PANTHER); IPR009040 (PROSITE_PROFILES); cd01056 (CDD); IPR009078 (SUPERFAMILY)	P:GO:0006826; P:GO:0006879; F:GO:0008199	P:iron ion transport; P:cellular iron ion homeostasis; F:ferric iron binding
44	4	maker-scaffold10x_265_pilon-snap-gene-0.26-mRNA-1 transcript=maker-scaffold10x_265_pilon-snap-gene-0.26-mRNA-1 gene=maker-scaffold10x_265_pilon-snap-gene-0.26	37.8465	7.89	3283.34	3	3	92.3077	Epididymal secretory protein E1 precursor (Niemann Pick type C2 protein homolog)	1.28313e-73	C:GO:0005623; P:GO:0032367	C:cell; P:intracellular cholesterol transport			IPR003172 (SMART); IPR003172 (PFAM); G3DSA:2.60.40.770 (GENE3D); G3DSA:2.60.40.770 (GENE3D); PTHR11306:SF30 (PANTHER); IPR039670 (PANTHER); IPR033916 (CDD); IPR014756 (SUPERFAMILY); IPR014756 (SUPERFAMILY); IPR014756 (SUPERFAMILY)	P:GO:0032367	P:intracellular cholesterol transport
47	7	maker-scaffold10x_61_pilon-snap-gene-0.36-mRNA-1 transcript=maker-scaffold10x_61_pilon-snap-gene-0.36-mRNA-1 gene=maker-scaffold10x_61_pilon-snap-gene-0.36	15.8157	33.77	43938.3	7	7	100	Superoxide dismutase [Cu-Zn]	1.99615e-106	F:GO:0004784; C:GO:0005737; P:GO:0019430; F:GO:0046872; P:GO:0055114	F:superoxide dismutase activity; C:cytoplasm; P:removal of superoxide radicals; F:metal ion binding; P:oxidation-reduction process	EC:1.15.1.1	Superoxide dismutase	IPR001424 (PRINTS); IPR001424 (PFAM); IPR036423 (G3DSA:2.60.40.GENE3D); PTHR10003:SF71 (PANTHER); IPR024134 (PANTHER); IPR001424 (CDD); IPR036423 (SUPERFAMILY)	P:GO:0006801; F:GO:0046872	P:superoxide metabolic process; F:metal ion binding
55	7	maker-scaffold10x_908_pilon-snap-gene-0.99-mRNA-1 transcript=maker-scaffold10x_908_pilon-snap-gene-0.99-mRNA-1 gene=maker-scaffold10x_908_pilon-snap-gene-0.99	44.4639	9.59	499.73	2	2	100	Globin-3	1.18338e-97	F:GO:0005488	F:binding			IPR012292 (G3DSA:1.10.490.GENE3D); IPR000971 (PFAM); PTHR46458 (PANTHER); cd01040 (CDD); cd01040 (CDD); cd01040 (CDD); IPR009050 (SUPERFAMILY); IPR009050 (SUPERFAMILY); IPR009050 (SUPERFAMILY)	F:GO:0019825; F:GO:0020037	F:oxygen binding; F:heme binding
10	3	maker-scaffold10x_303_pilon-snap-gene-0.30-mRNA-1 transcript=maker-scaffold10x_303_pilon-snap-gene-0.30-mRNA-1 gene=maker-scaffold10x_303_pilon-snap-gene-0.30	48.8558	22.68	2164.52	8	8	100	AChain A, Thioredoxin Glutathione Reductase	0	F:GO:0004791; C:GO:0005623; F:GO:0009055; F:GO:0015035; P:GO:0022900; P:GO:0045454; F:GO:0050660; P:GO:0098869	F:thioredoxin-disulfide reductase activity; C:cell; F:electron transfer activity; F:protein disulfide oxidoreductase activity; P:electron transport chain; P:cell redox homeostasis; F:flavin adenine dinucleotide binding; P:cellular oxidant detoxification	EC:1.8.1.9	Thioredoxin-disulfide reductase	PR00411 (PRINTS); PR00368 (PRINTS); IPR023753 (PFAM); IPR036188 (G3DSA:3.50.50.GENE3D); IPR004099 (PFAM); IPR002109 (PFAM); G3DSA:3.40.30.10 (GENE3D); IPR011899 (TIGRFAM); PTHR43256:SF7 (PANTHER); PTHR43256 (PANTHER); PTHR43256:SF7 (PANTHER); PTHR43256 (PANTHER); IPR002109 (PROSITE_PROFILES); cd03419 (CDD); IPR036188 (SUPERFAMILY); IPR016156 (SUPERFAMILY); IPR036249 (SUPERFAMILY)	F:GO:0009055; F:GO:0015035; F:GO:0016491; P:GO:0045454; F:GO:0050660; P:GO:0055114	F:electron transfer activity; F:protein disulfide oxidoreductase activity; F:oxidoreductase activity; P:cell redox homeostasis; F:flavin adenine dinucleotide binding; P:oxidation-reduction process
10	6	maker-scaffold10x_205_pilon-snap-gene-0.60-mRNA-1 transcript=maker-scaffold10x_205_pilon-snap-gene-0.60-mRNA-1 gene=maker-scaffold10x_205_pilon-snap-gene-0.60	44.7333	10.03	2255.23	4	4	100	Lysosomal Pro-X carboxypeptidase	0	F:GO:0016787	F:hydrolase activity			IPR029058 (G3DSA:3.40.50.GENE3D); IPR008758 (PFAM); PTHR11010 (PANTHER); PTHR11010:SF38 (PANTHER); IPR029058 (SUPERFAMILY)	P:GO:0006508; F:GO:0008236	P:proteolysis; F:serine-type peptidase activity
